# Supplementary material
Source: Royal Society of Chemistry journal article supplement (doi:10.1039/d6ob00436a)
Supplement: d6ob00436a1.pdf [file d6ob00436a1.pdf]

Electronic Supporting Information

For

**Co(II) mediated cascade cyclization of unactivated olefin  
to afford *N*-alkylacetamided tetrahydropyridazine and  
dihydropyrazole**

Subham Sau, and Arunabha Thakur\*

Department of Chemistry, Jadavpur University, Kolkata-700032, West Bengal, India.

Email: [arunabha.thakur@jadavpuruniversity.in](mailto:arunabha.thakur@jadavpuruniversity.in)

**Table of Contents**

| <b><u>Contents</u></b>                                                  | <b><u>Page no.</u></b> |
|-------------------------------------------------------------------------|------------------------|
| Table S1: Classification of synthesized compounds as known and unknown. | S2                     |
| Spectral data and HRMS                                                  | S2-S95                 |
| Spectral data for Hammett Analysis                                      | S96-S99                |
| HRMS of Radical adducts                                                 | S100-S101              |

**Table S1:** Classification of synthesized compounds as known and unknown.

| Known | Unknown                                                                                                                         |
|-------|---------------------------------------------------------------------------------------------------------------------------------|
| NIL   | 2a, 2b, 2c, 2d, 2e, 2f, 2g, 2h, 2i, 2j, 2k, 2l, 2m, 2n, 2o, 2p, 2q, 2r, 2s, 2t, 2u, 2v, 2w, 2x, 2y, 2z, 2za, 2zb, 2zc, 2zd, 2ze |

**Spectral data of final products:**

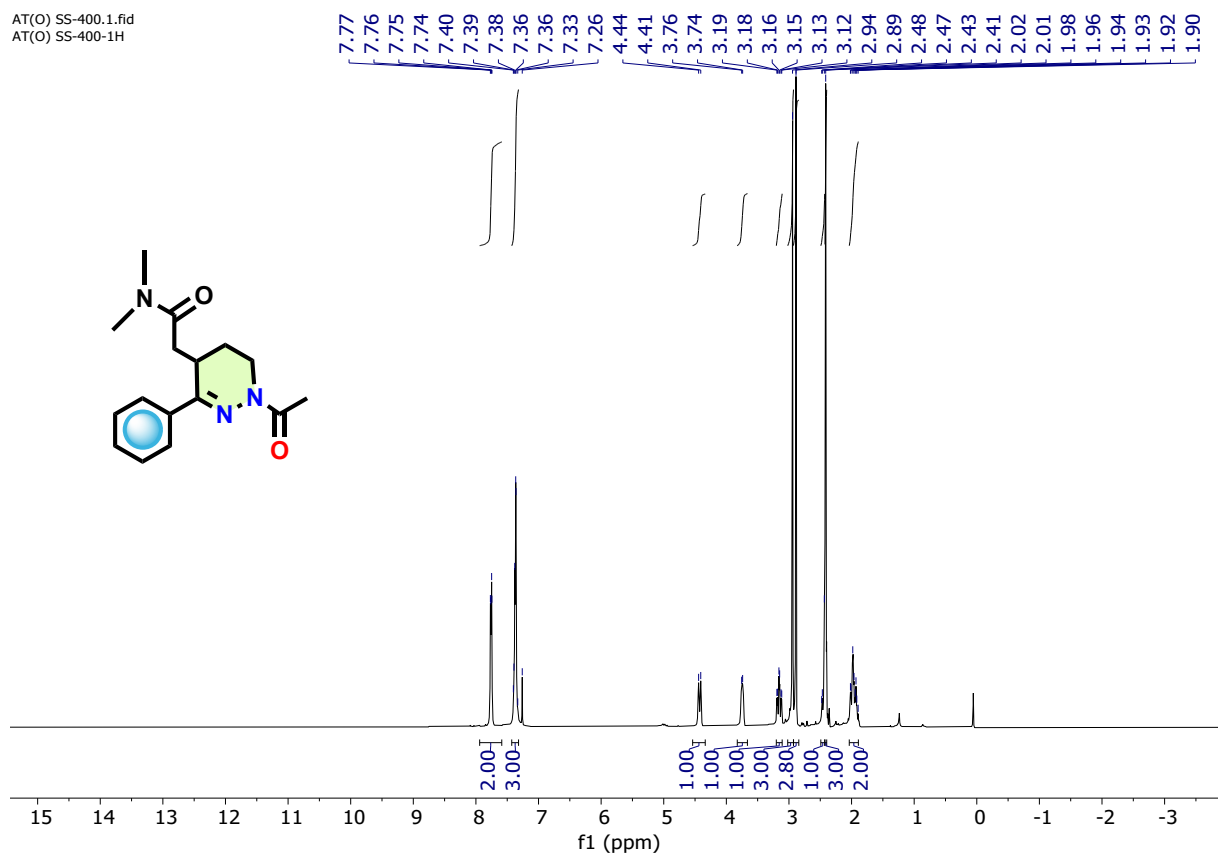

**Figure S1.**  $^1\text{H}$  (400 MHz) NMR of **2a** compound in  $\text{CDCl}_3$ .

AT(O)SS-400B(Benzaldehyd...MF-13C)-P.1.fid  
AT(O)SS-400B-13C

172.45  
169.82

149.09

135.91  
129.31  
128.68  
125.84

77.40  
77.09  
76.77

37.03  
35.64  
35.10  
35.02  
26.90  
22.09  
21.40

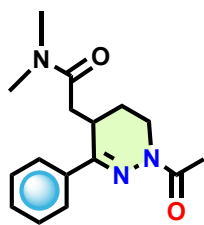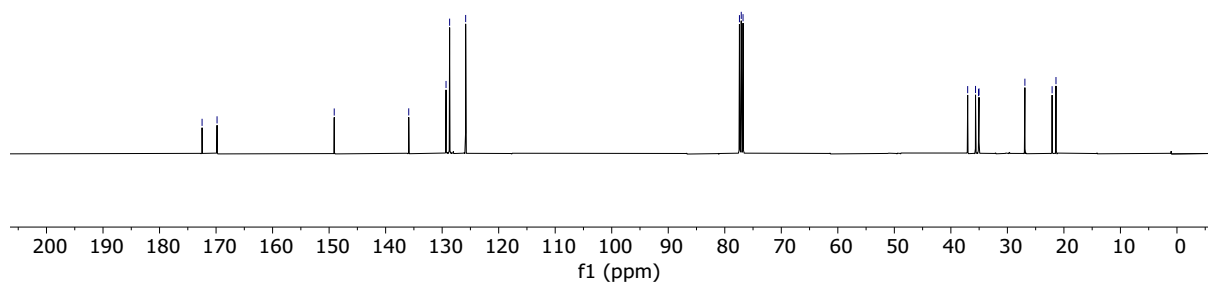

Figure S2.  $^{13}\text{C}$  (100 MHz) NMR of **2a** compound in  $\text{CDCl}_3$ .

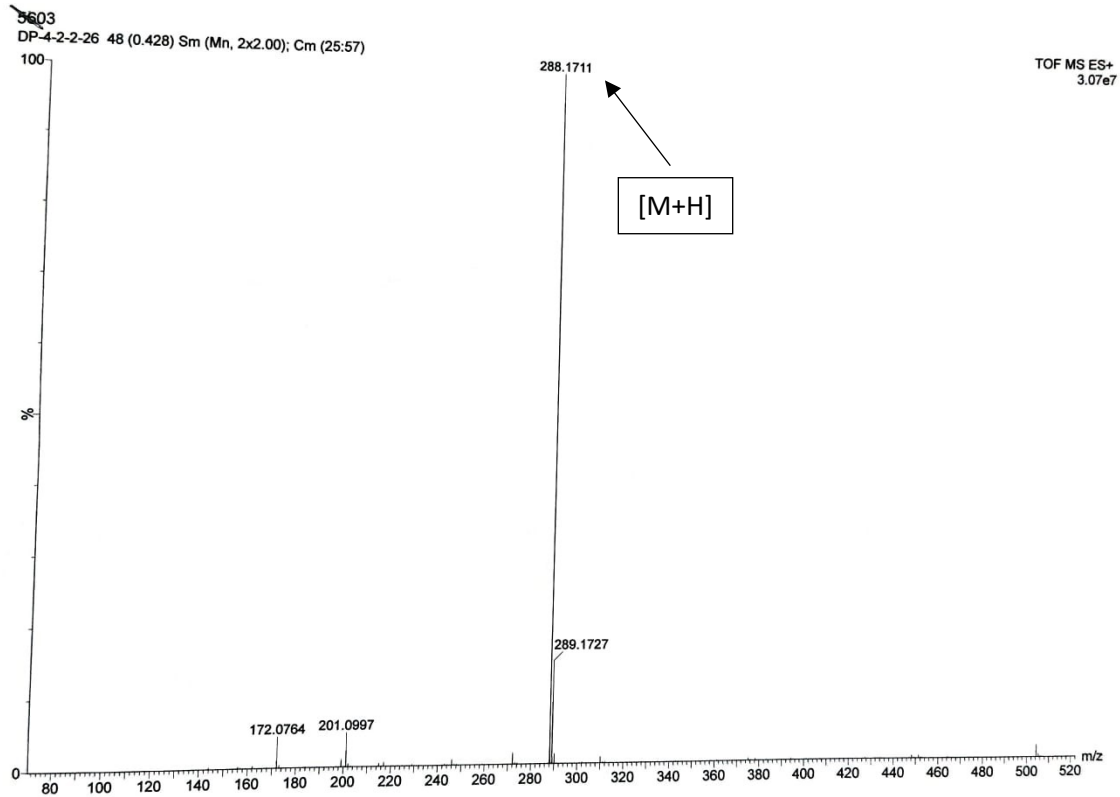

**Figure S3.** HRMS of Compound **2a**.

AT(O)SS-349.1.fid  
AT(O)SS-349-1H

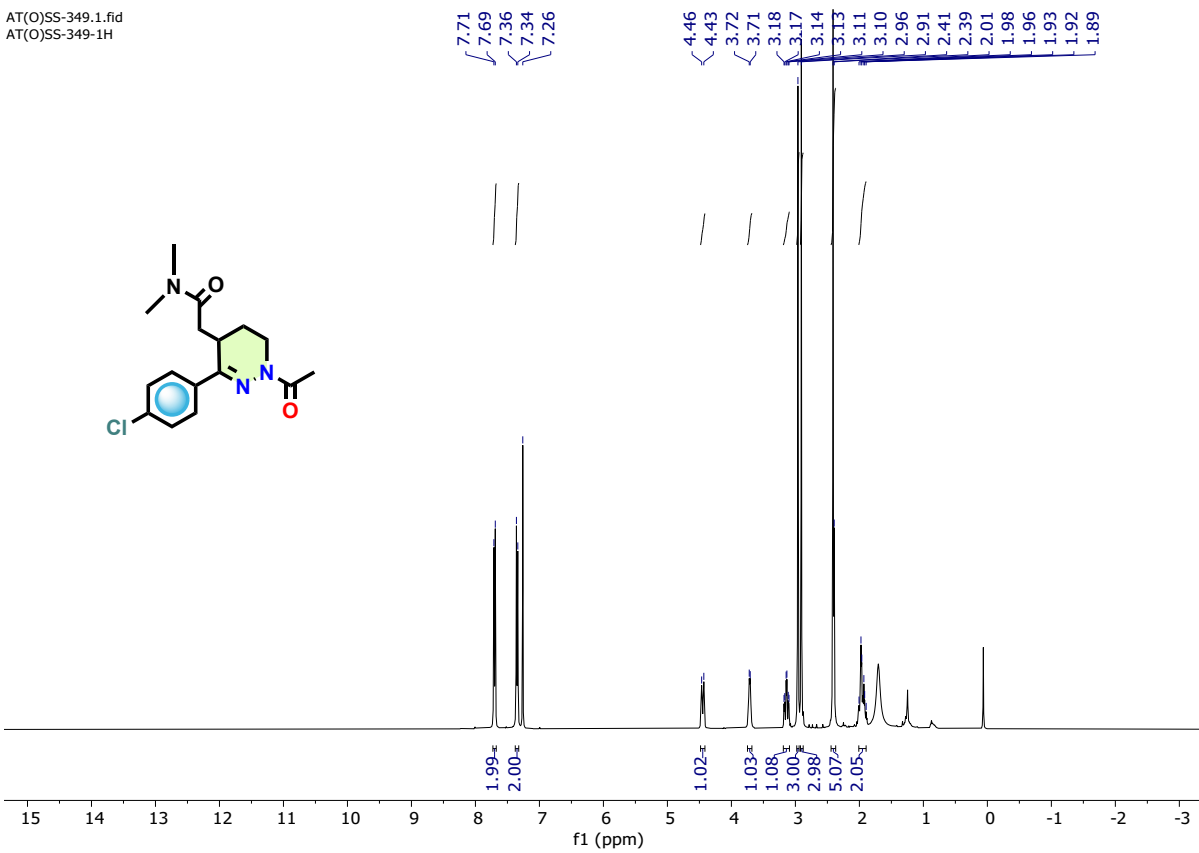

Figure S4. <sup>1</sup>H (400 MHz) NMR of **2b** compound in CDCl<sub>3</sub>.

AT(O)-SS-349(A)(4-Cl-acepho+DMF-13C)fid  
AT(O)-SS-349(A)-13C

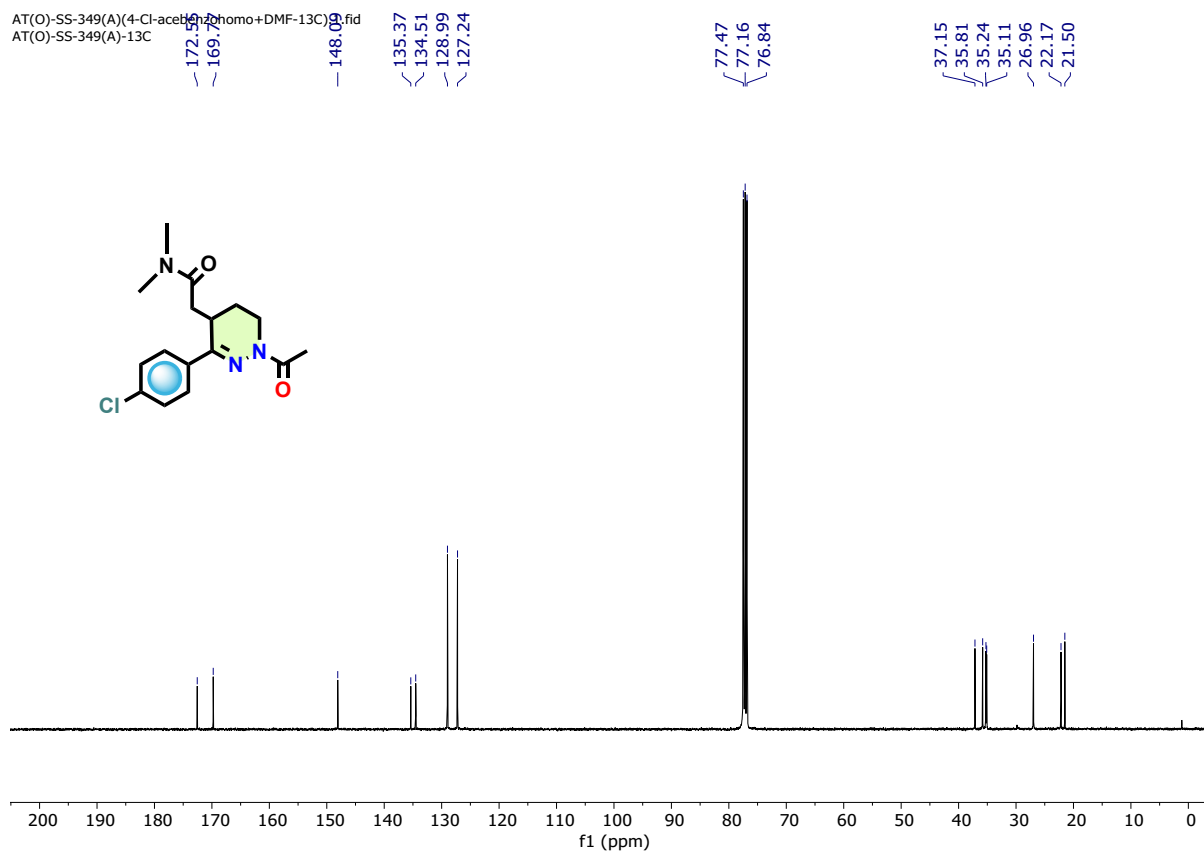

Figure S5.  $^{13}\text{C}$  (100 MHz) NMR of **2b** compound in  $\text{CDCl}_3$ .

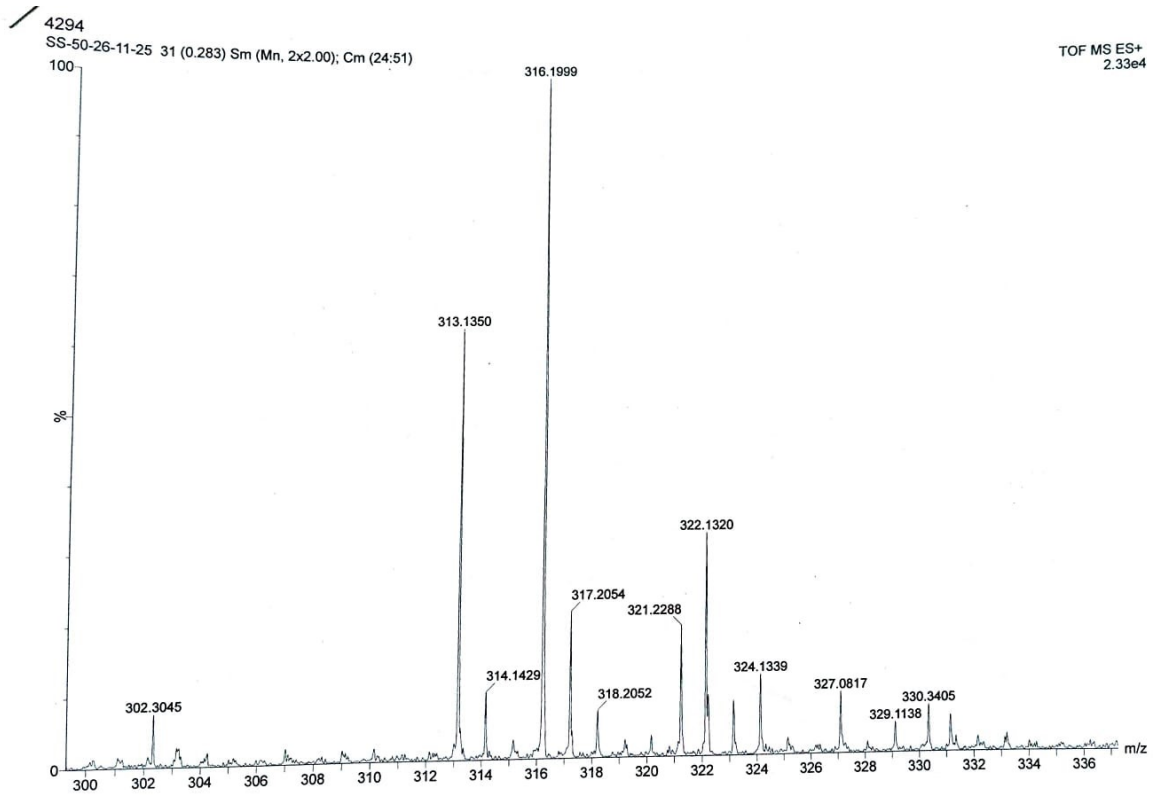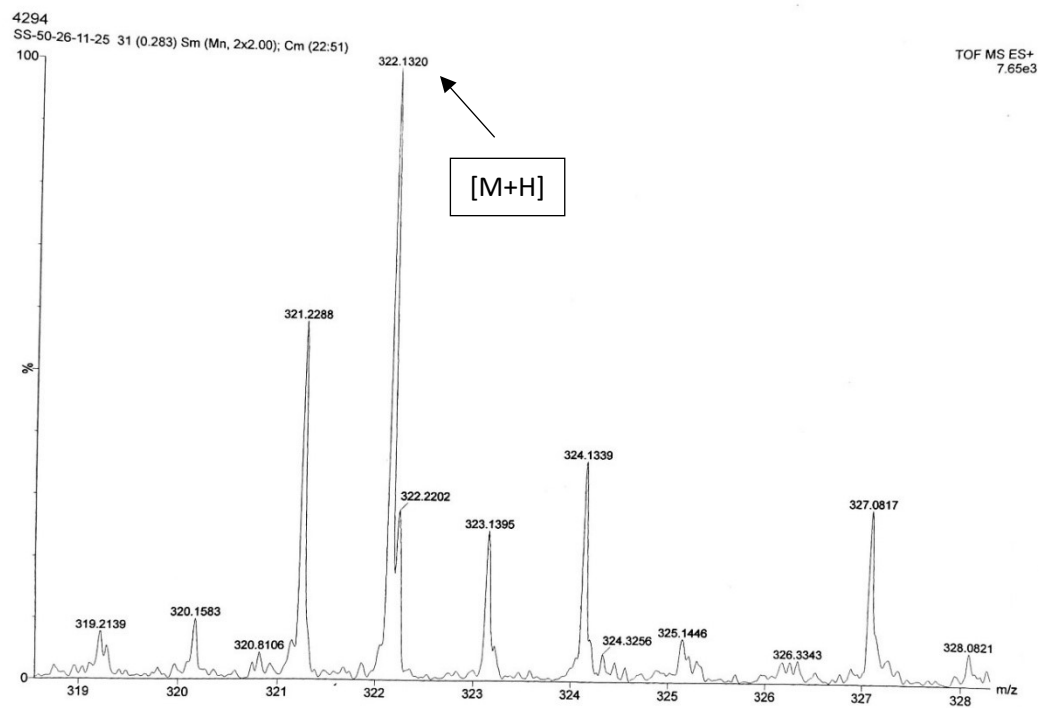

Figure S6. HRMS of Compound 2b.

AT(O)-SS-405.1.fid  
AT(O)-SS-405-1H

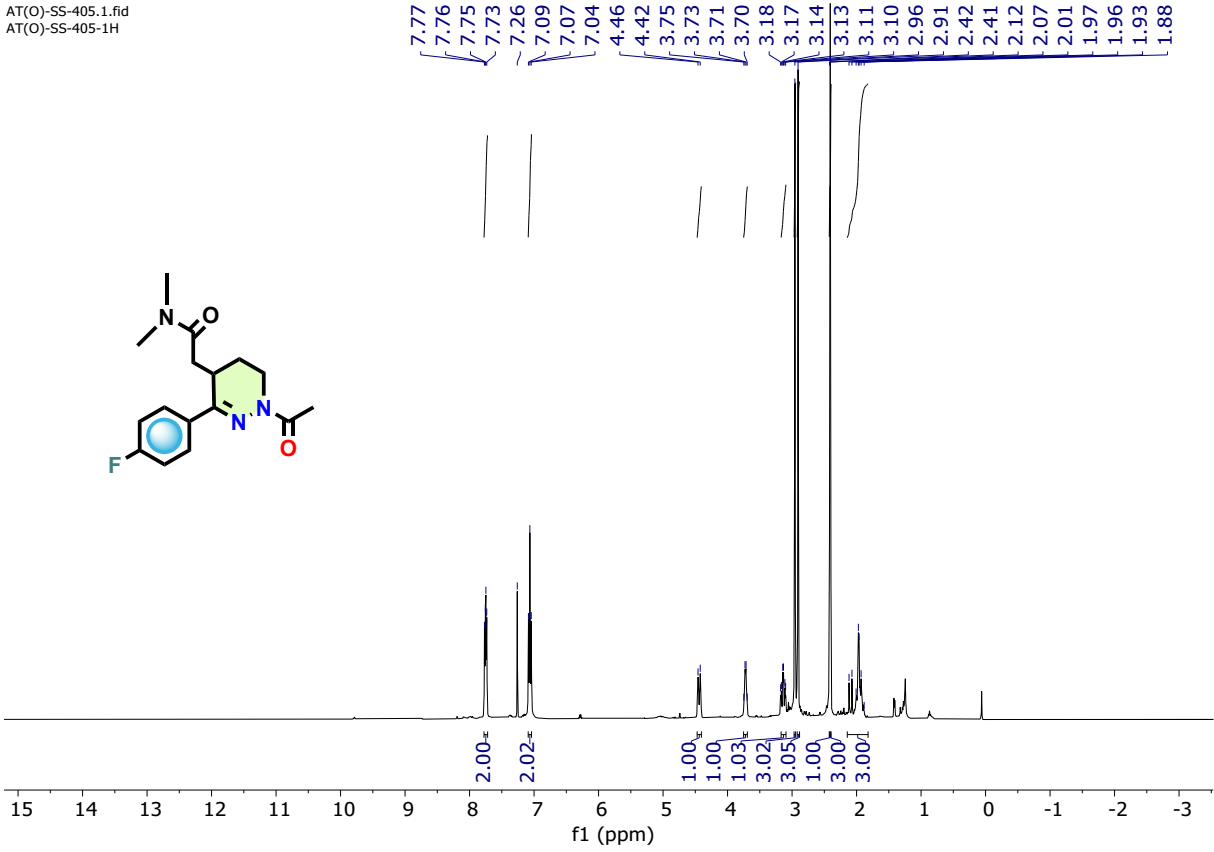

Figure S7. <sup>1</sup>H (400 MHz) NMR of **2c** compound in CDCl<sub>3</sub>.

AT(O)-SS-405(4-F+DMF-1H+13-C+19F).3.fid  
AT(O)-SS-405-19F

--111.85

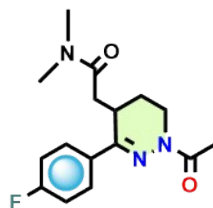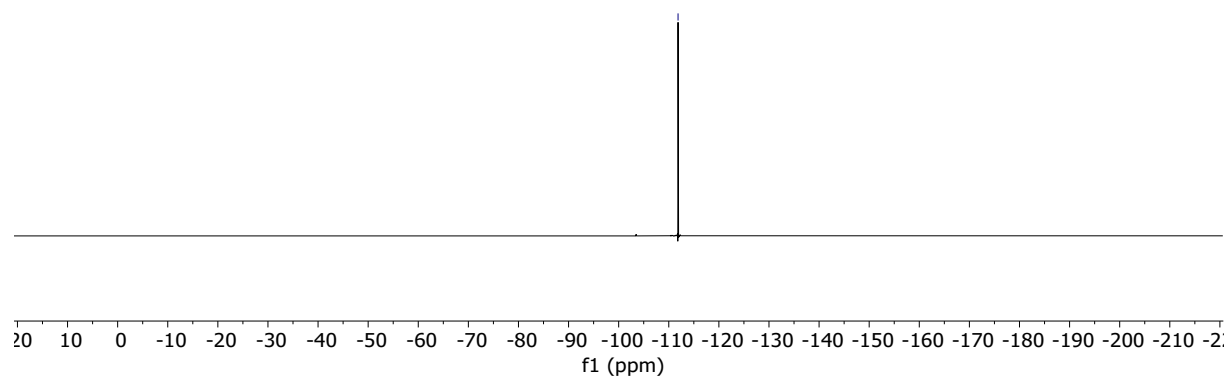

**Figure S8.** <sup>19</sup>F (400 MHz) NMR of **2c** compound in CDCl<sub>3</sub>.

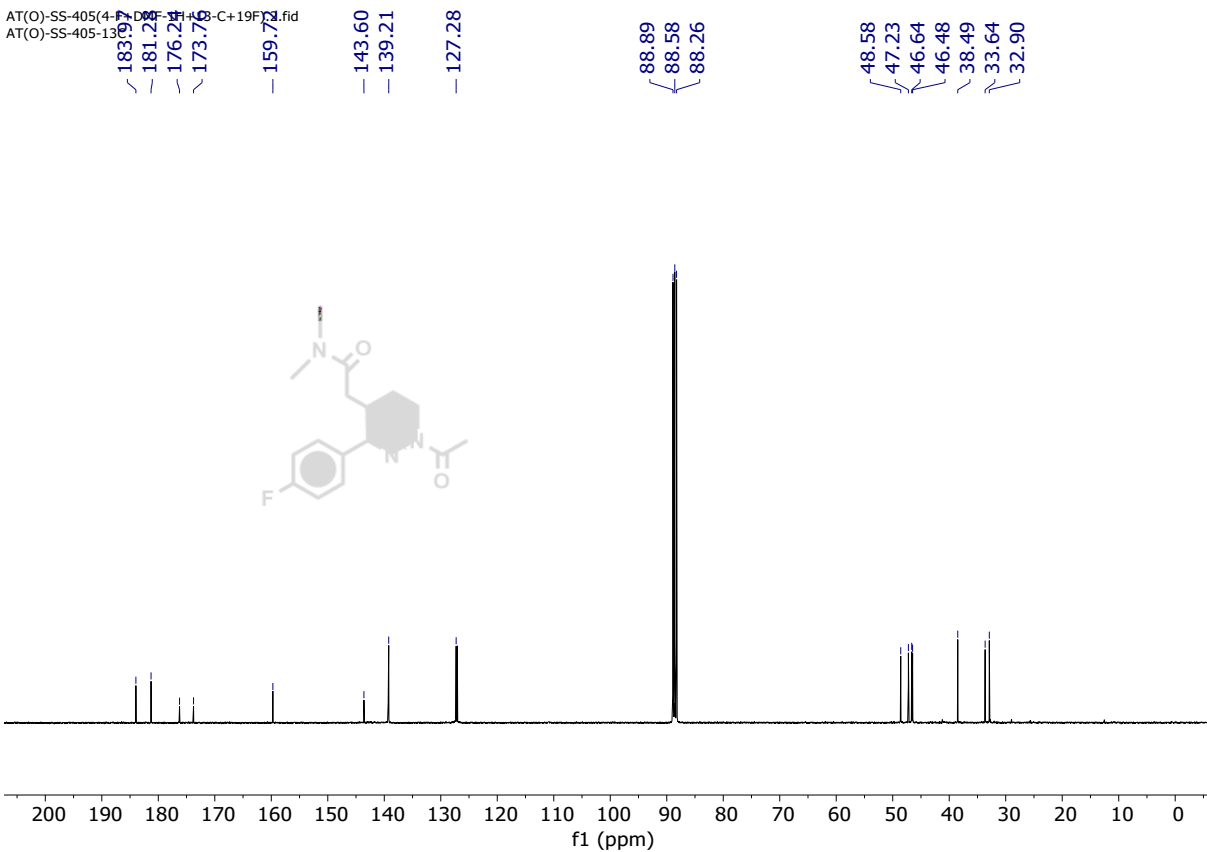

**Figure S9.**  $^{13}\text{C}$  (100 MHz) NMR of **2c** compound in  $\text{CDCl}_3$ .

PKT22-Dec-202514:31:54

IISER-KOLKATA

1: TOF MS ES+  
1.16e7

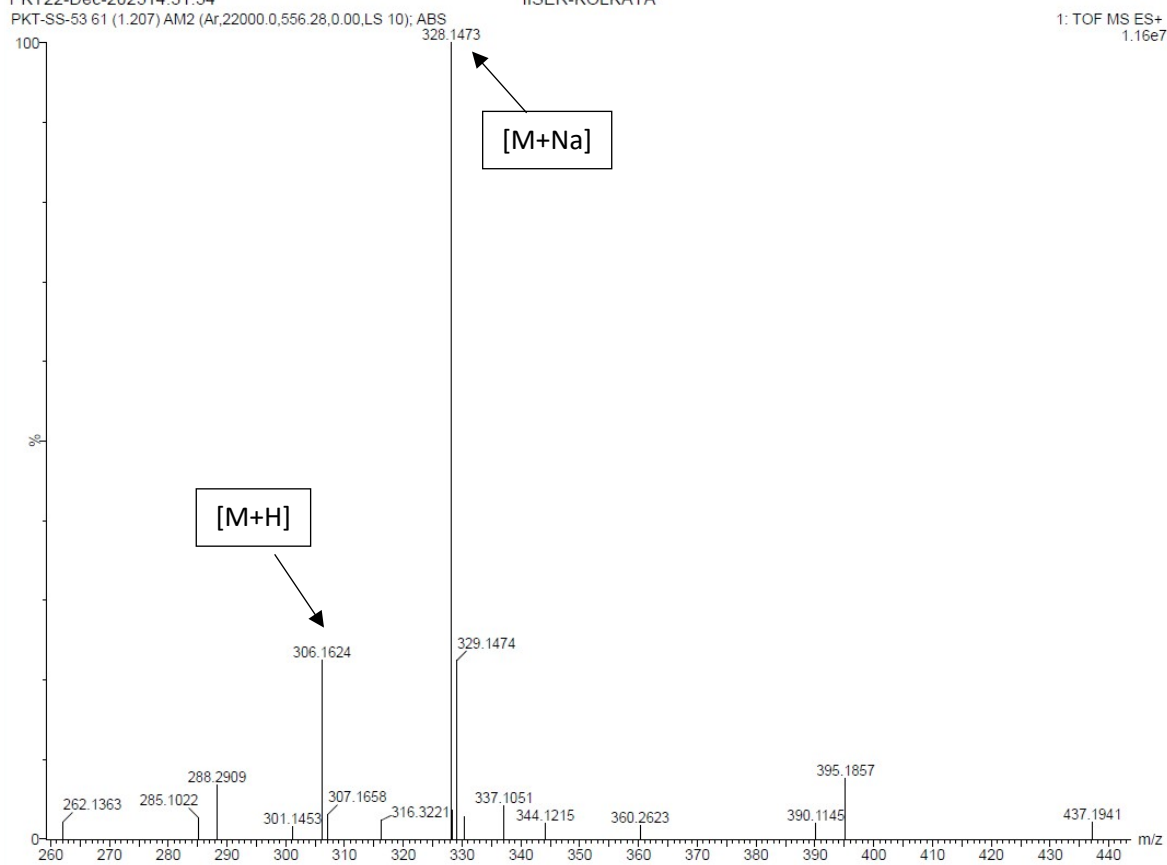

Figure S10. HRMS of Compound 2c.

AT(O)-SS-389(3-Br+DMF-1H).1.fid  
AT(O)-SS-389-1H

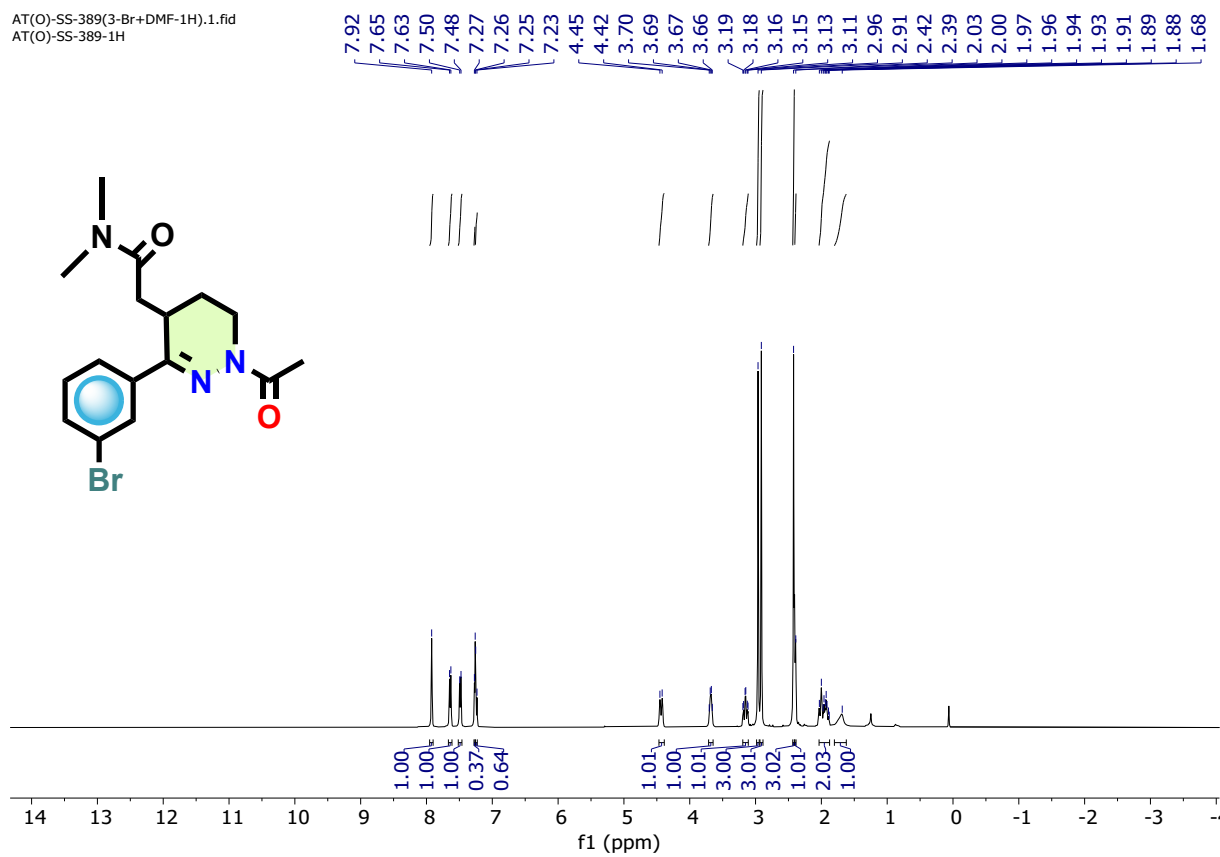

Figure S11. <sup>1</sup>H (400 MHz) NMR of 2d compound in CDCl<sub>3</sub>.

AT(O)-SS-389(A)(3-Br+DMF-13C).1.fid  
AT(O)-SS-389(A)-13C

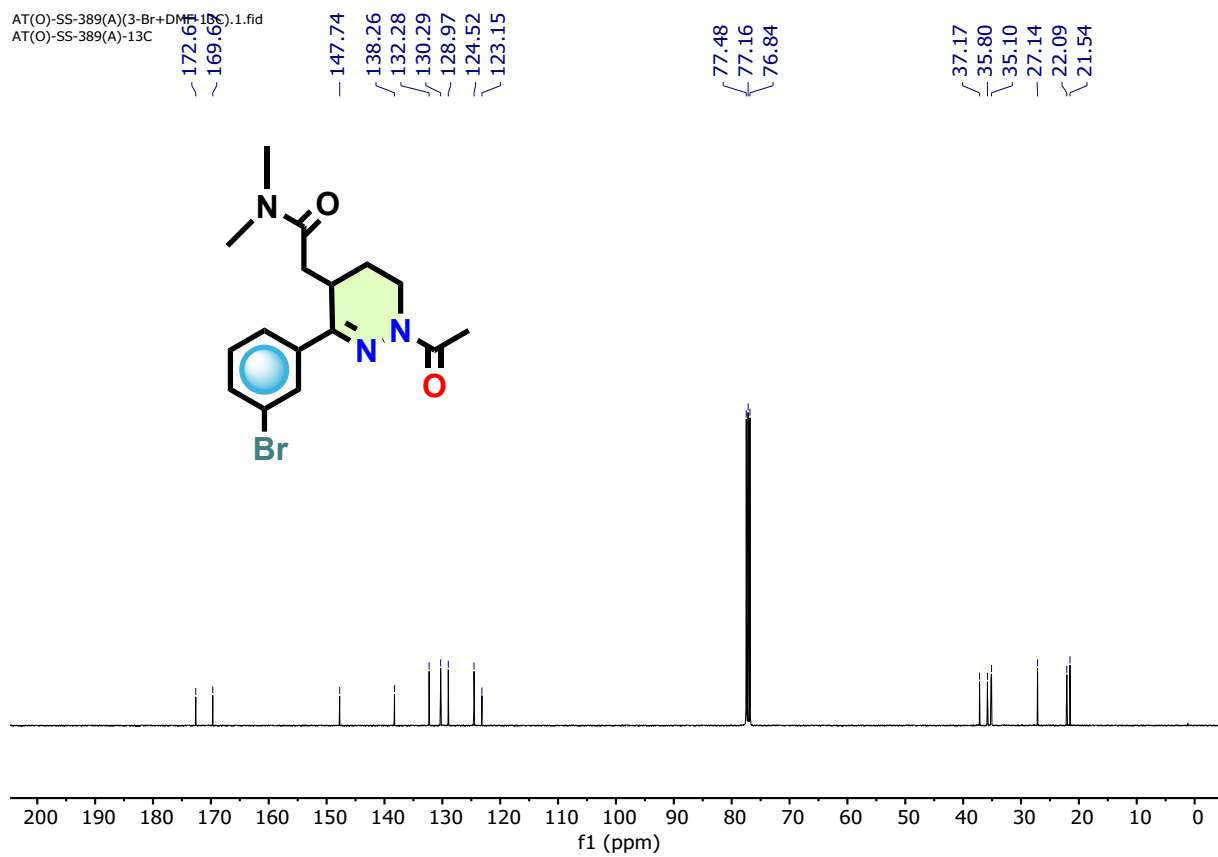

Figure S12. <sup>13</sup>C (100 MHz) NMR of **2d** compound in CDCl<sub>3</sub>.

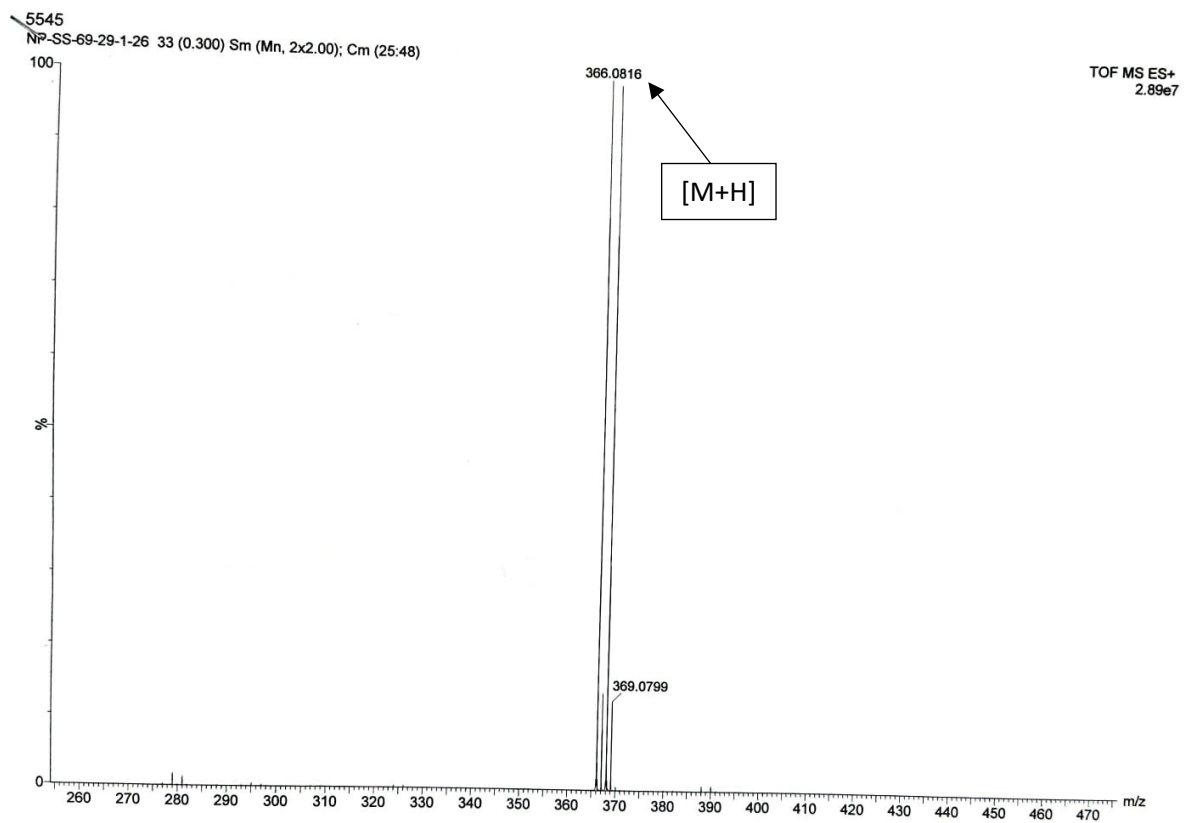

**Figure S13.** HRMS of compound **2d**.

AT(O)SS-401.1.fid  
AT(O)SS-401-1H

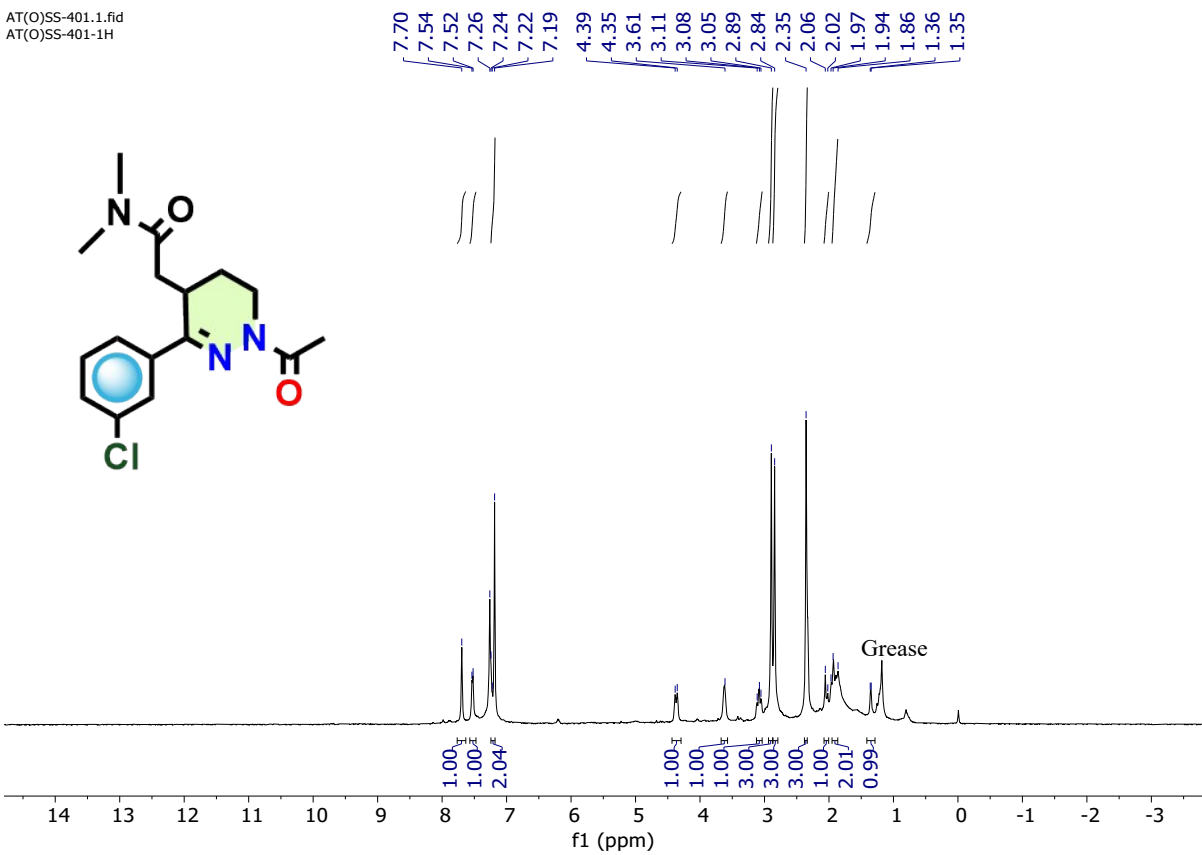

**Figure S14.**  $^1\text{H}$  (400 MHz) NMR of **2e** compound in  $\text{CDCl}_3$ .

AT(O)-SS-401(A)(3-Cl+DMF)  
AT(O)-SS-401(A)-13C

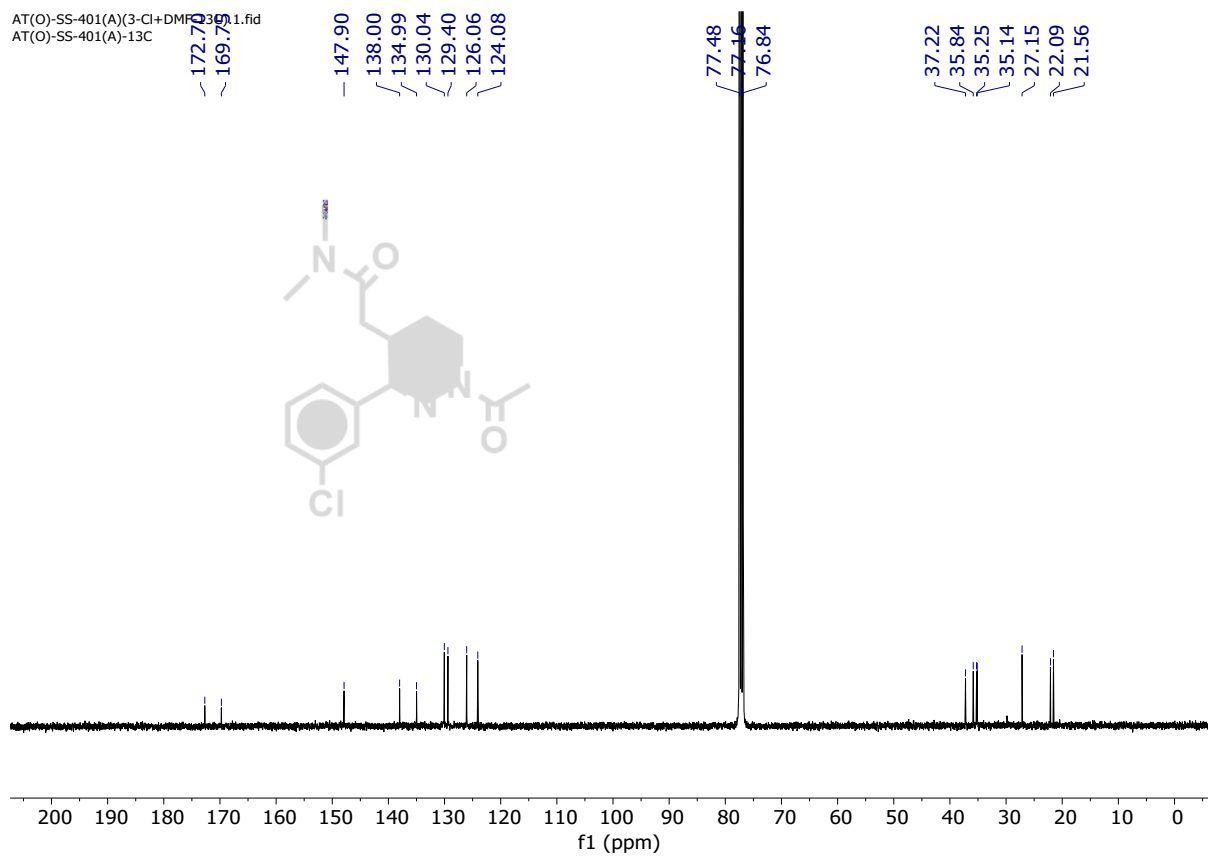

Figure S15.  $^{13}\text{C}$  (100 MHz) NMR of **2e** compound in  $\text{CDCl}_3$ .

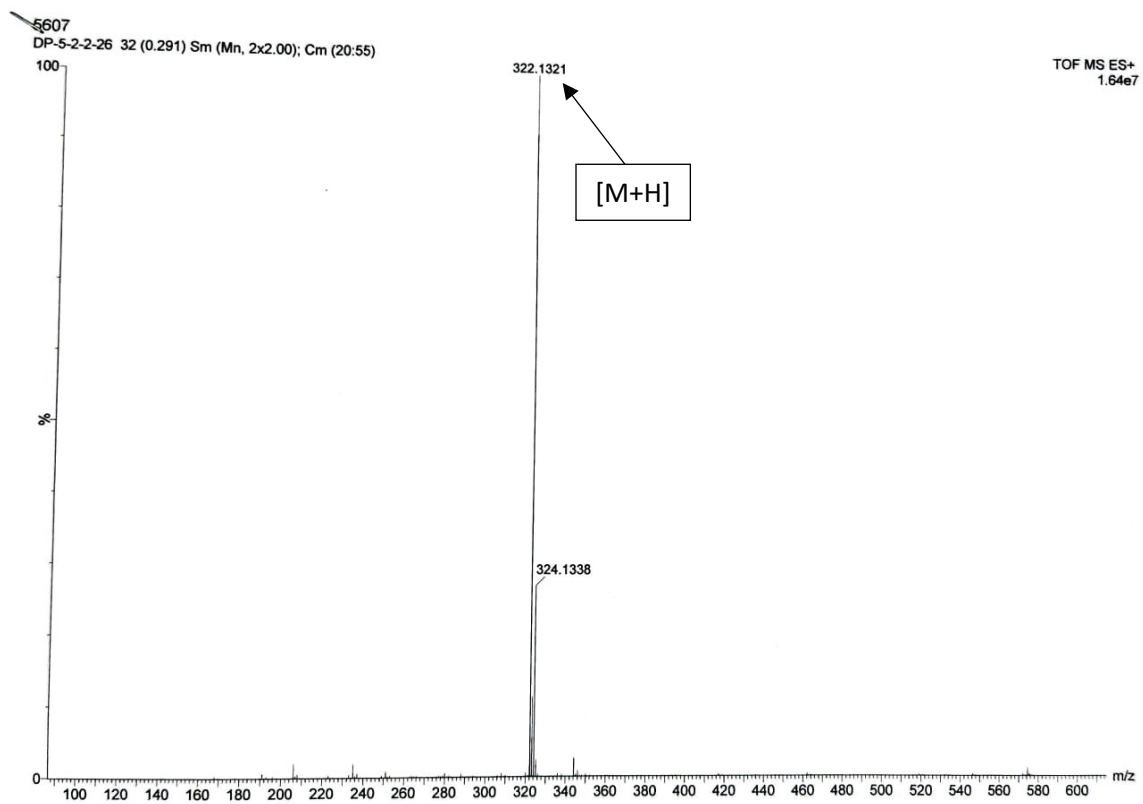

**Figure S16.** HRMS of compound **2e**.

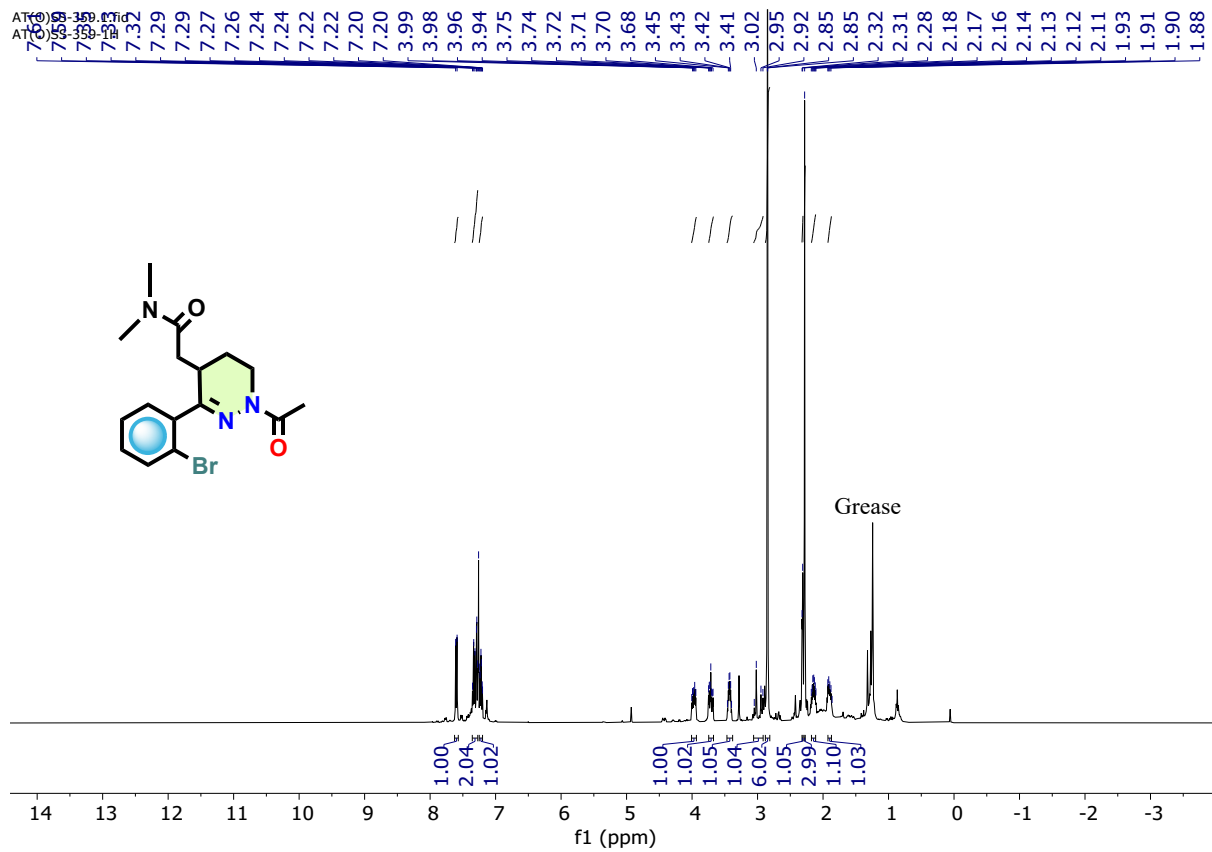

Figure S17. <sup>1</sup>H (400 MHz) NMR of **2f** compound in CDCl<sub>3</sub>.

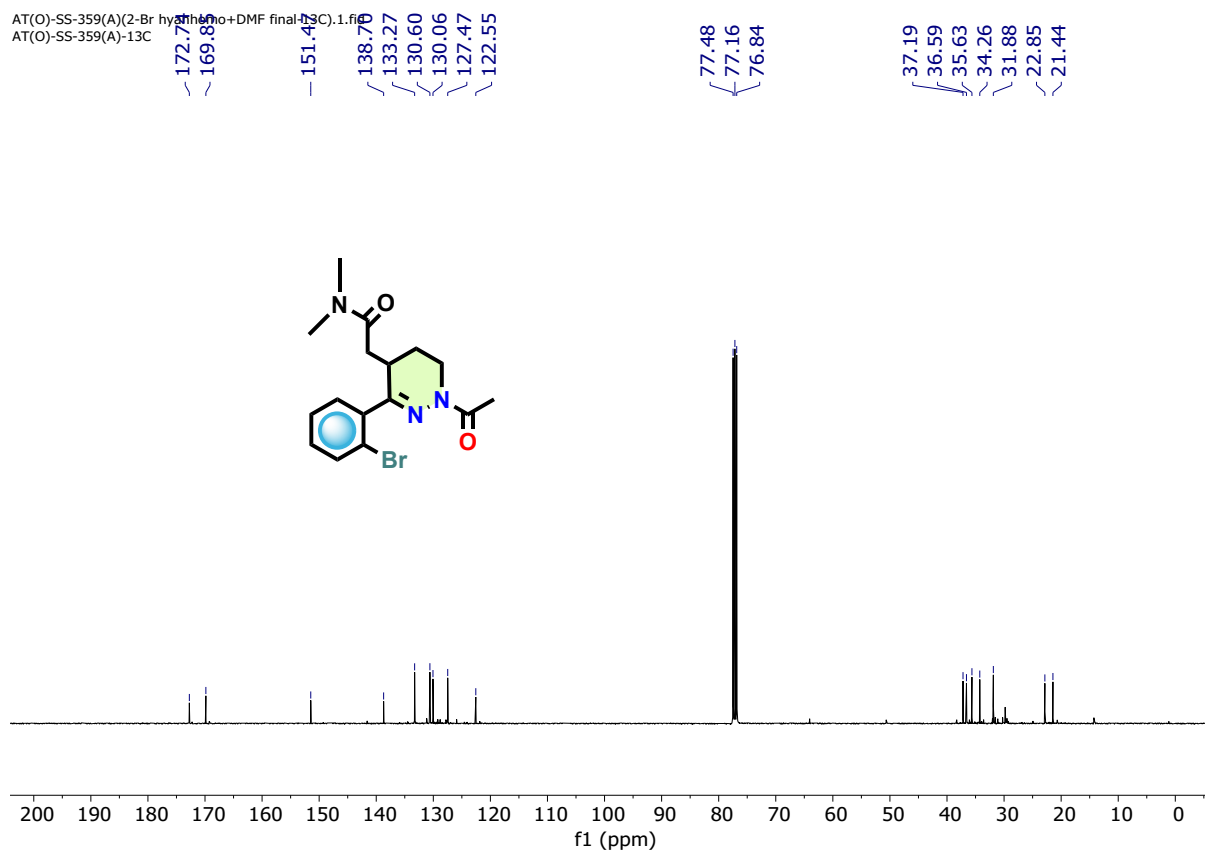

**Figure S18.**  $^{13}\text{C}$  (100 MHz) NMR of **2f** compound in  $\text{CDCl}_3$ .

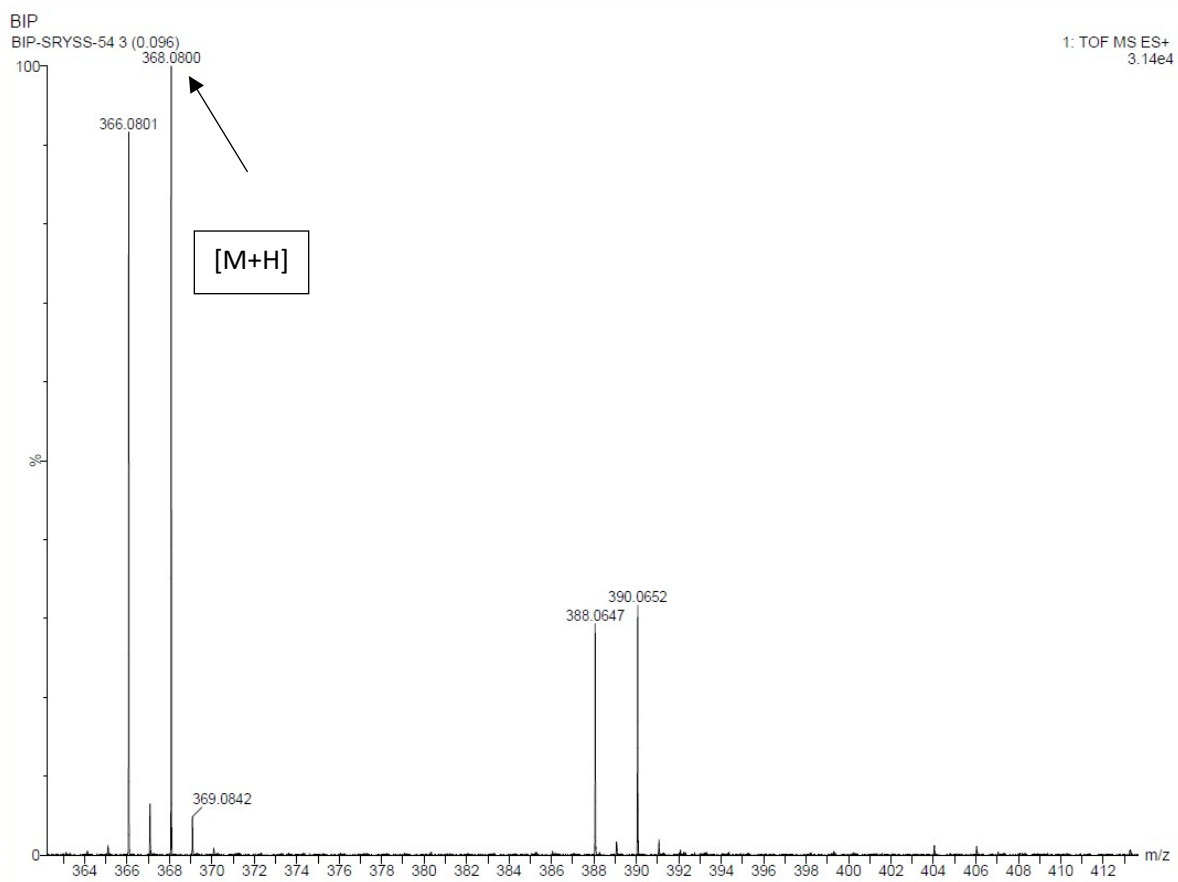

**Figure S19.** HRMS of compound **2f**.

AT(O)-SS-360-B(4-Me+DMF-1H),1.fid  
AT(O)-SS-360-B-1H

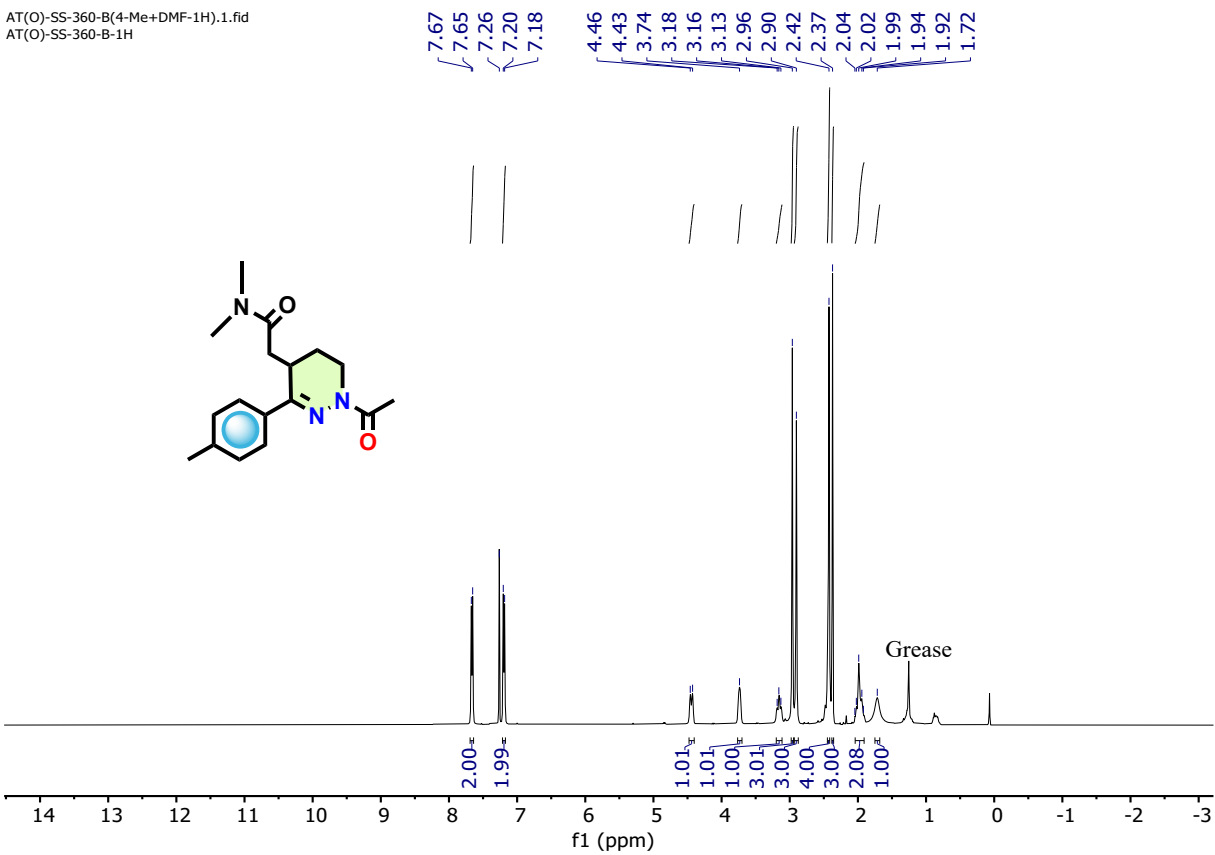

Figure S20.  $^1\text{H}$  (400 MHz) NMR of **2g** compound in  $\text{CDCl}_3$

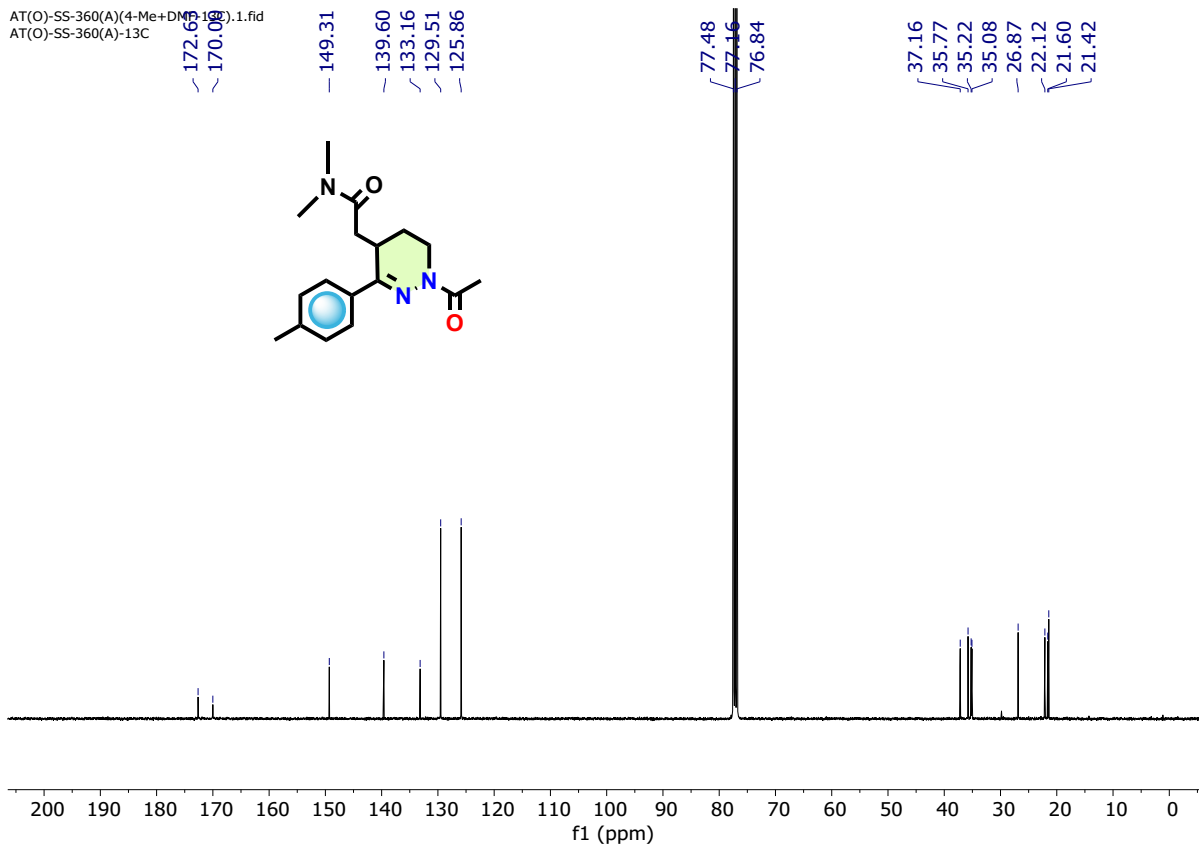

Figure S21. <sup>13</sup>C (100 MHz) NMR of 2g compound in CDCl<sub>3</sub>

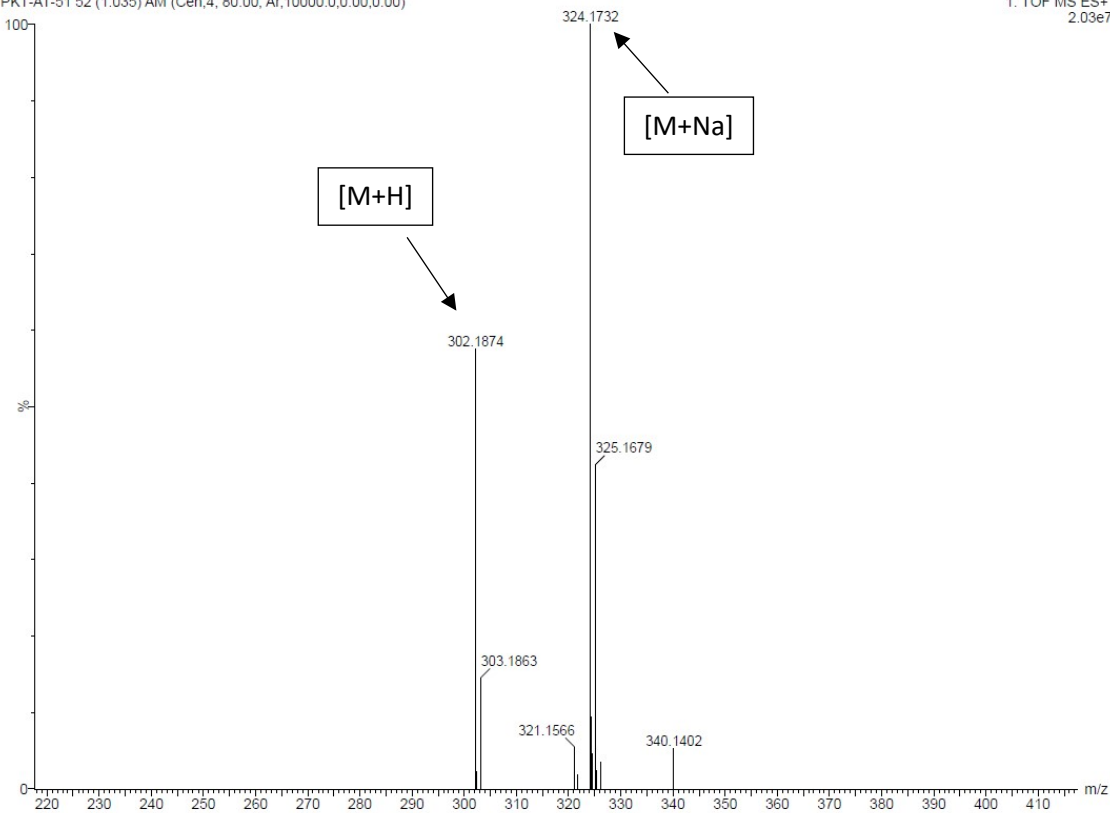

**Figure S22.** HRMS of compound **2g**.

AT(O)-SS-358.1.fid  
AT(O)-SS-358-1H

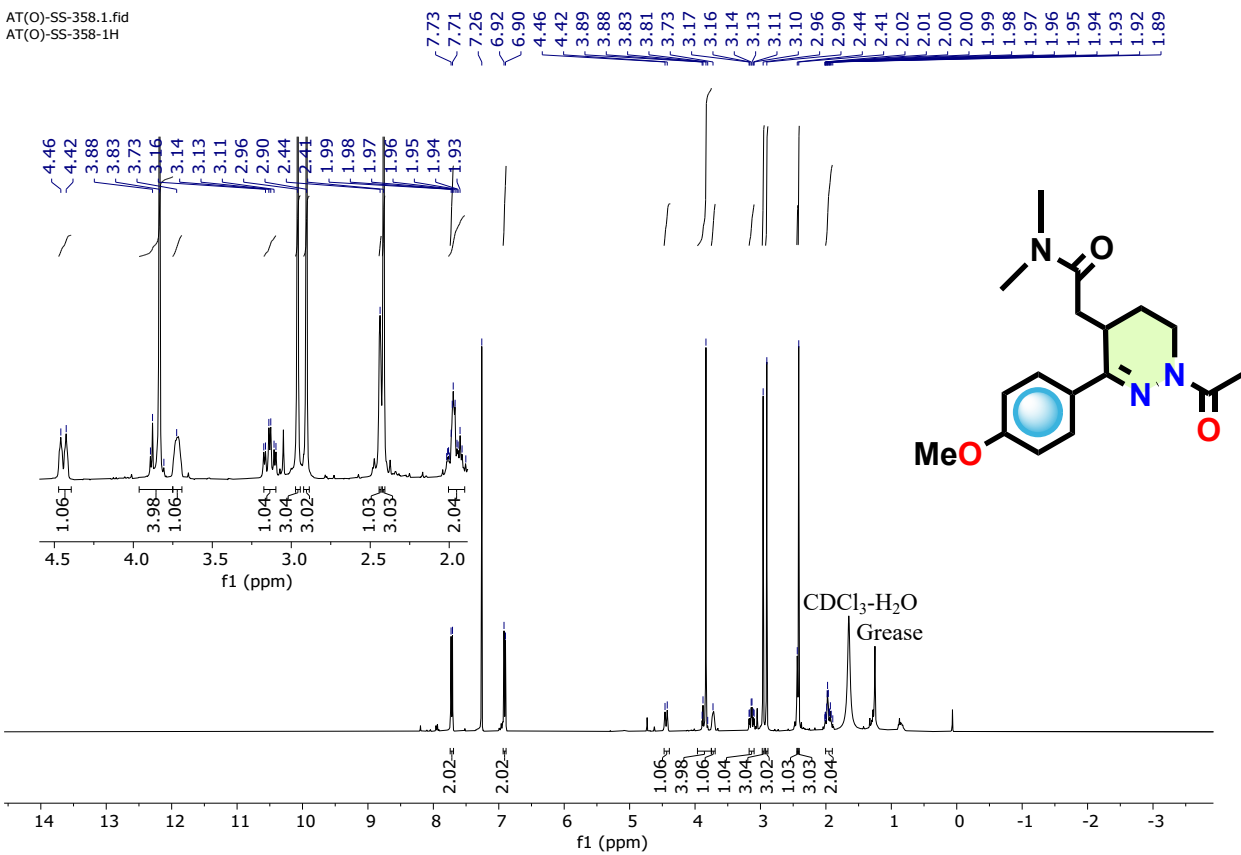

Figure S23. <sup>1</sup>H (400 MHz) NMR of **2h** compound in CDCl<sub>3</sub>

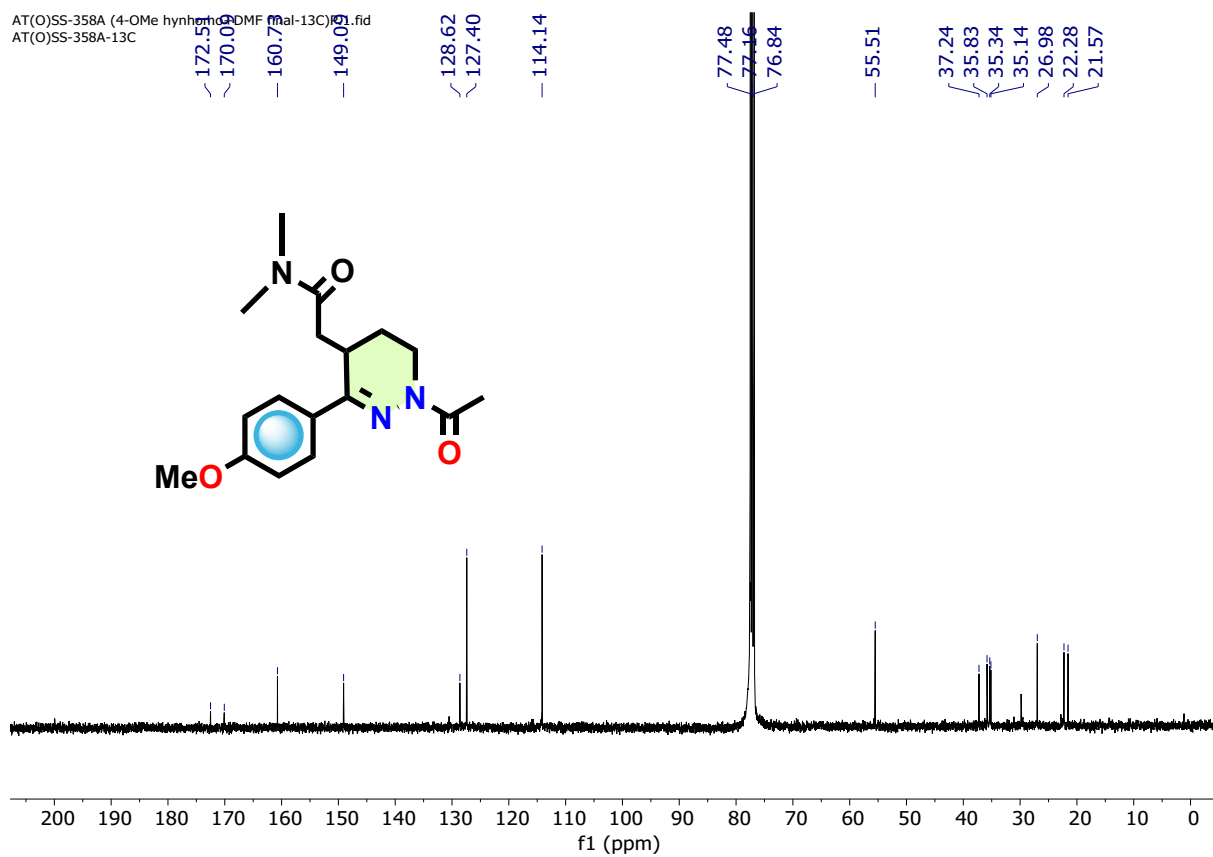

Figure S24. <sup>13</sup>C (100 MHz) NMR of **2h** compound in CDCl<sub>3</sub>

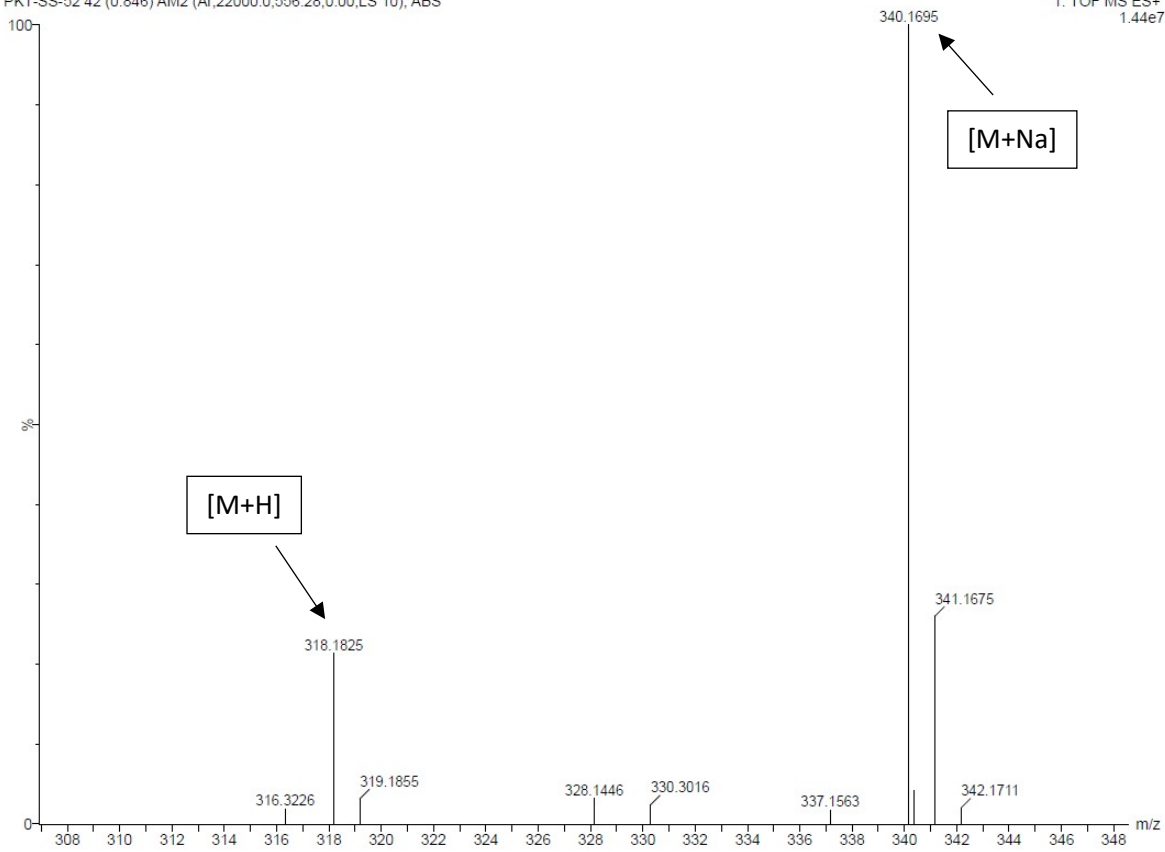

Figure S25. HRMS of compound 2h.



AT(O)SS-410.2.fid  
AT(O)SS-410-13C

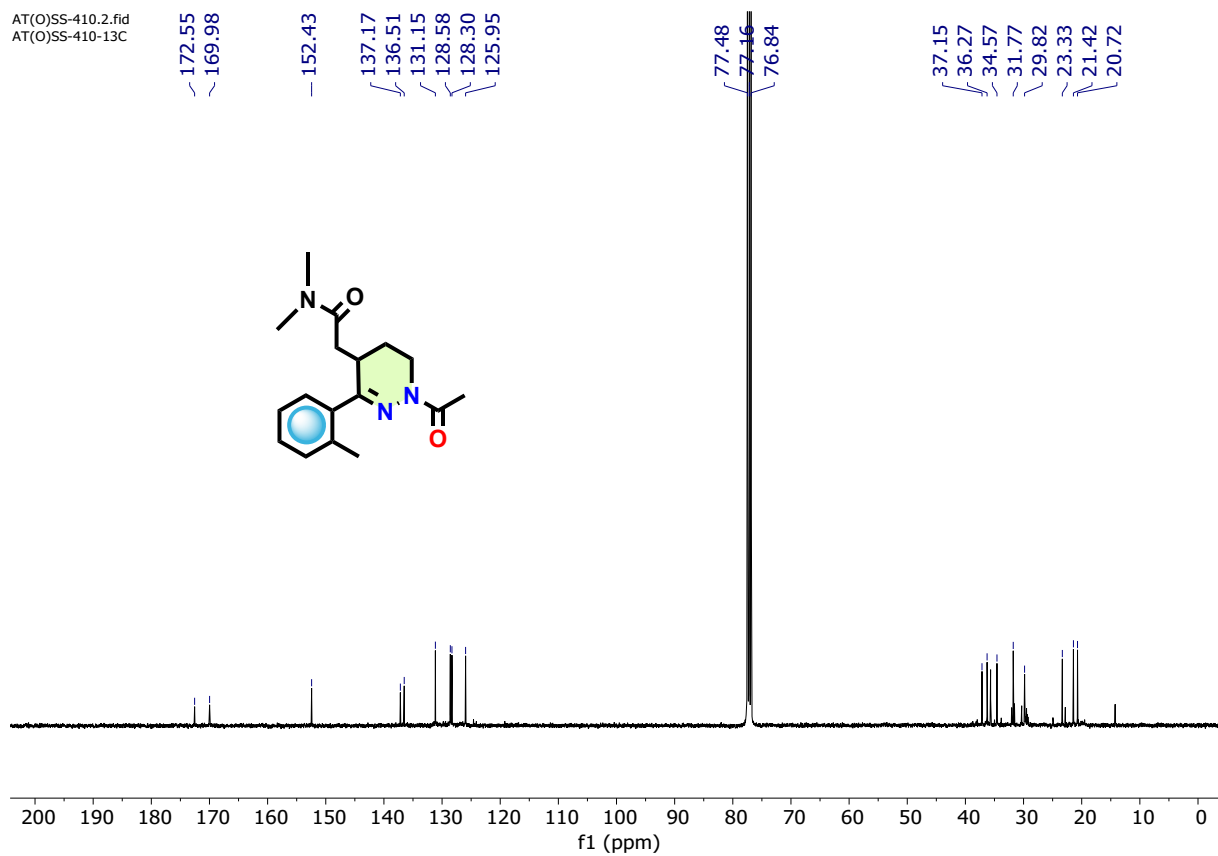

Figure S27:  $^{13}\text{C}$  (100 MHz) NMR of **2i** compound in  $\text{CDCl}_3$ .

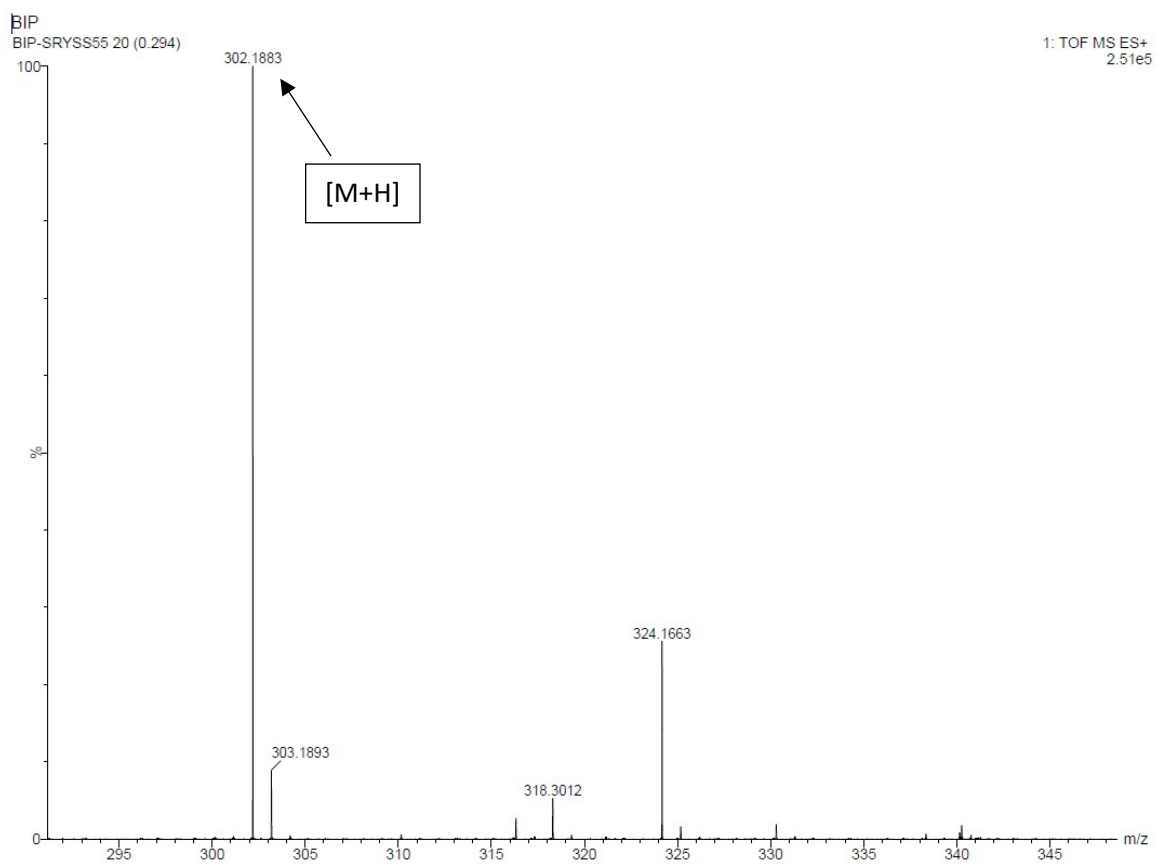

**Figure S28.** HRMS of compound **2i**.

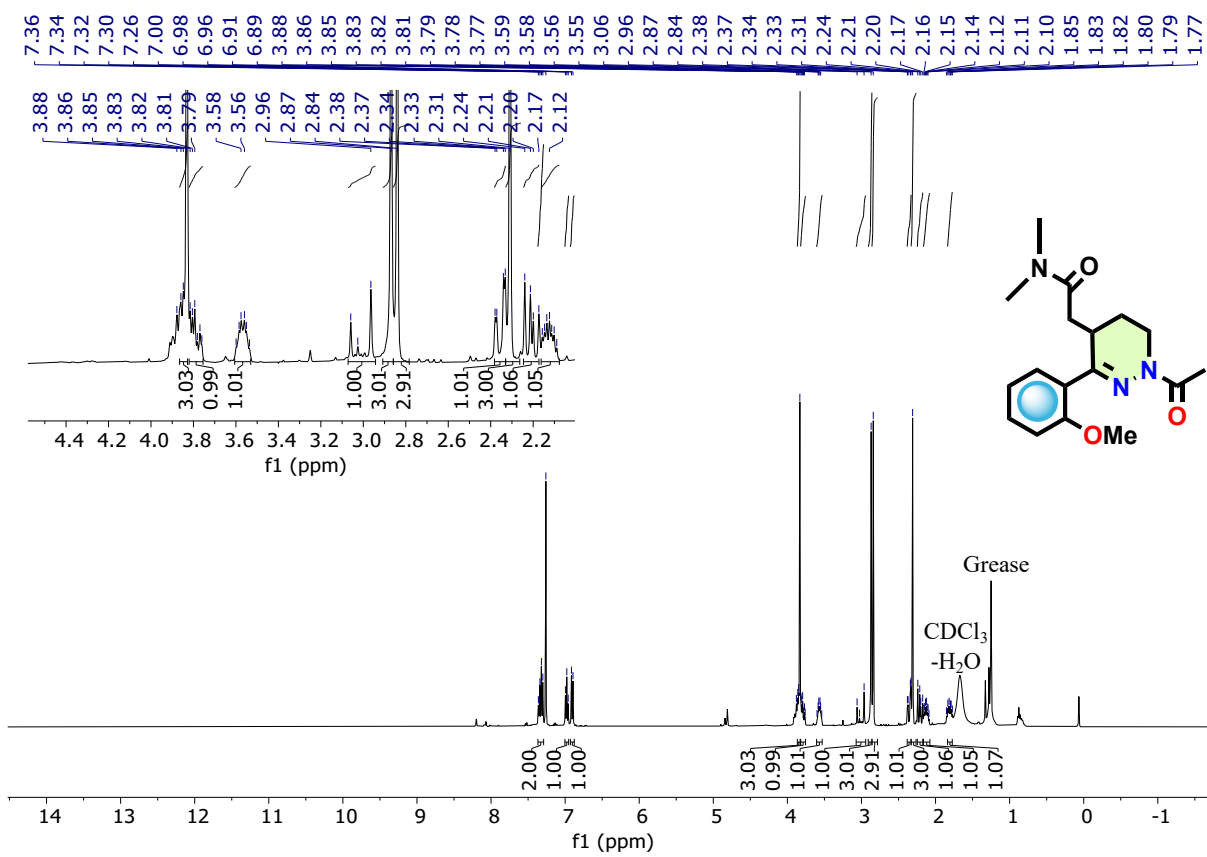

Figure S29.  $^1\text{H}$  (400 MHz) NMR of **2j** compound in  $\text{CDCl}_3$

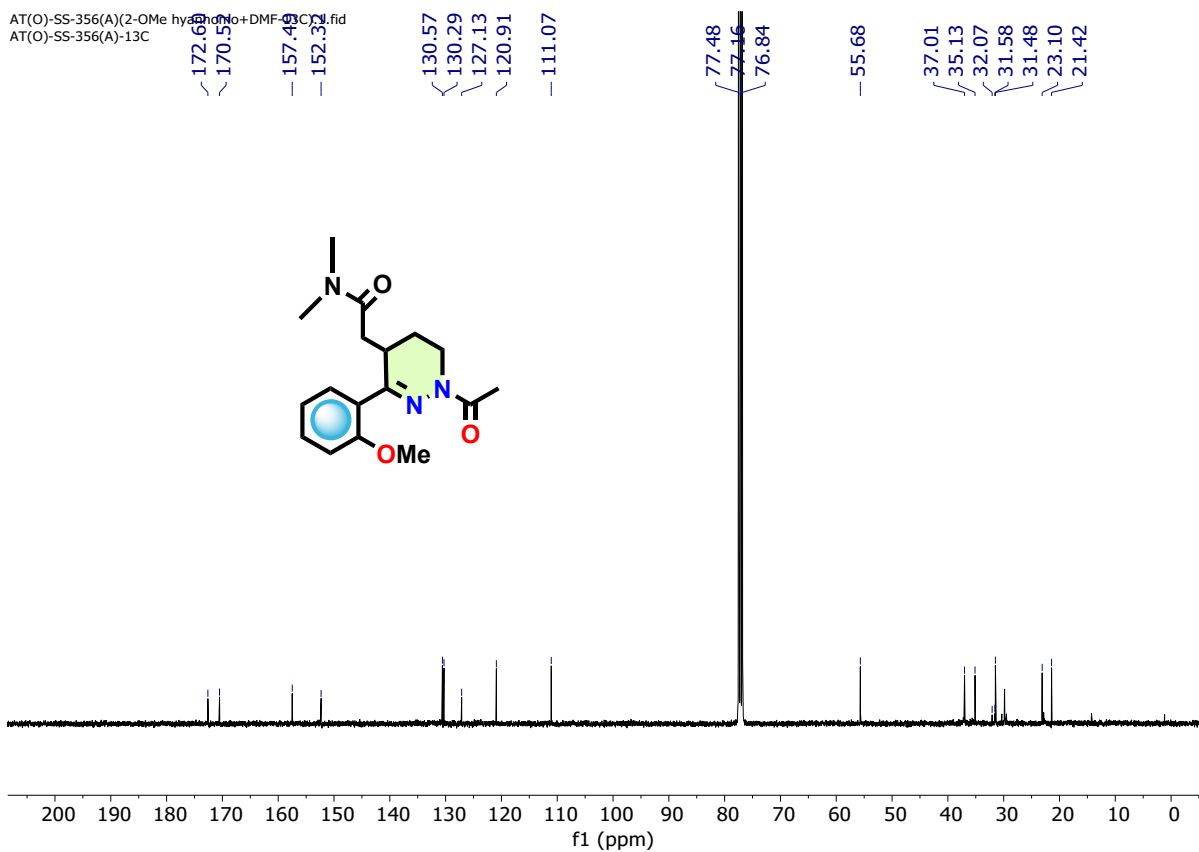

Figure S30:  $^{13}\text{C}$  (100 MHz) NMR of **2j** compound in  $\text{CDCl}_3$ .

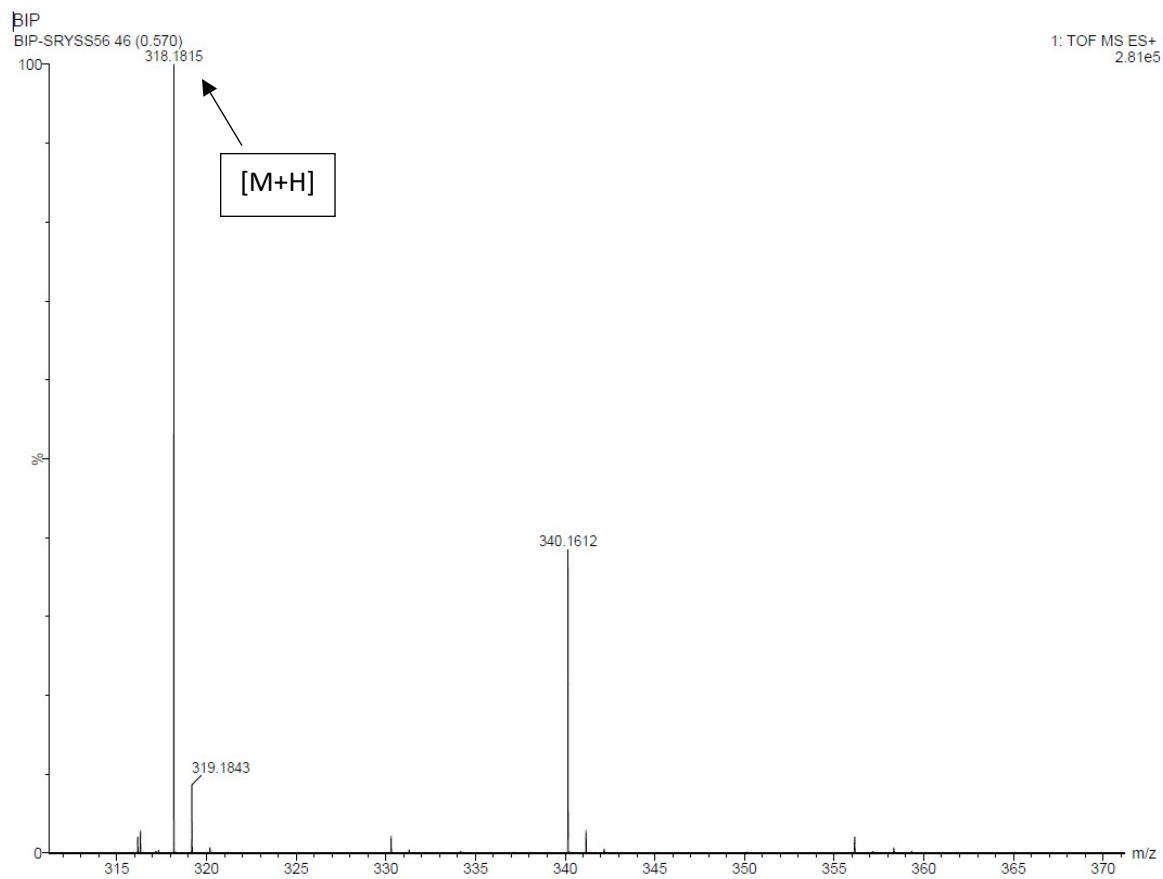

**Figure S31.** HRMS of compound **2j**.

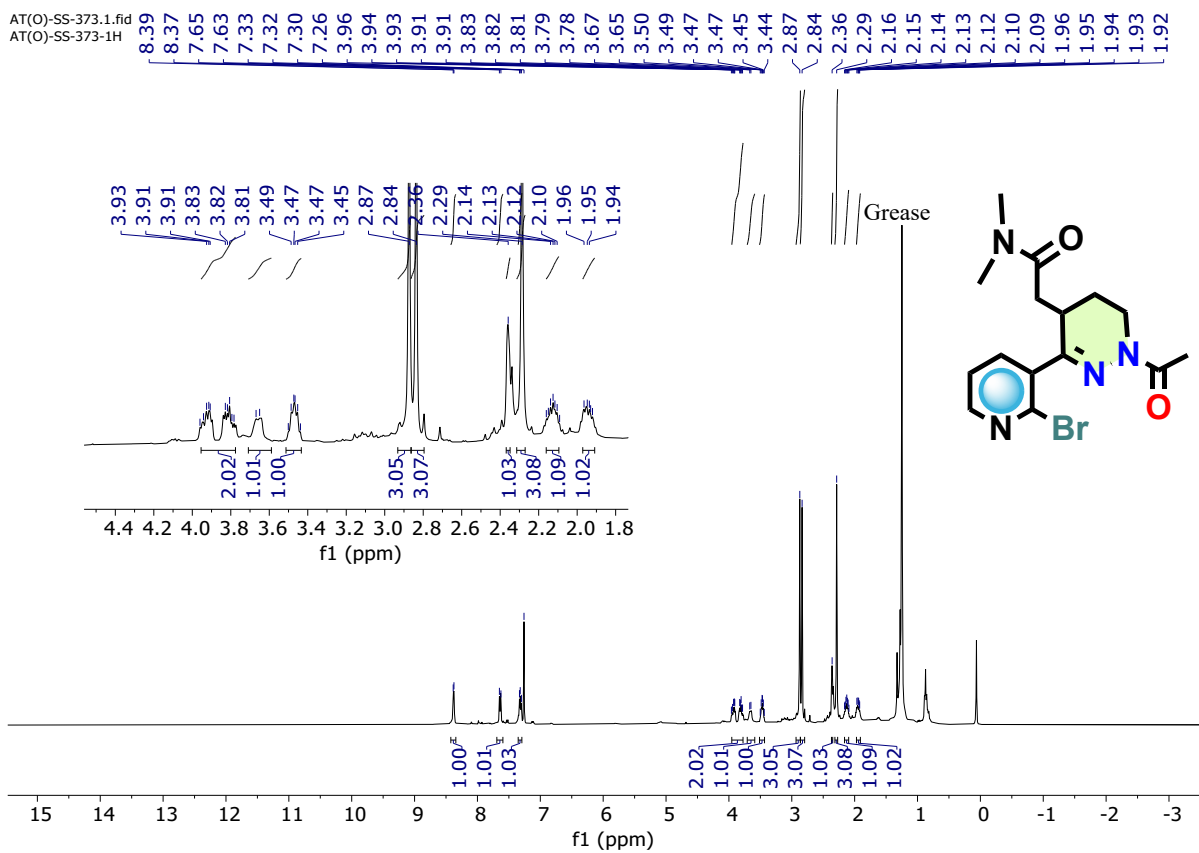

Figure S32.  $^1\text{H}$  (400 MHz) NMR of **2k** compound in  $\text{CDCl}_3$

AT(O)-SS-373(A).1.fid  
AT(O)-SS-373(A)-13C

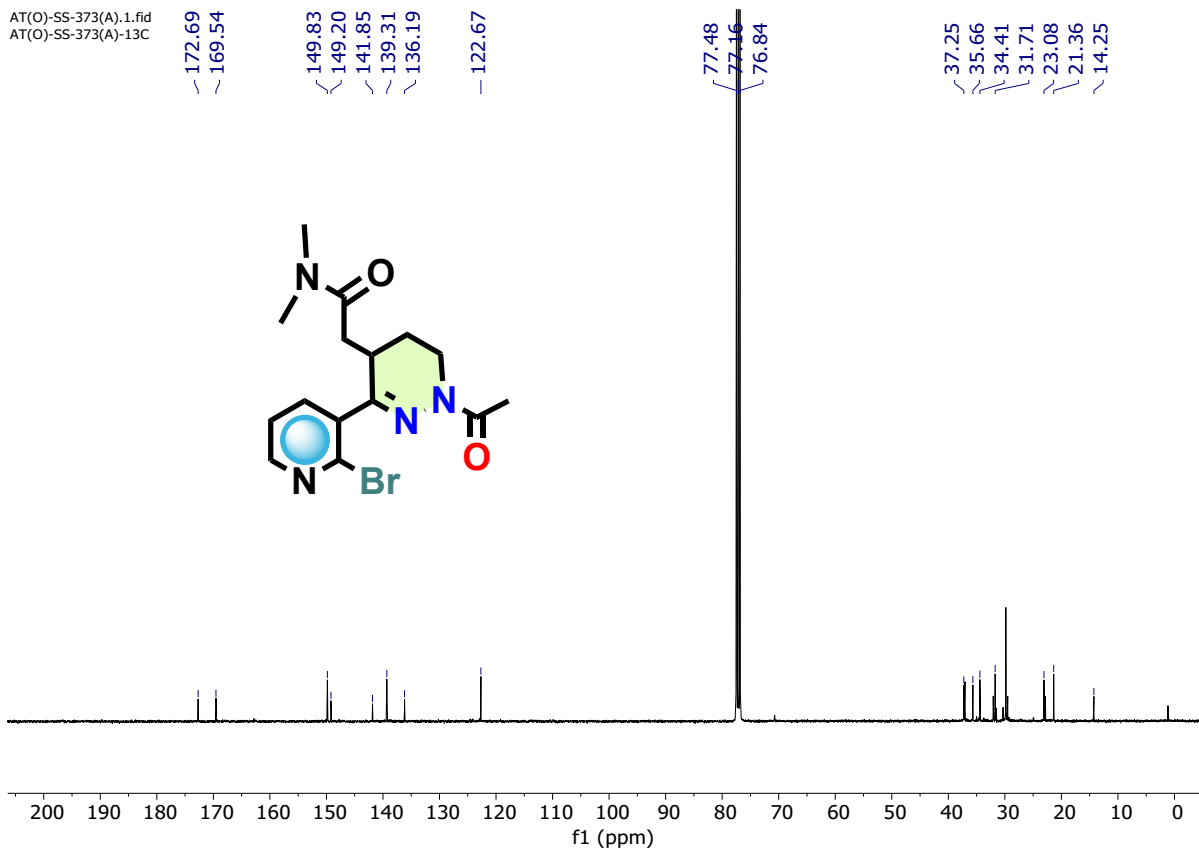

Figure S33.  $^{13}\text{C}$  (100 MHz) NMR of **2k** compound in  $\text{CDCl}_3$

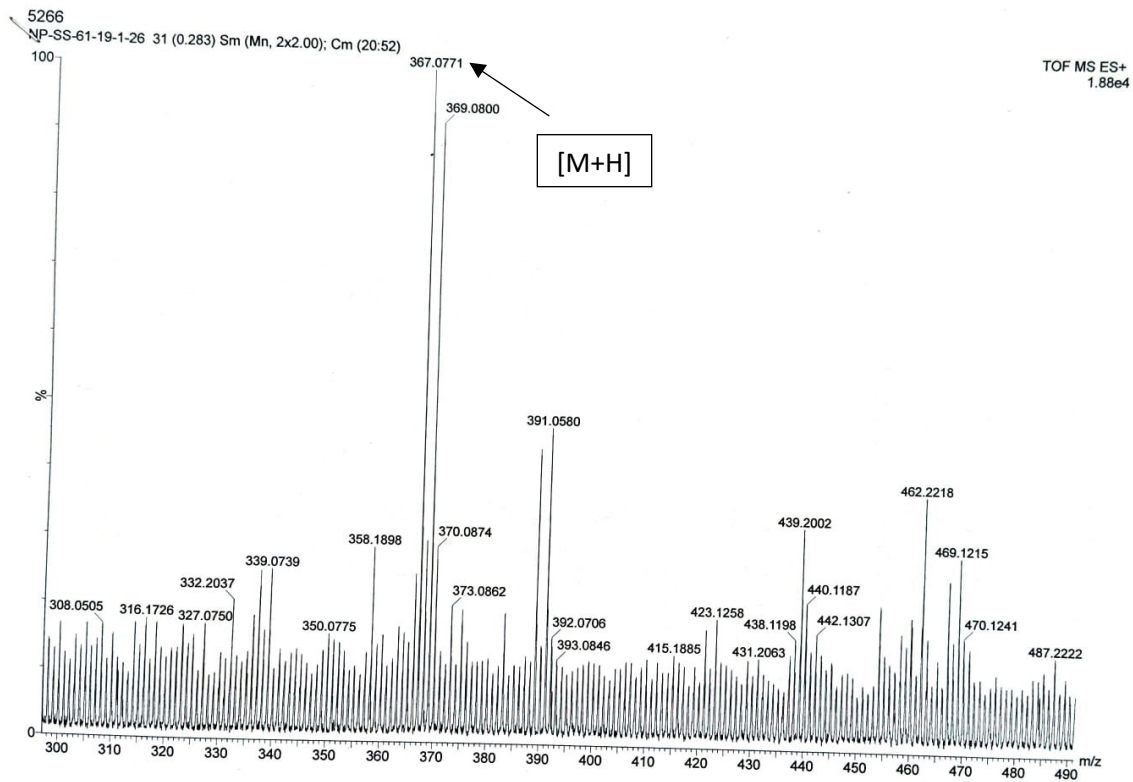

Figure S34. HRMS of compound 2k.

AT(O)SS-362(B)(Furan+DMF-final-1H).1.fid  
AT(O)SS-362(B)-1H

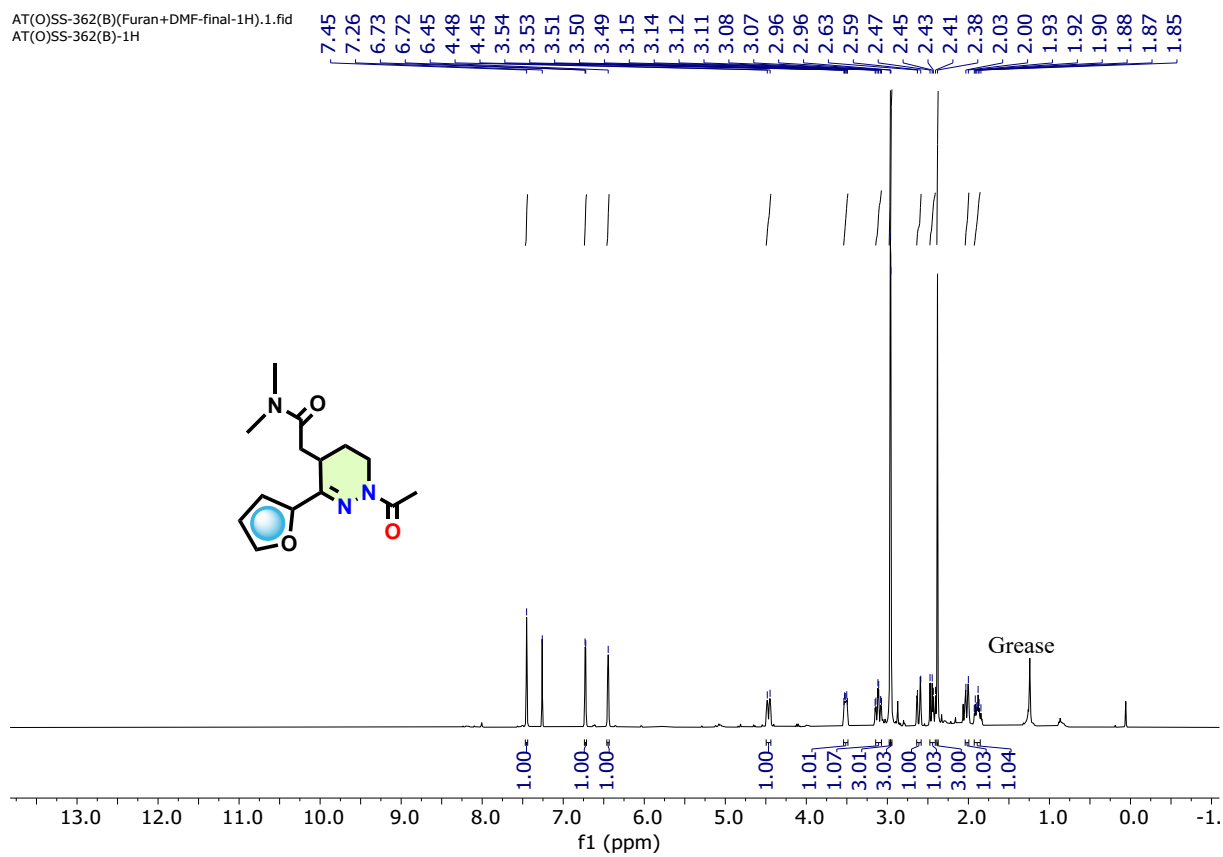

Figure S35.  $^1\text{H}$  (400 MHz) NMR of **2l** compound in  $\text{CDCl}_3$

AT(O)-SS-362A(Furan+DMF-fid)-13C  
AT(O)-SS-362A-13C

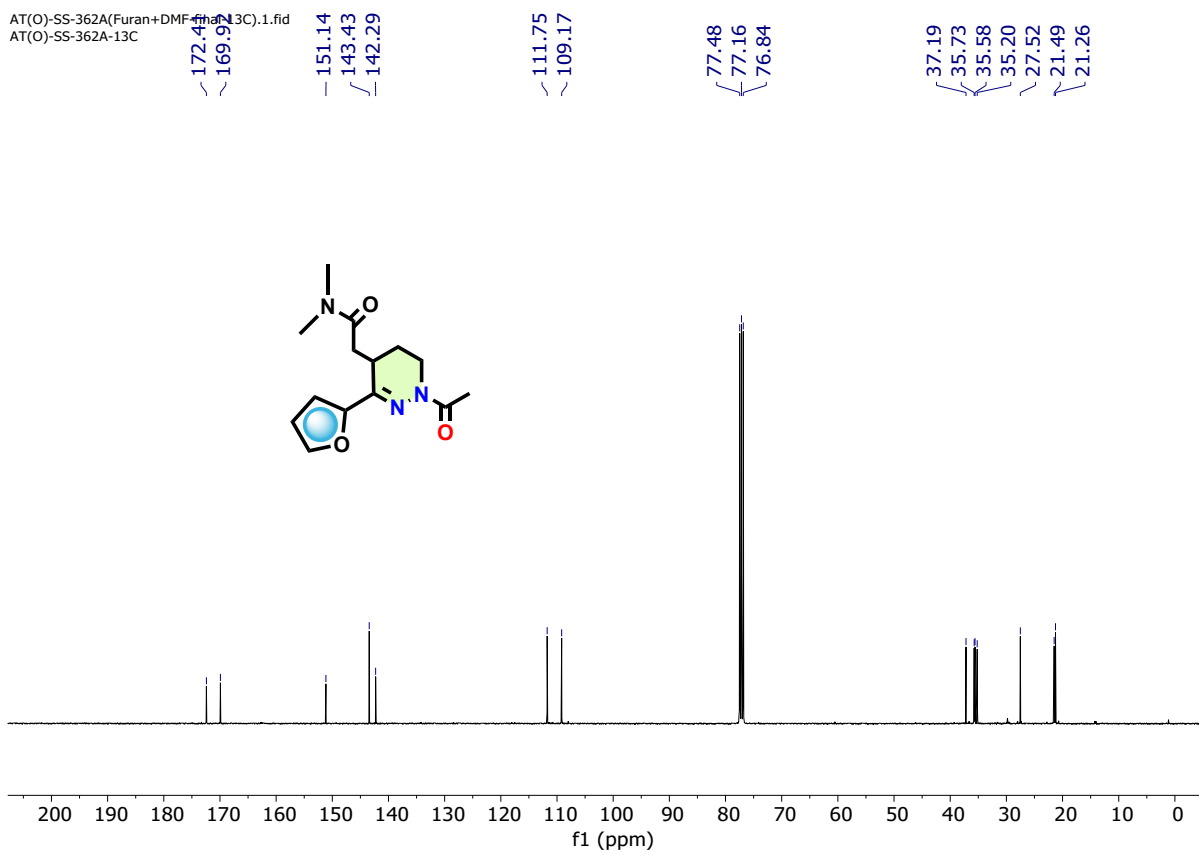

**Figure S36.**  $^{13}\text{C}$  (100 MHz) NMR of **21** compound in  $\text{CDCl}_3$

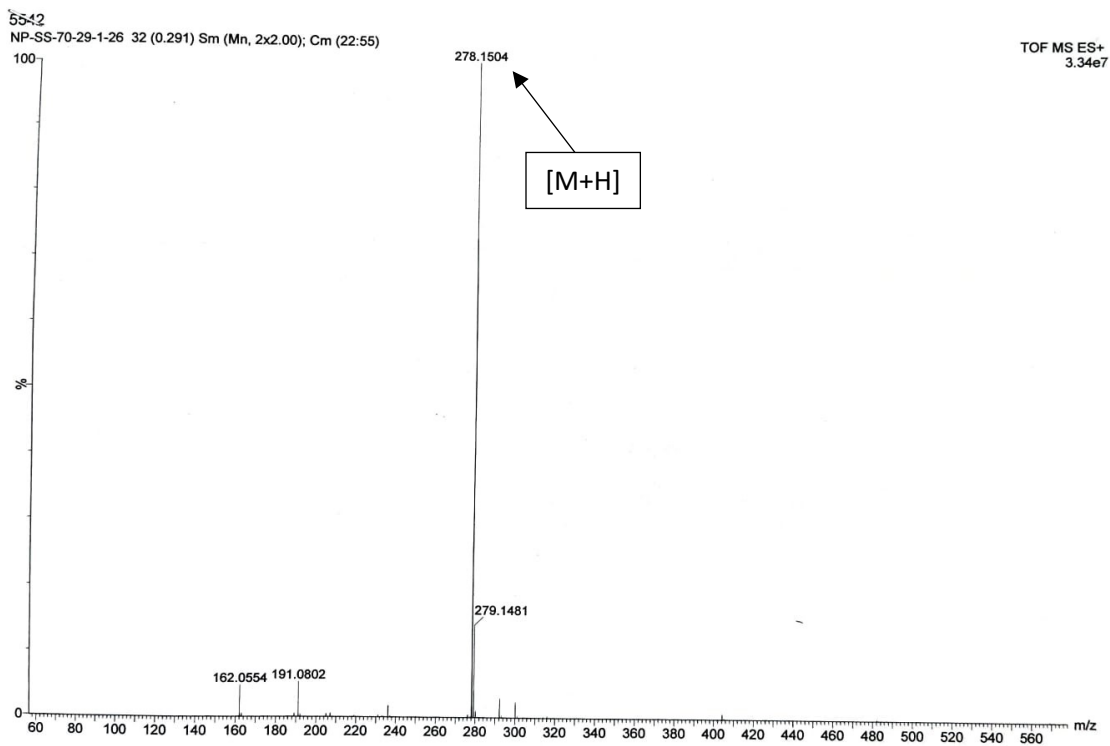

**Figure S37.** HRMS of compound **21**.

AT(O)SS-380-1.1.fid  
AT(O)SS-381-1-1H

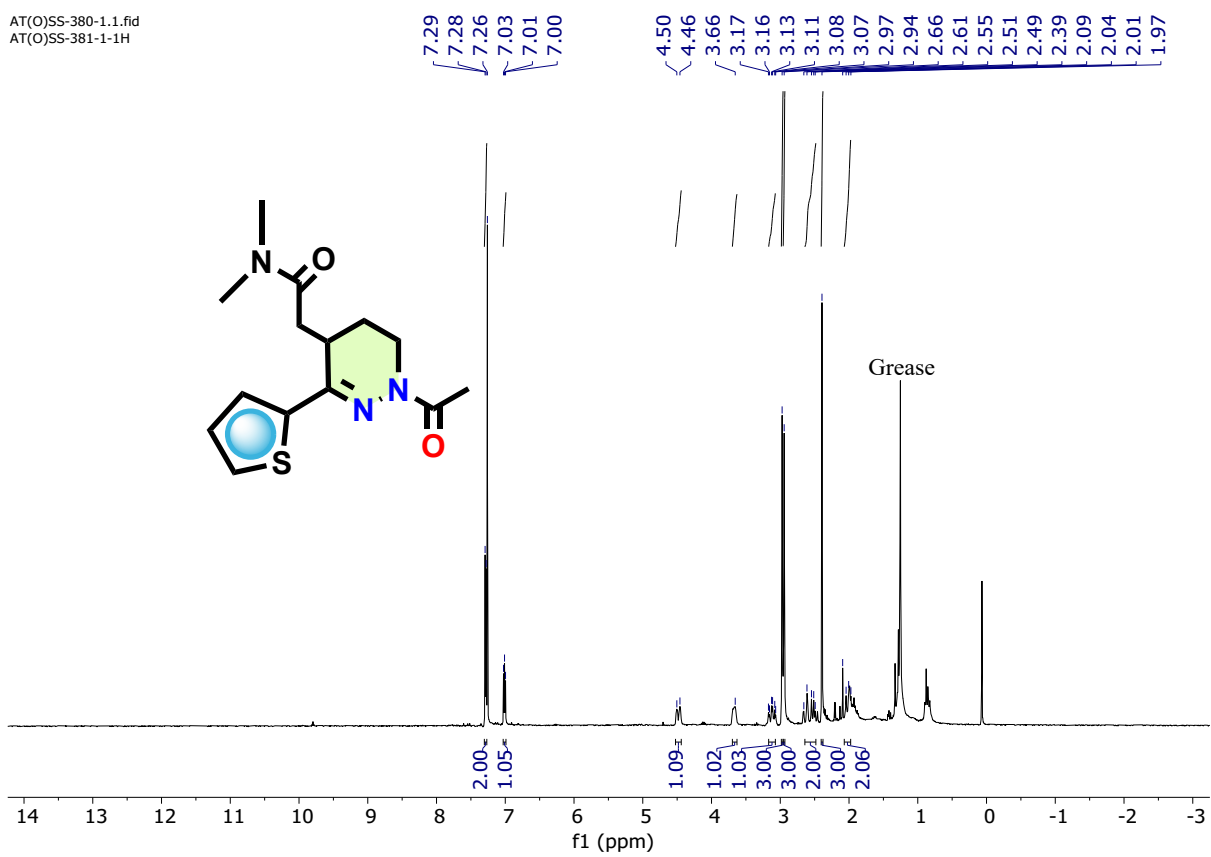

Figure S38. <sup>1</sup>H (300 MHz) NMR of **2m** compound in CDCl<sub>3</sub>

AT(O)-SS-380(A).1.fid  
AT(O)-SS-380(A)-13C

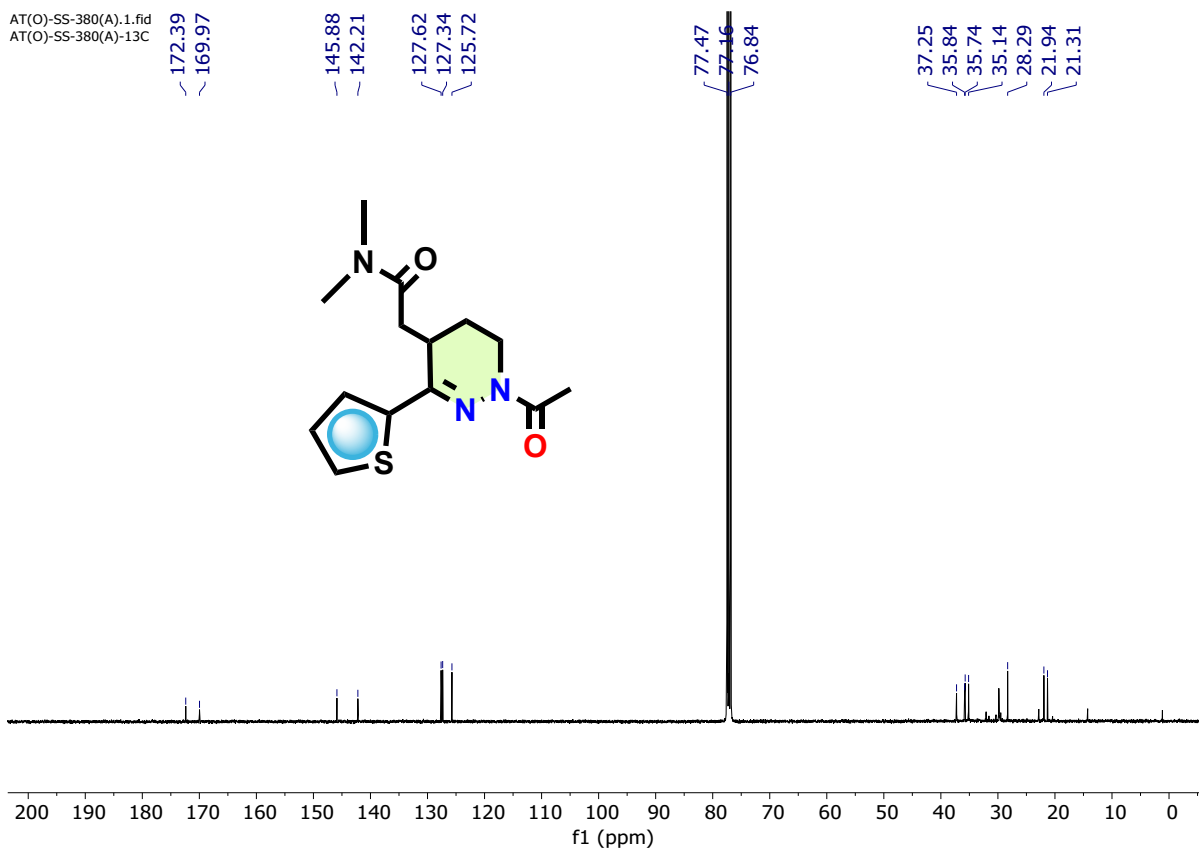

Figure S39.  $^{13}\text{C}$  (100 MHz) NMR of **2m** compound in  $\text{CDCl}_3$

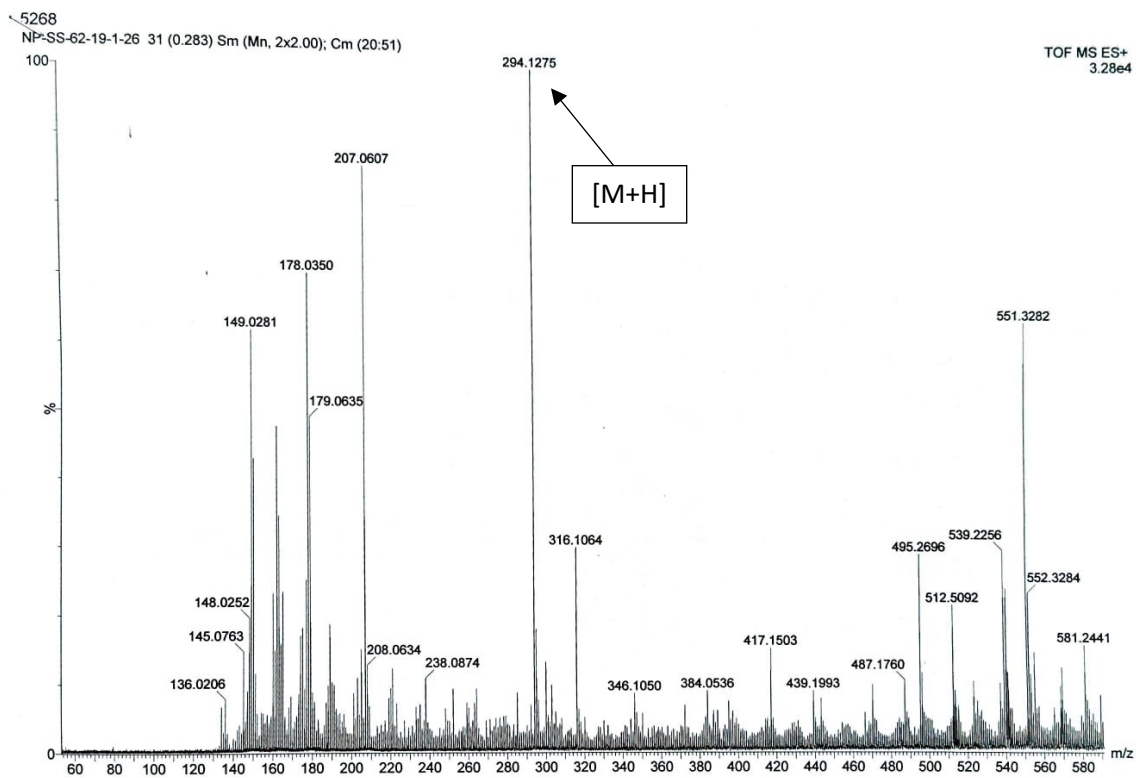

Figure S40. HRMS of compound 2m.

AT(O)SS-427.1.fid  
RKN(O)-J35-RH-1H

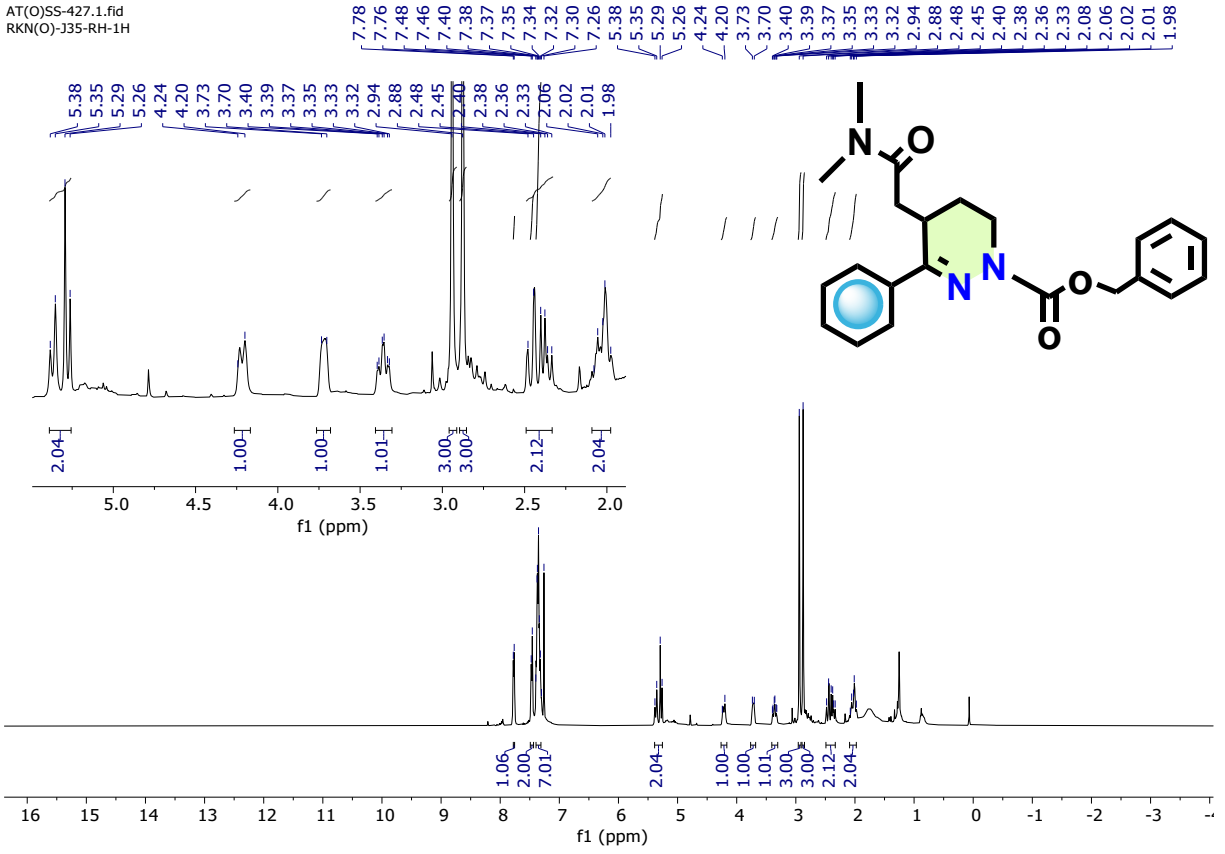

Figure S41. <sup>1</sup>H (400 MHz) NMR of **2n** compound in CDCl<sub>3</sub>

AT(O)SS-426.2.fid  
AT(O)SS-426-13C

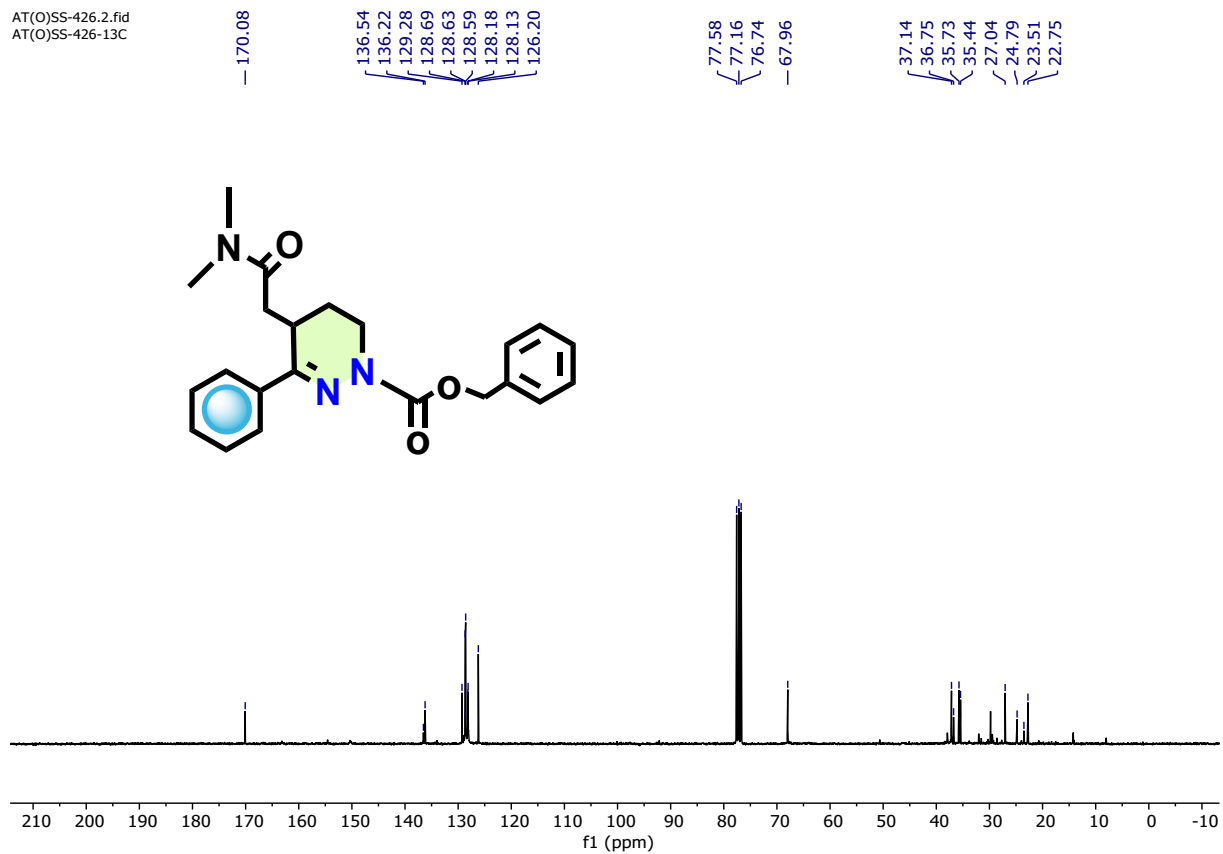

Figure S42.  $^{13}\text{C}$  (75 MHz) NMR of **2n** compound in  $\text{CDCl}_3$

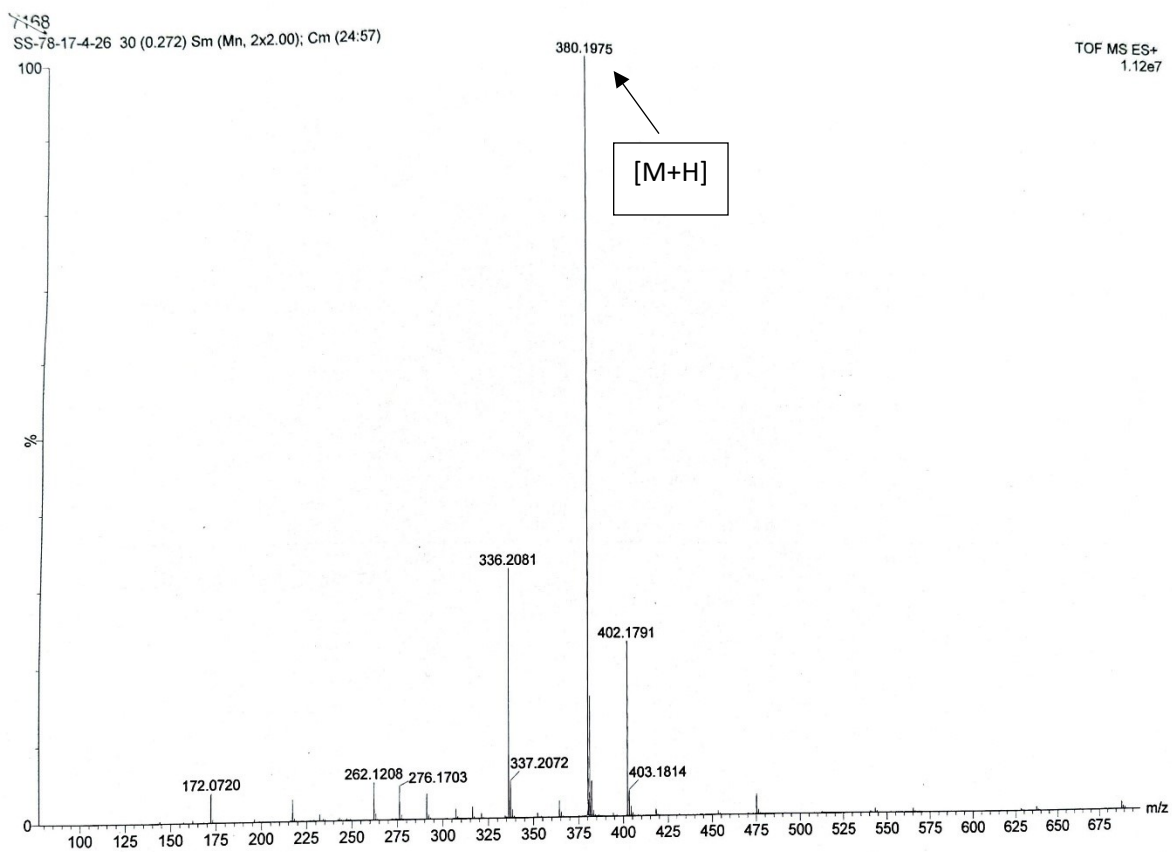

**Figure S43.** HRMS of compound **2n**.

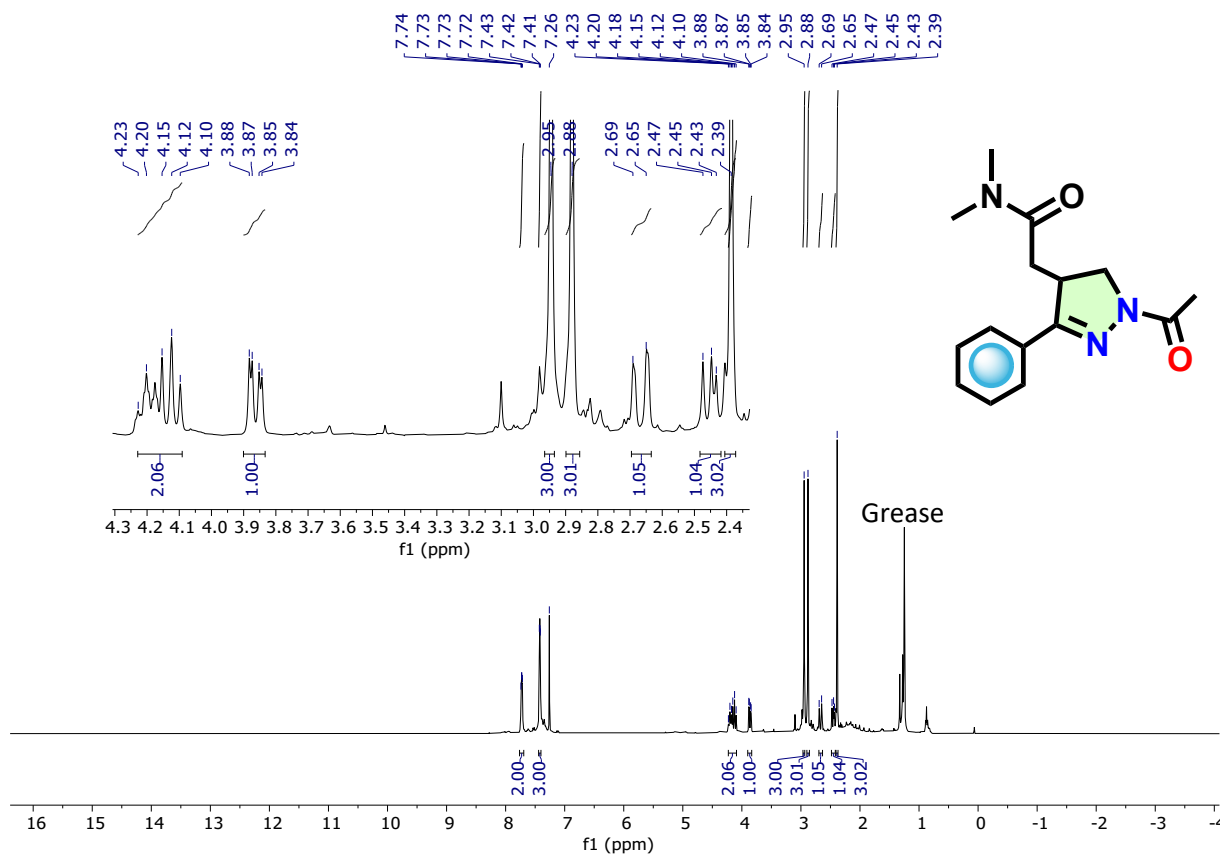

**Figure S44.** <sup>1</sup>H (400 MHz) NMR of **2o** compound in CDCl<sub>3</sub>

AT(O)SS-423(A).1.fid  
AT(O)SS-423(A)-13C

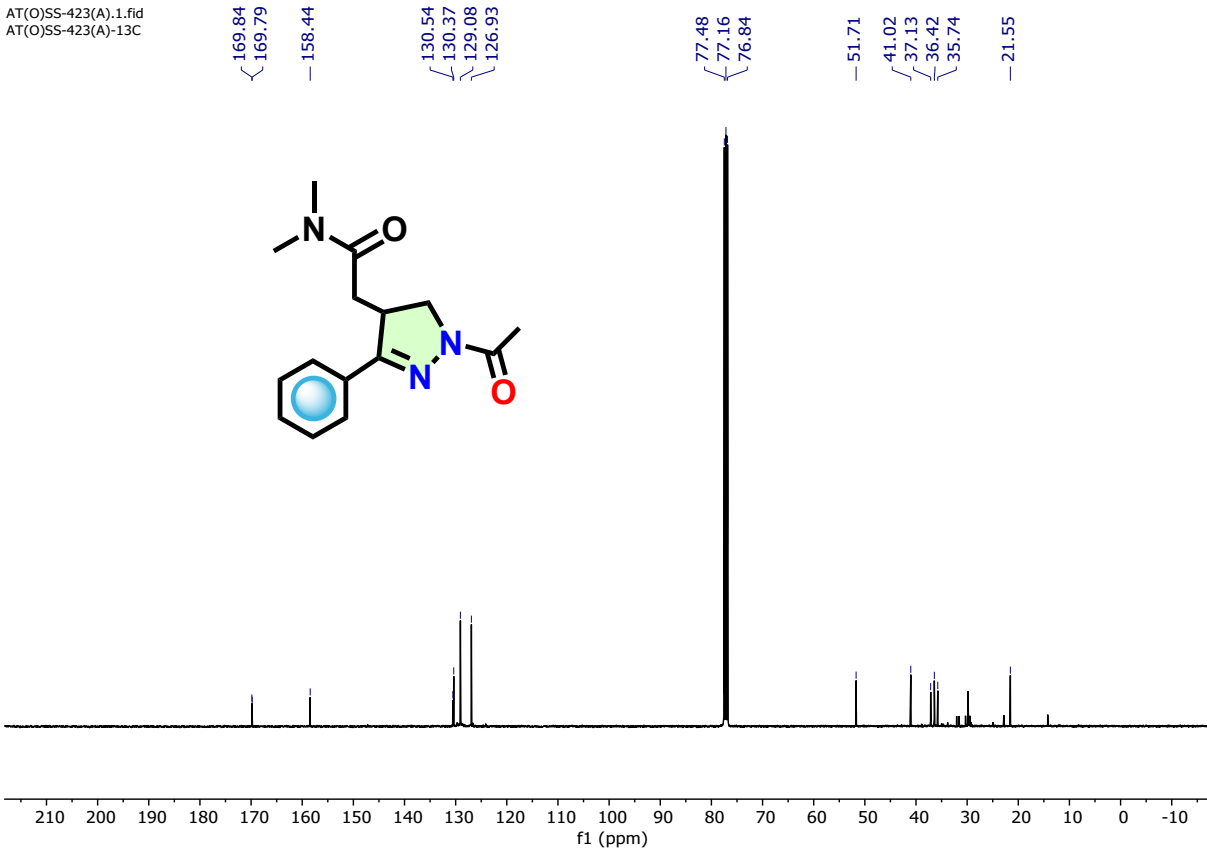

Figure S45.  $^{13}\text{C}$  (100 MHz) NMR of **2o** compound in  $\text{CDCl}_3$

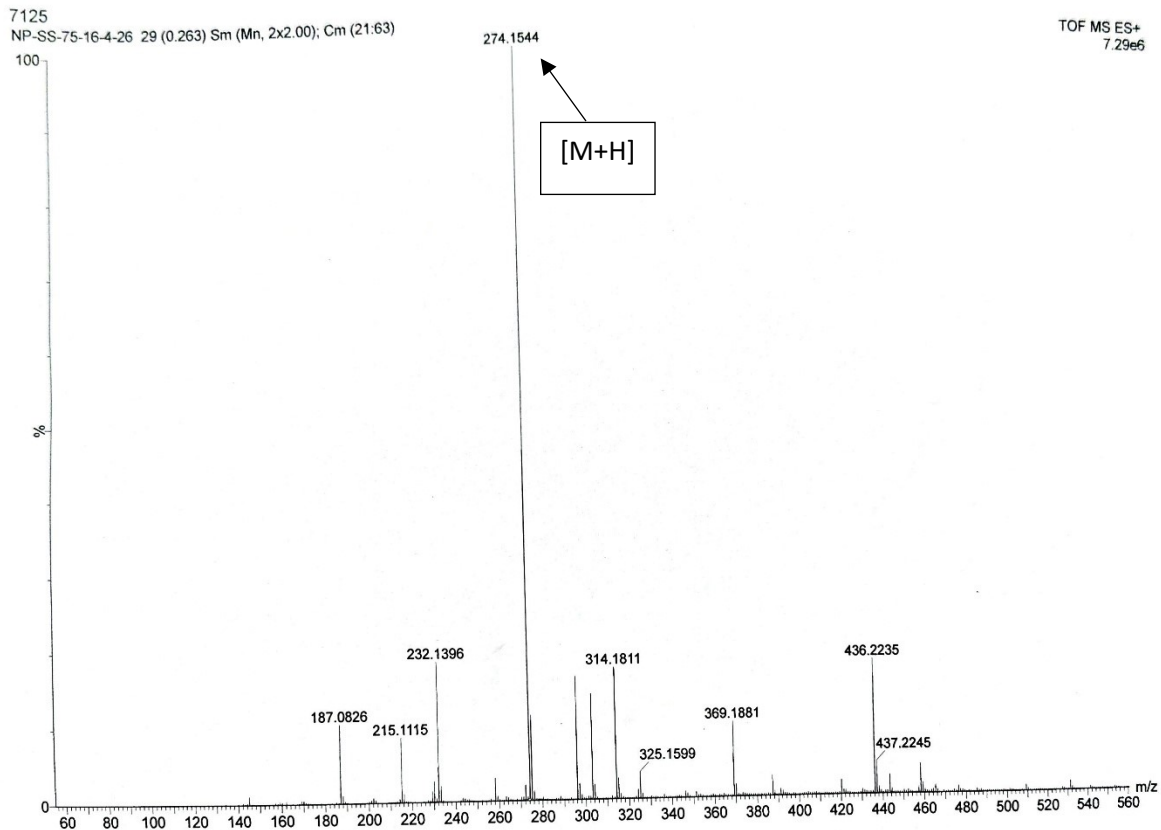

Figure S46. HRMS of compound 20.

AT(O)SS-424.1.fid  
AT(O)SS-424-1H

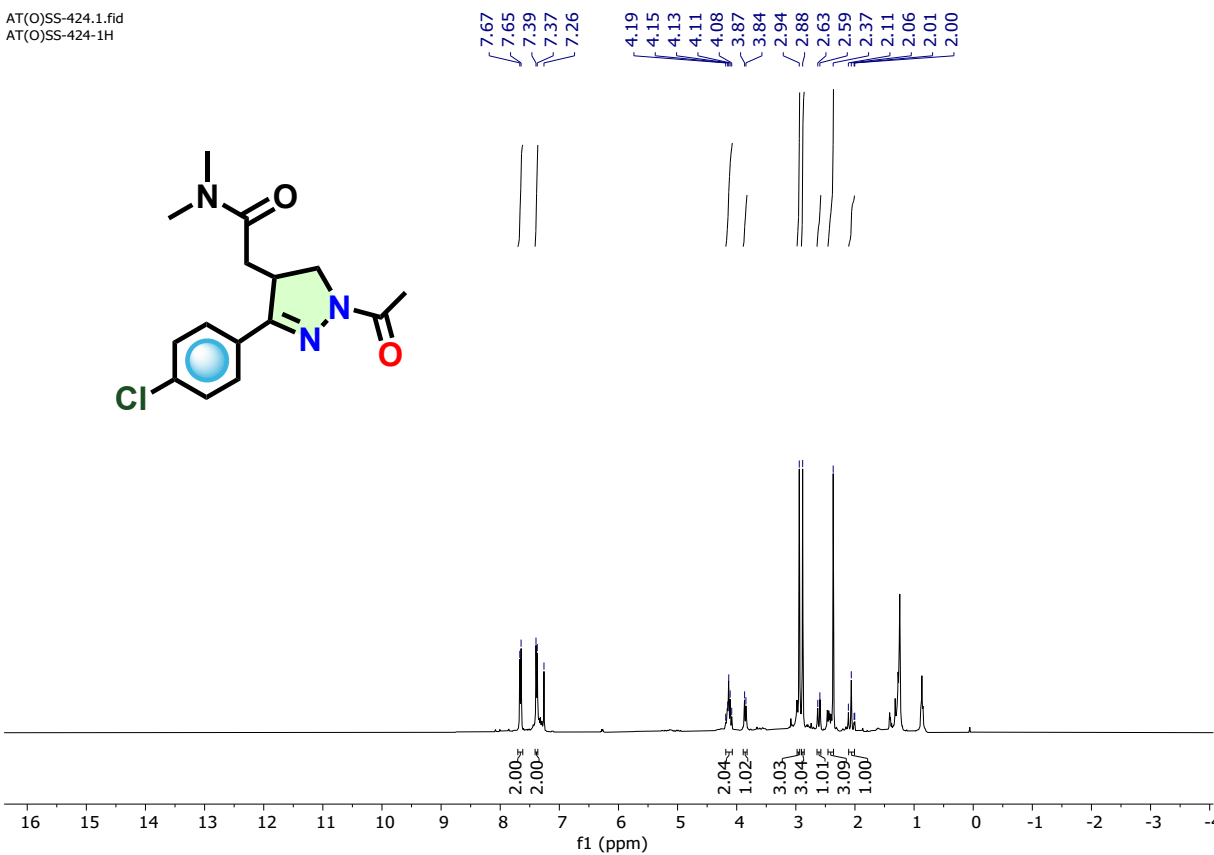

Figure S47. <sup>1</sup>H (400 MHz) NMR of **2p** compound in CDCl<sub>3</sub>.

AT(O)SS-424(A).1.fid  
AT(O)SS-424(A)-13C

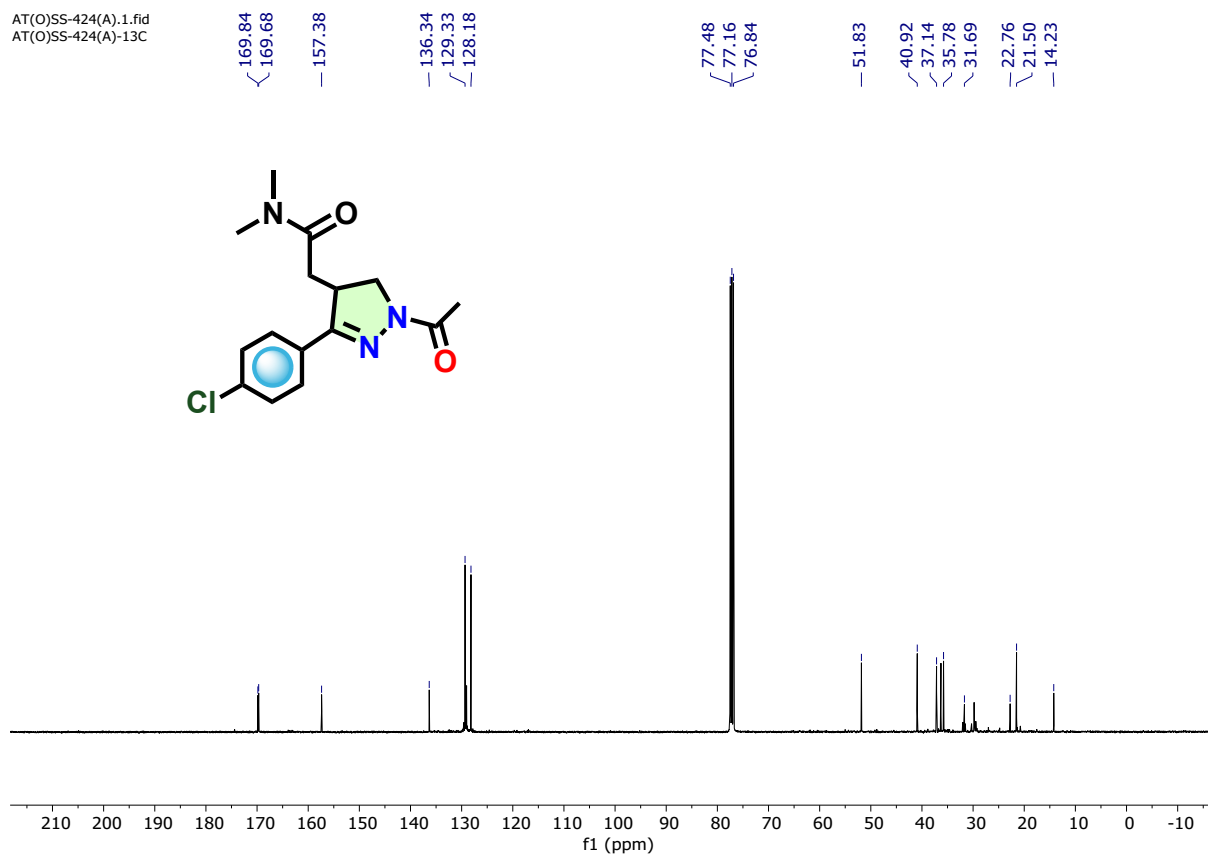

Figure S48.  $^{13}\text{C}$  (100 MHz) NMR of **2p** compound in  $\text{CDCl}_3$ .

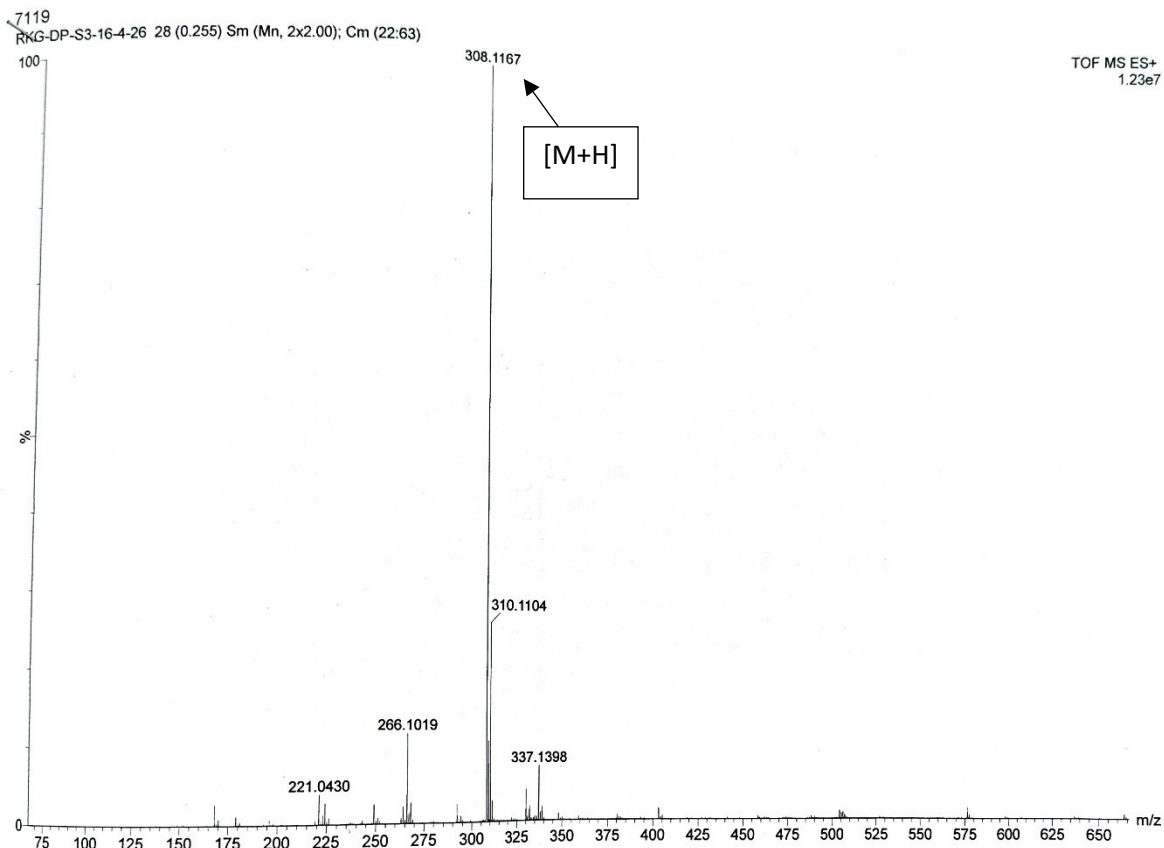

**Figure S49.** HRMS of compound **2p**.

AT(O)SS-425(4-Me+allyl+DMF-F)-1H+13C.1.fid  
AT(O)SS-425-1H

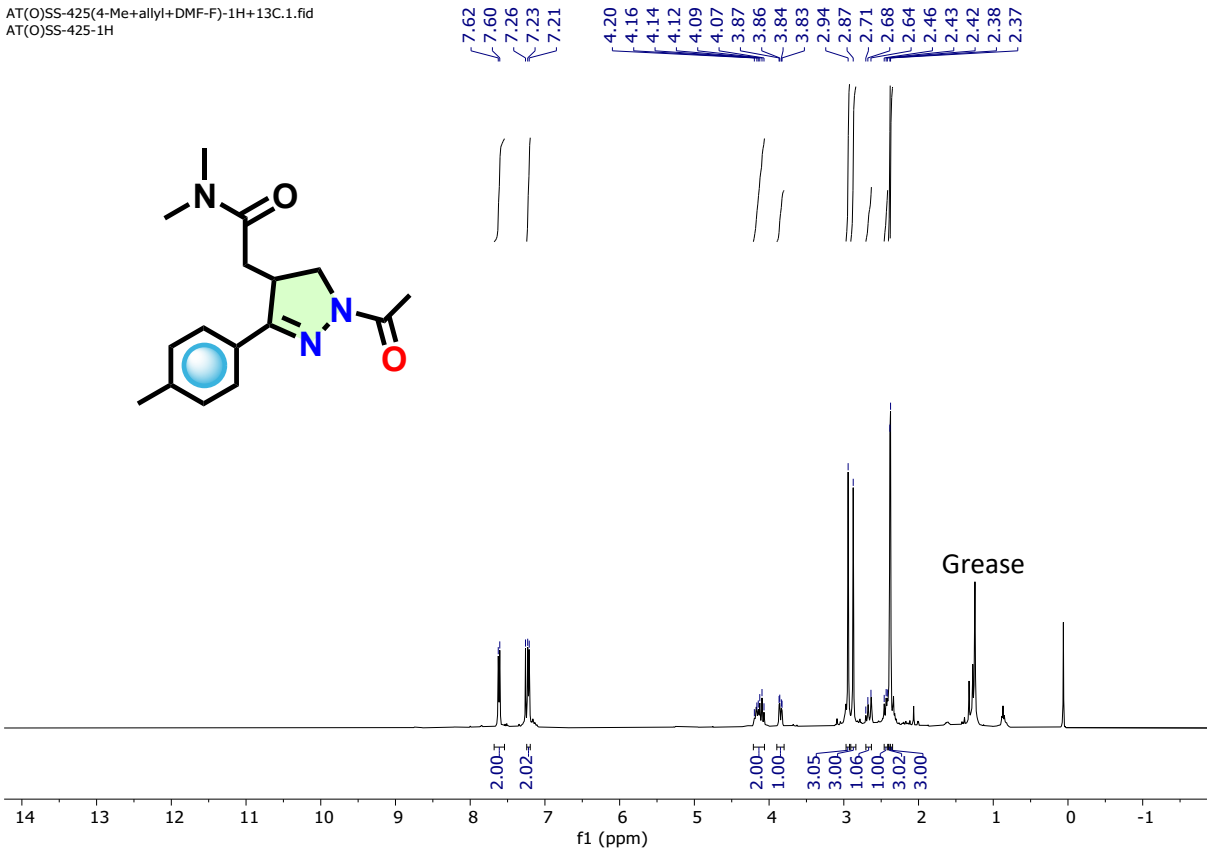

Figure S50.  $^1\text{H}$  (400 MHz) NMR of **2q** compound in  $\text{CDCl}_3$ .

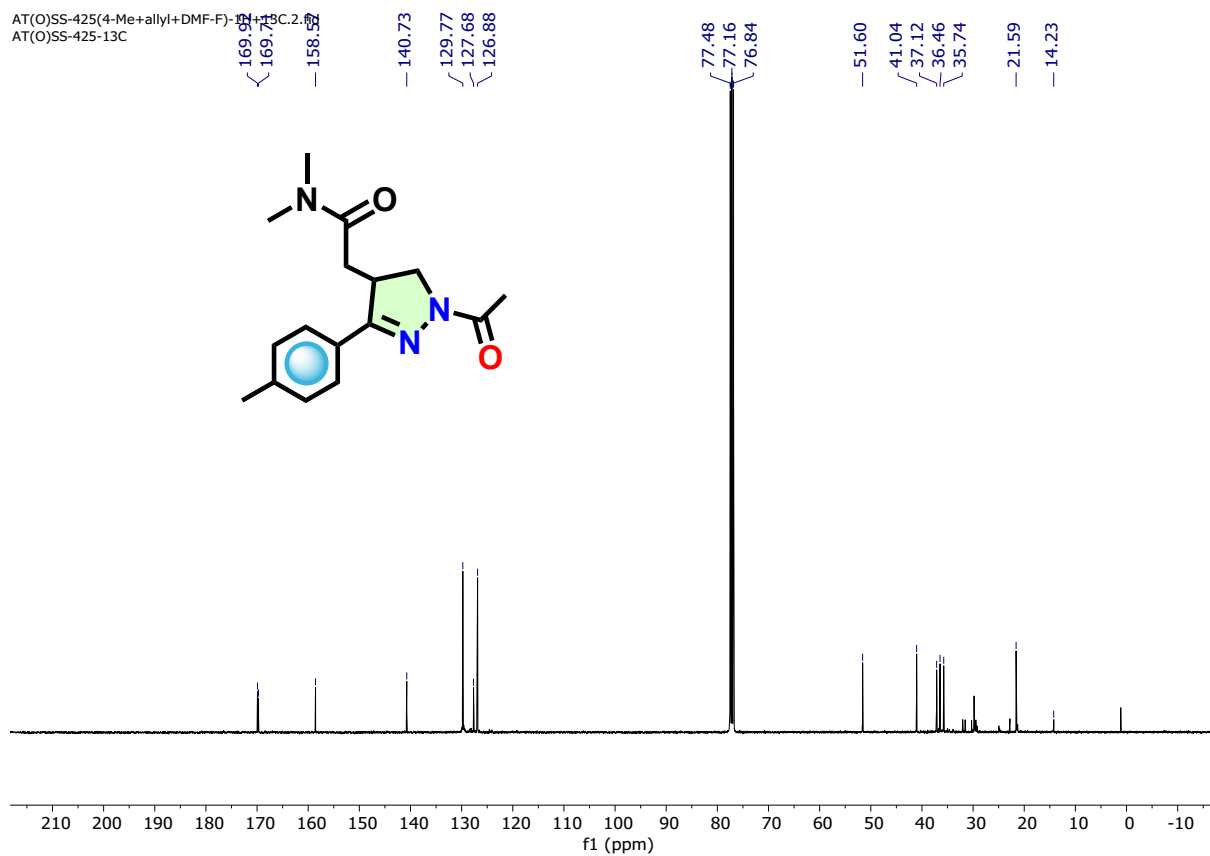

Figure S51.  $^{13}\text{C}$  (100 MHz) NMR of **2q** compound in  $\text{CDCl}_3$ .

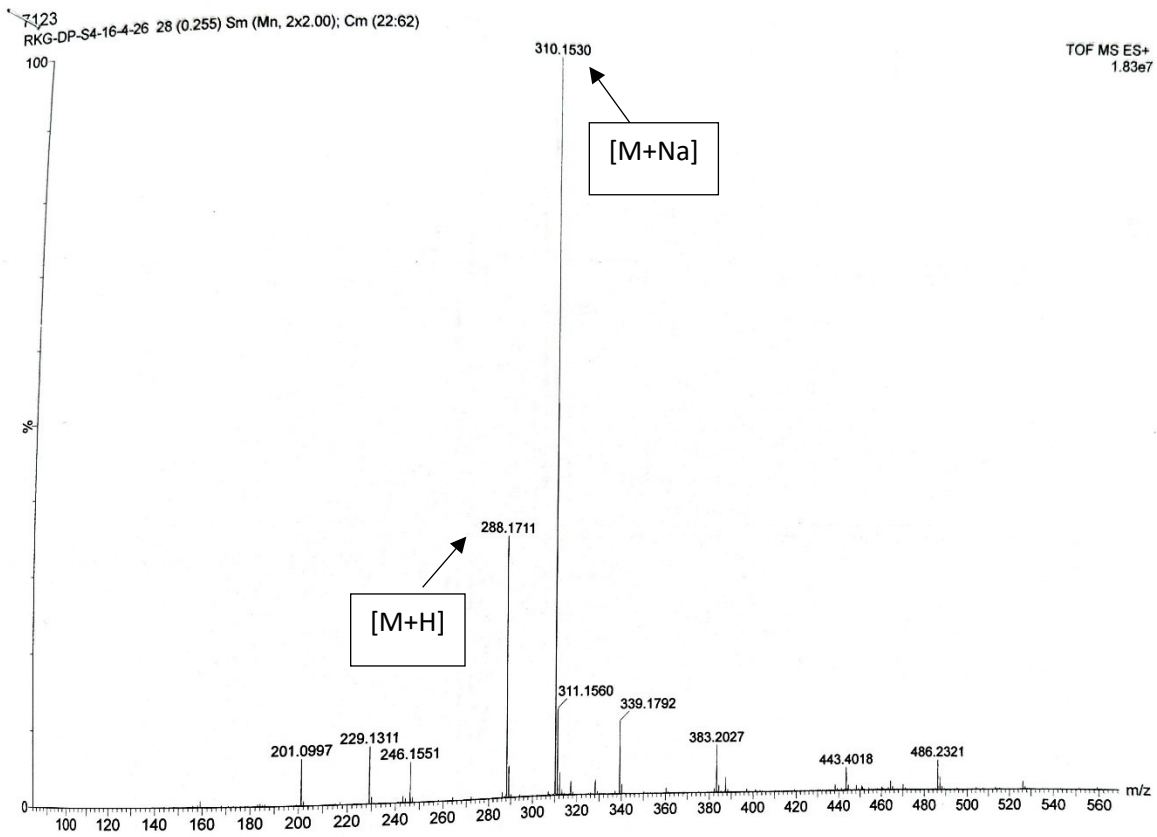

Figure S52. HRMS of compound 2q.

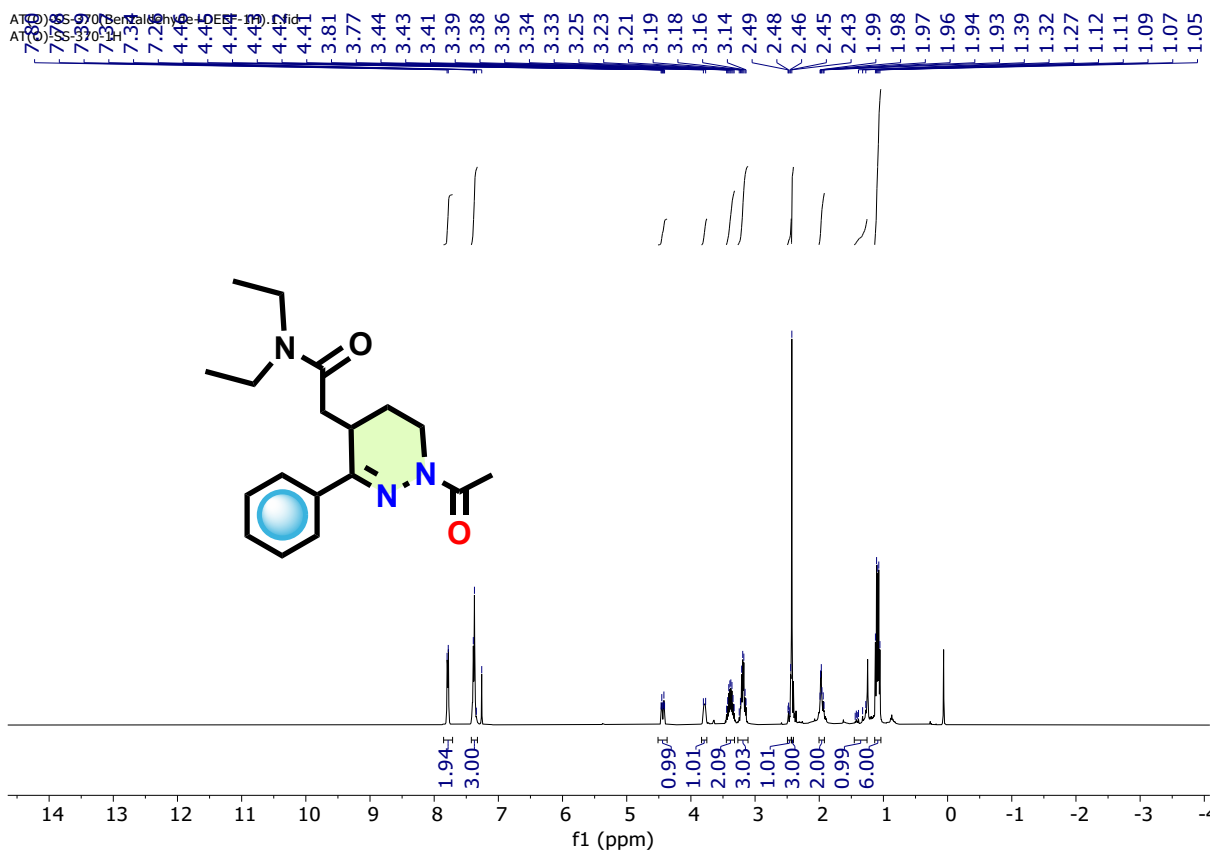

Figure S53. <sup>1</sup>H (400 MHz) NMR of **2r** compound in CDCl<sub>3</sub>

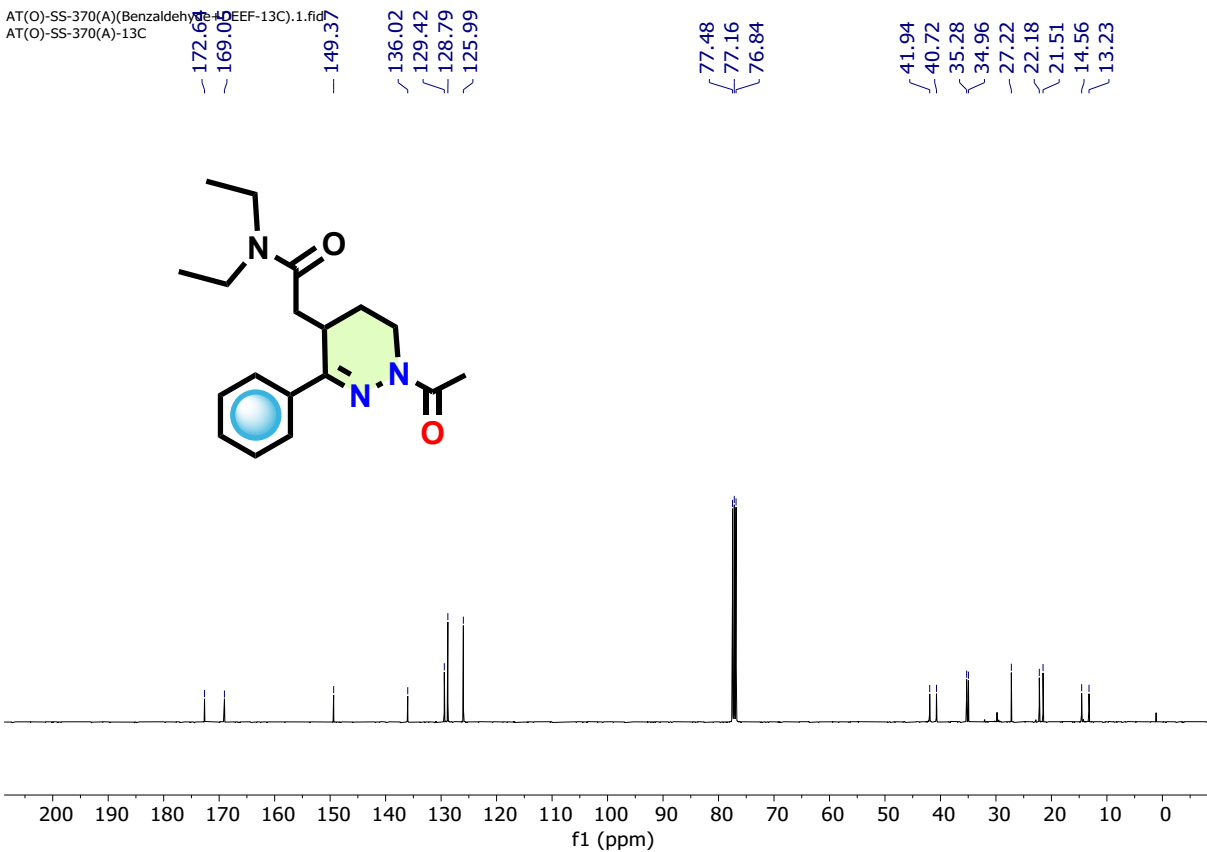

**Figure 54**  $^{13}\text{C}$  (100 MHz) NMR of **2r** compound in  $\text{CDCl}_3$

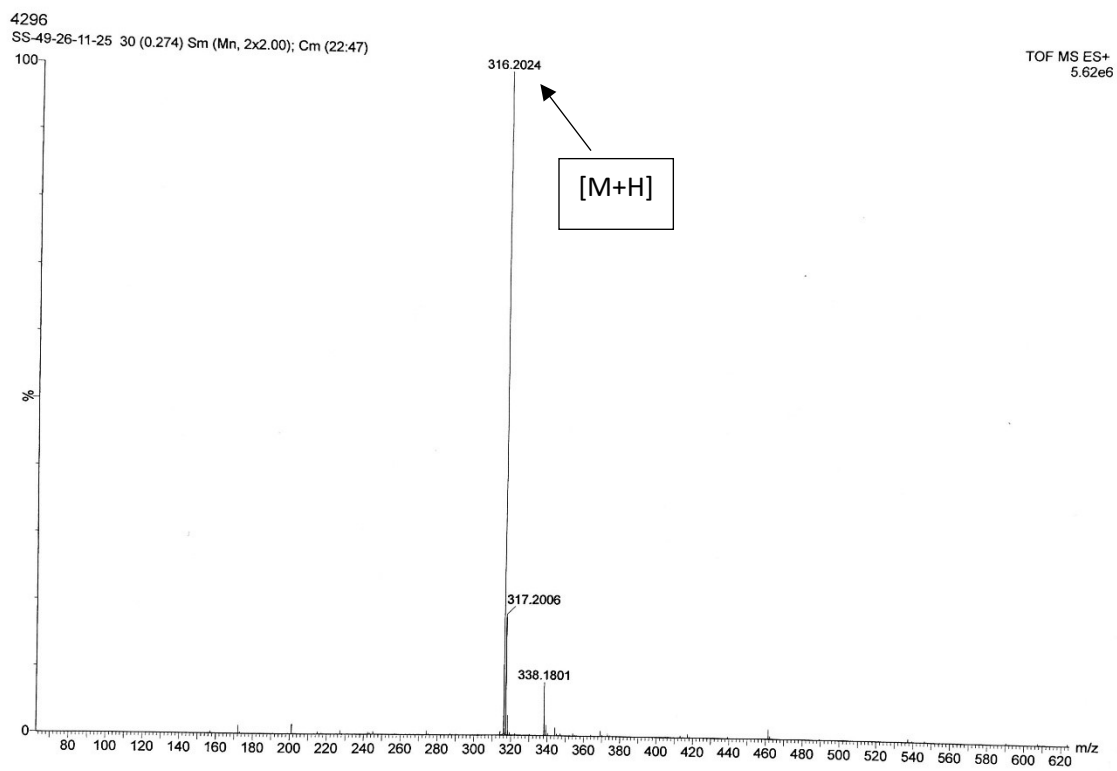

**Figure S55.** HRMS of compound **2r**.

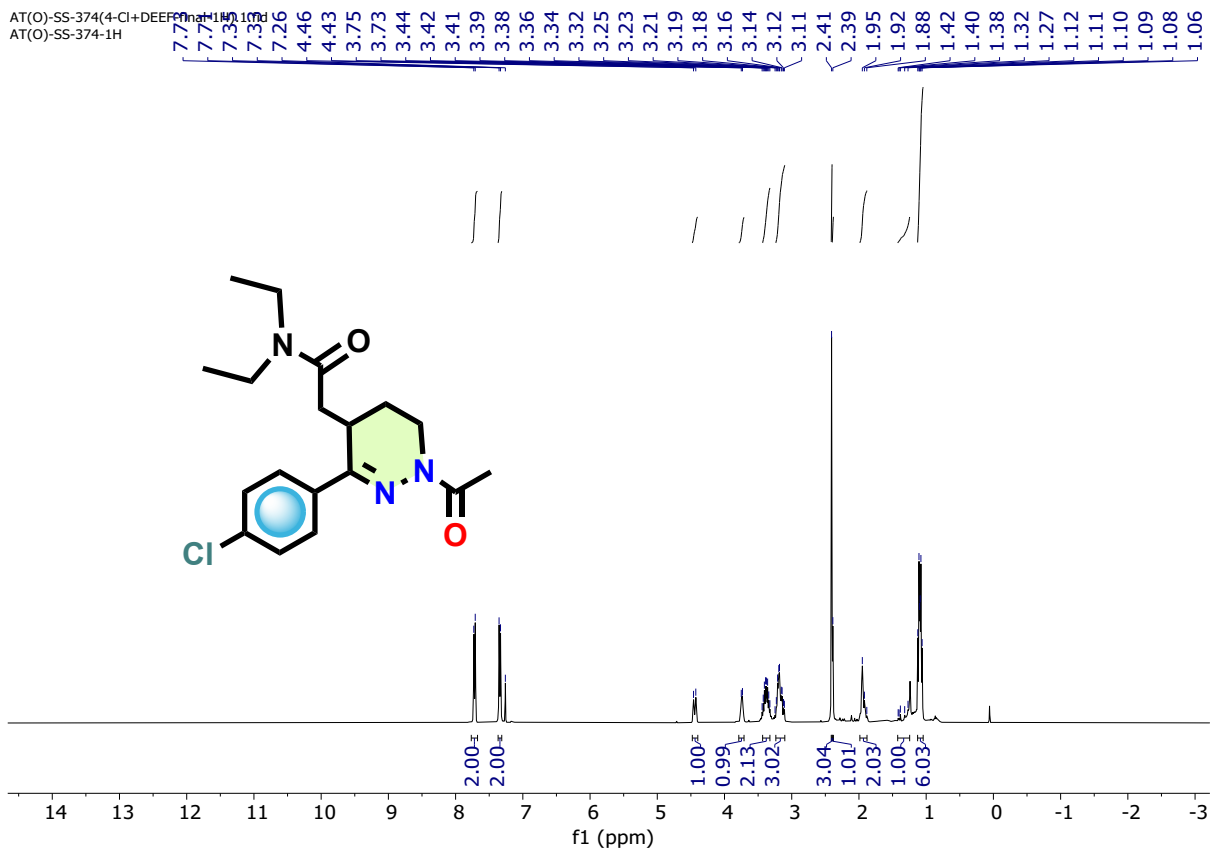

Figure S56. <sup>1</sup>H (400 MHz) NMR of **2s** compound in CDCl<sub>3</sub>

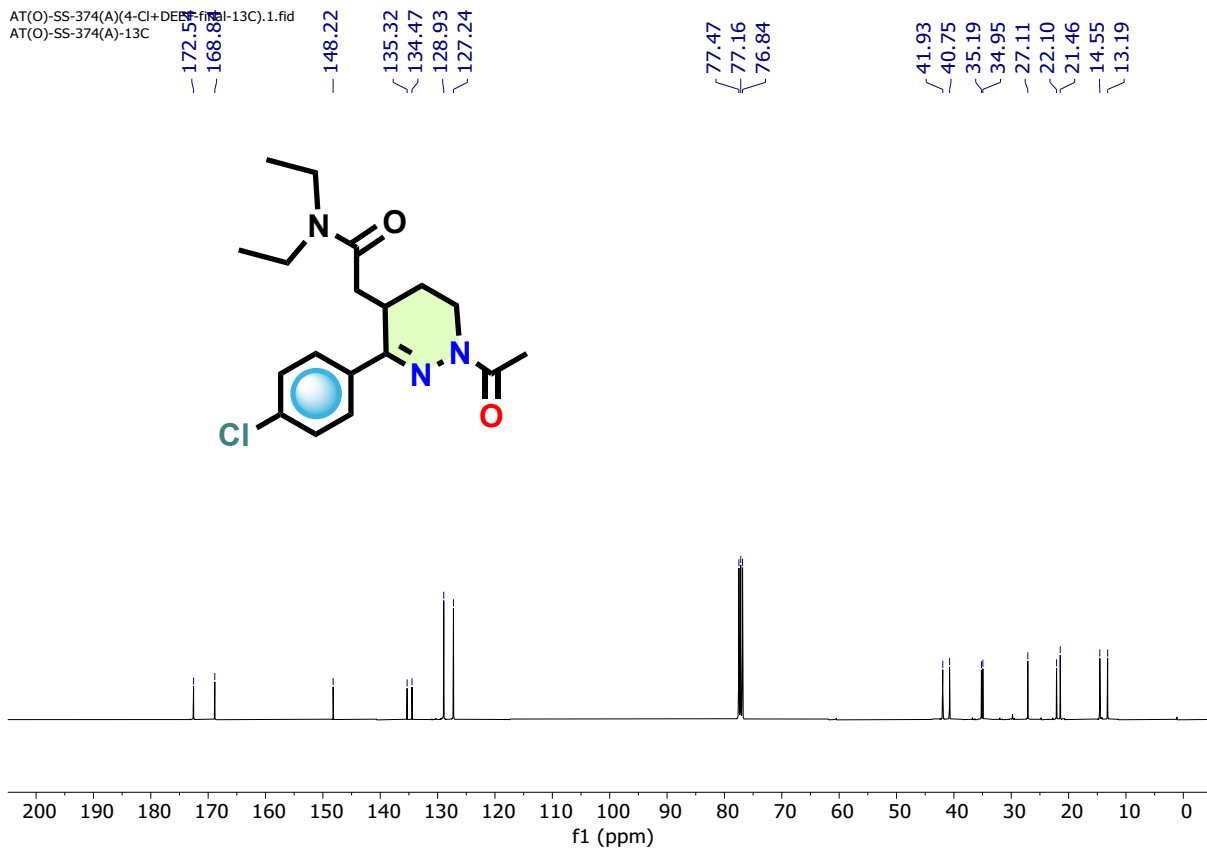

Figure S57.  $^{13}\text{C}$  (100 MHz) NMR of **2s** compound in  $\text{CDCl}_3$

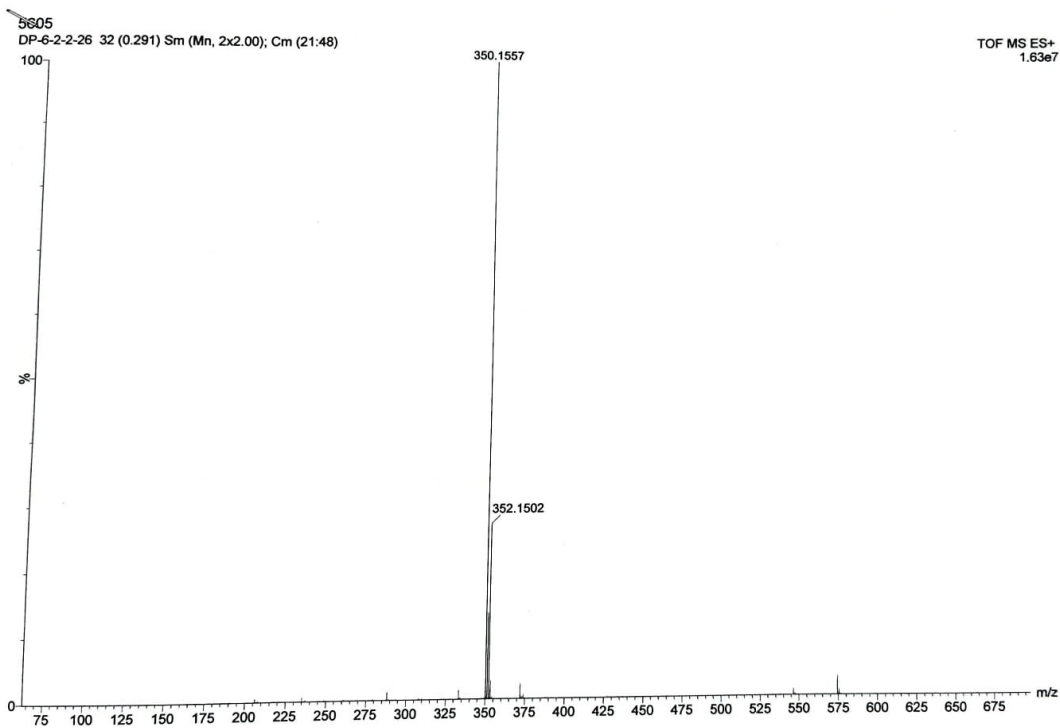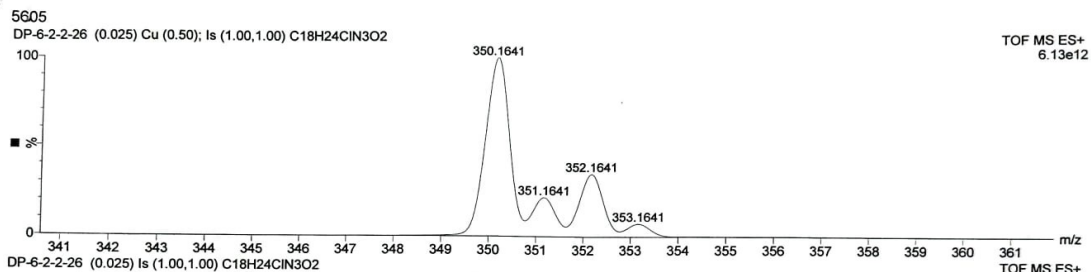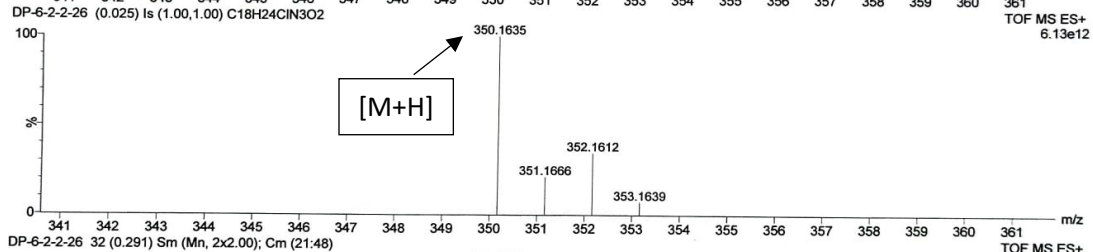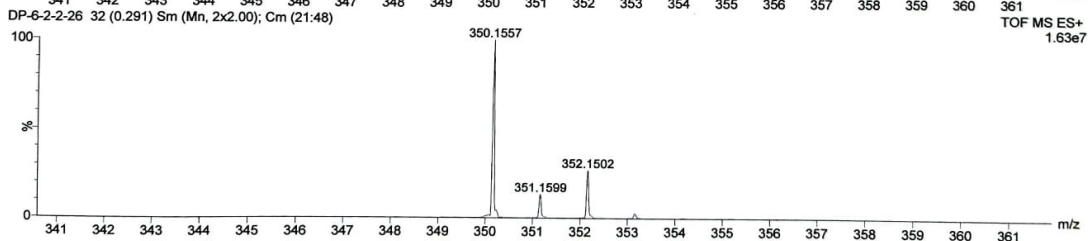

Figure S58. HRMS of compound 2s.

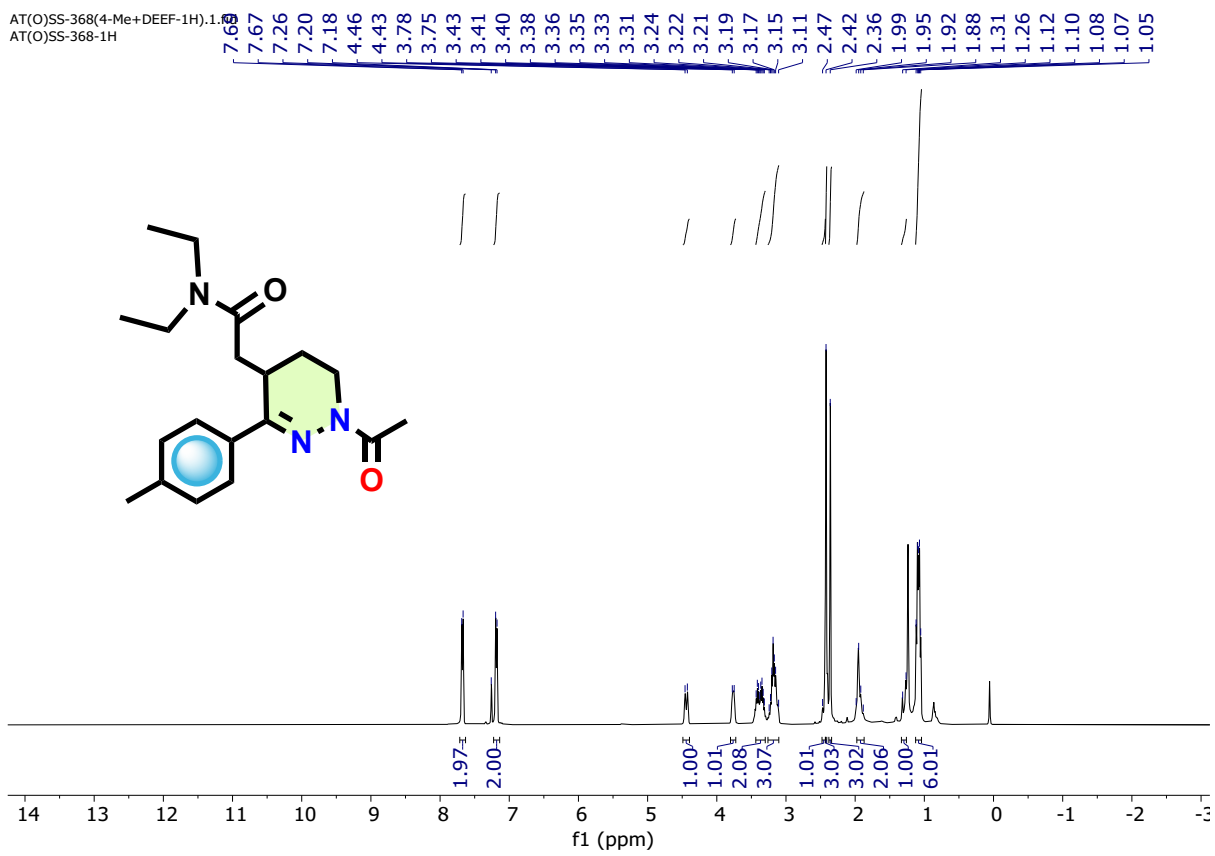

Figure S59. <sup>1</sup>H (400 MHz) NMR of **2t** compound in CDCl<sub>3</sub>

AT(O)-SS-368(A)(4-Me+DEE).1.fid  
AT(O)-SS-368(A)-13C

172.61  
169.18

149.53

139.55

133.23

129.48

125.92

77.47

77.16

76.84

41.92

40.69

35.22

34.97

27.18

22.15

21.50

21.37

14.55

13.22

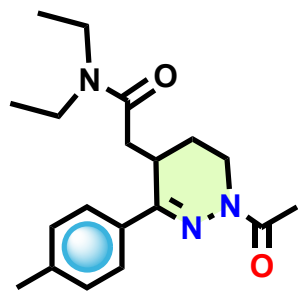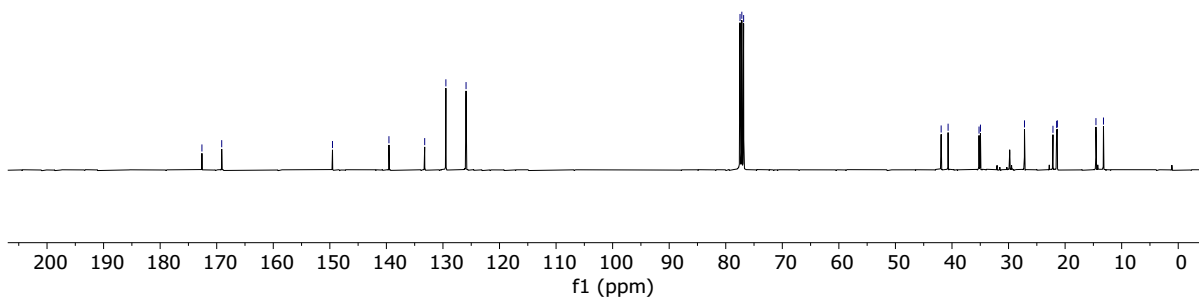

Figure S60.  $^{13}\text{C}$  (100 MHz) NMR of **2t** compound in  $\text{CDCl}_3$

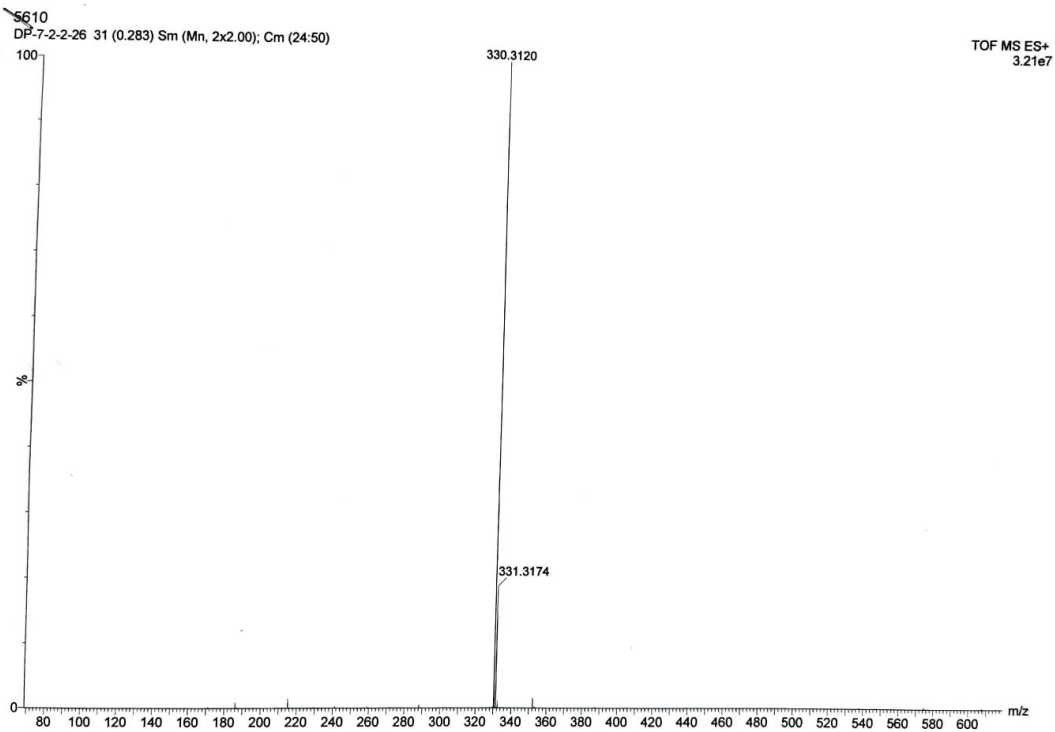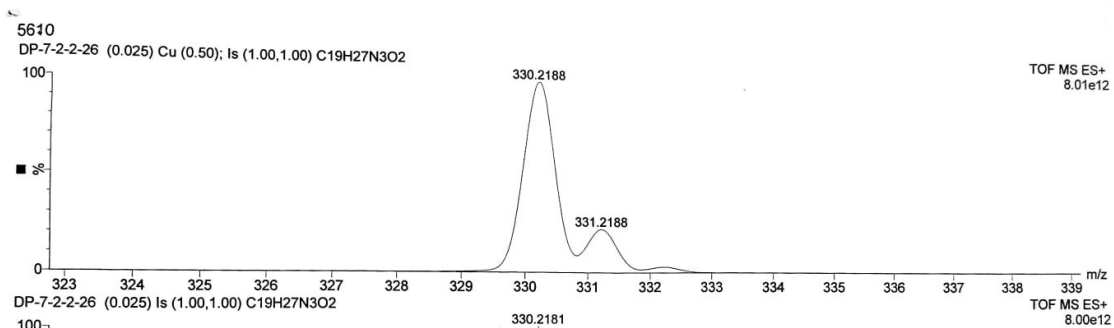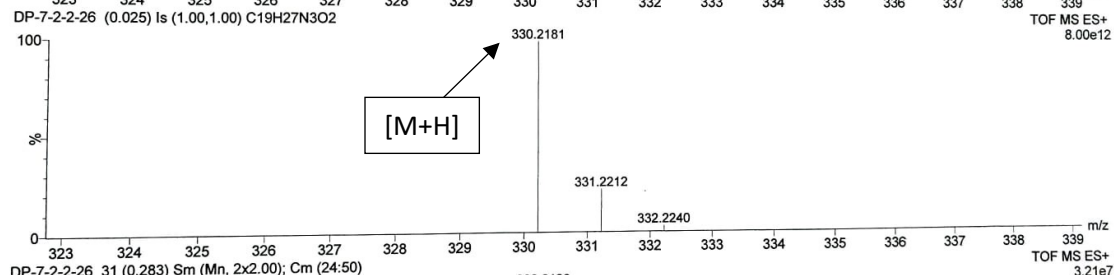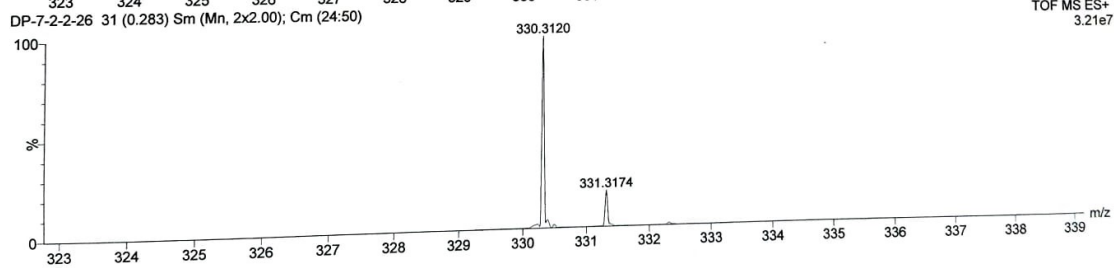

Figure S61. HRMS of compound 2t.

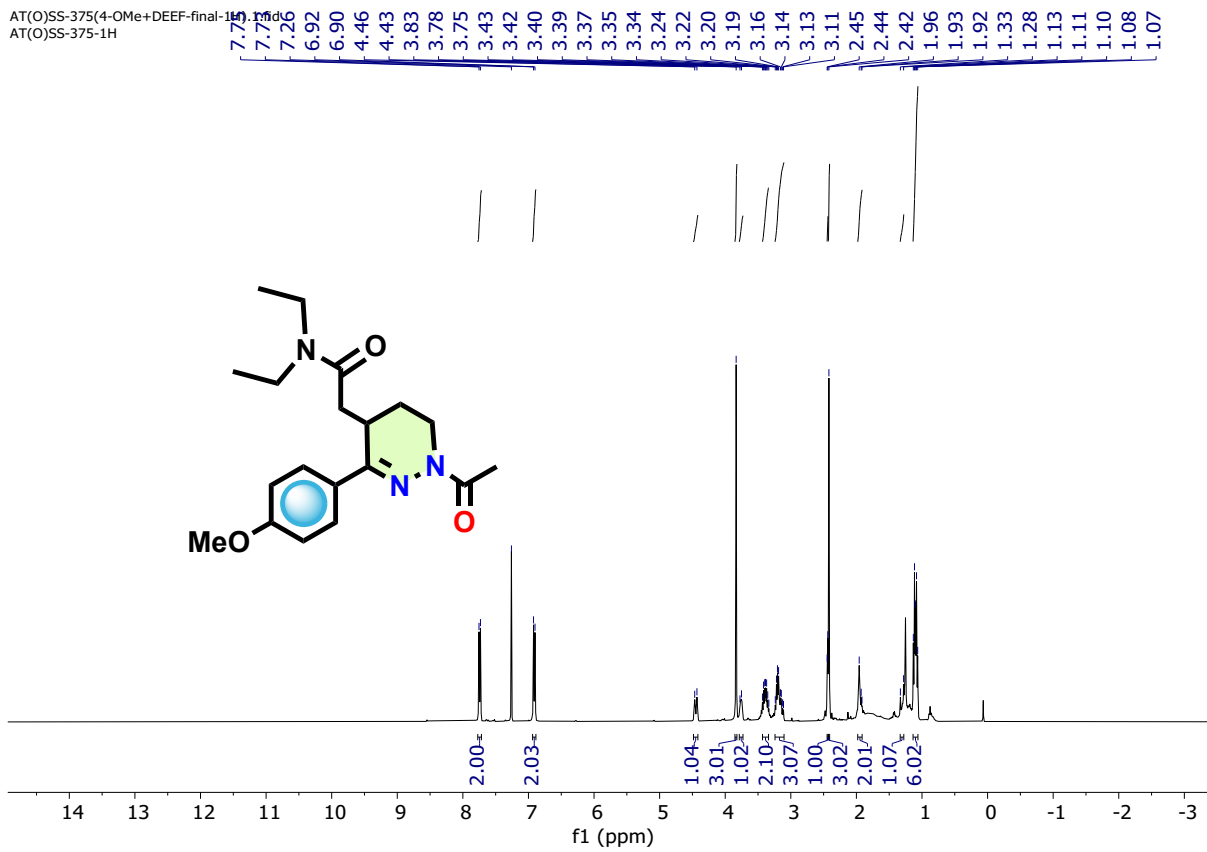

Figure S62.  $^1\text{H}$  (400 MHz) NMR of **2u** compound in  $\text{CDCl}_3$

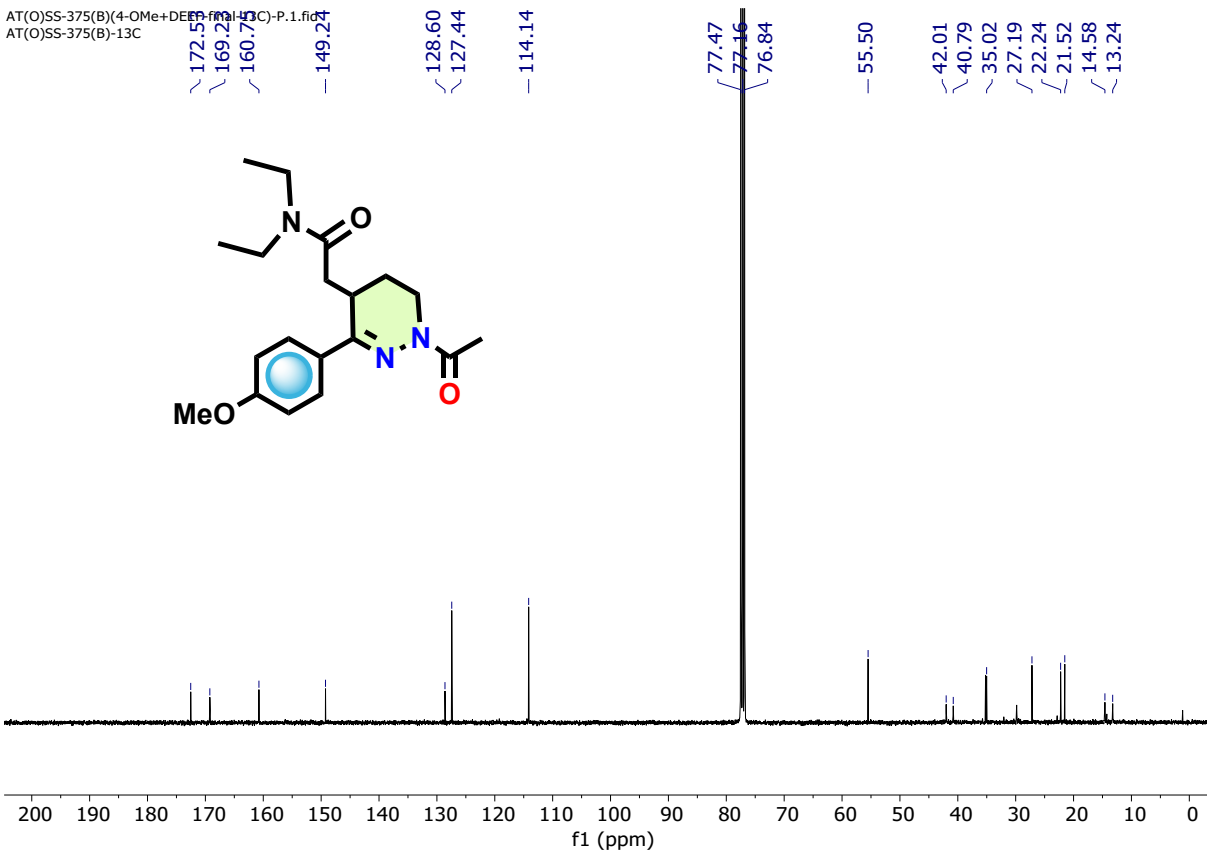

Figure S63.  $^{13}\text{C}$  (100 MHz) NMR of **2u** compound in  $\text{CDCl}_3$

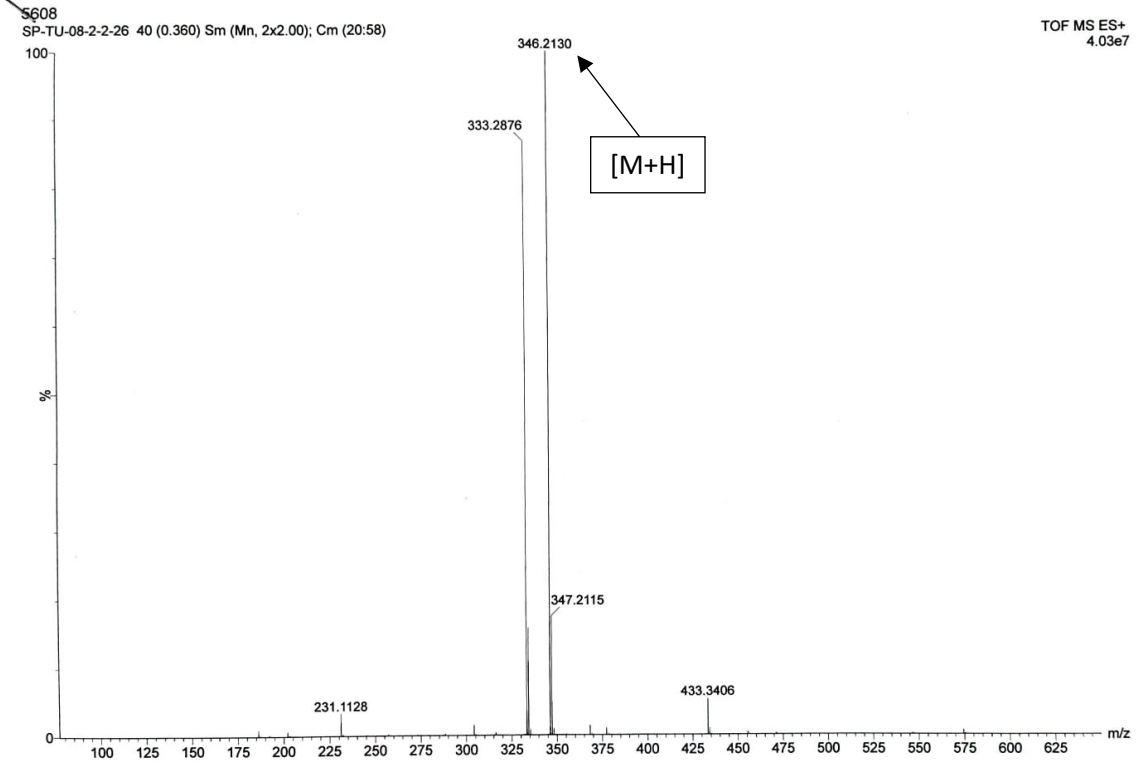

**Figure S64.** HRMS of compound **2u**.

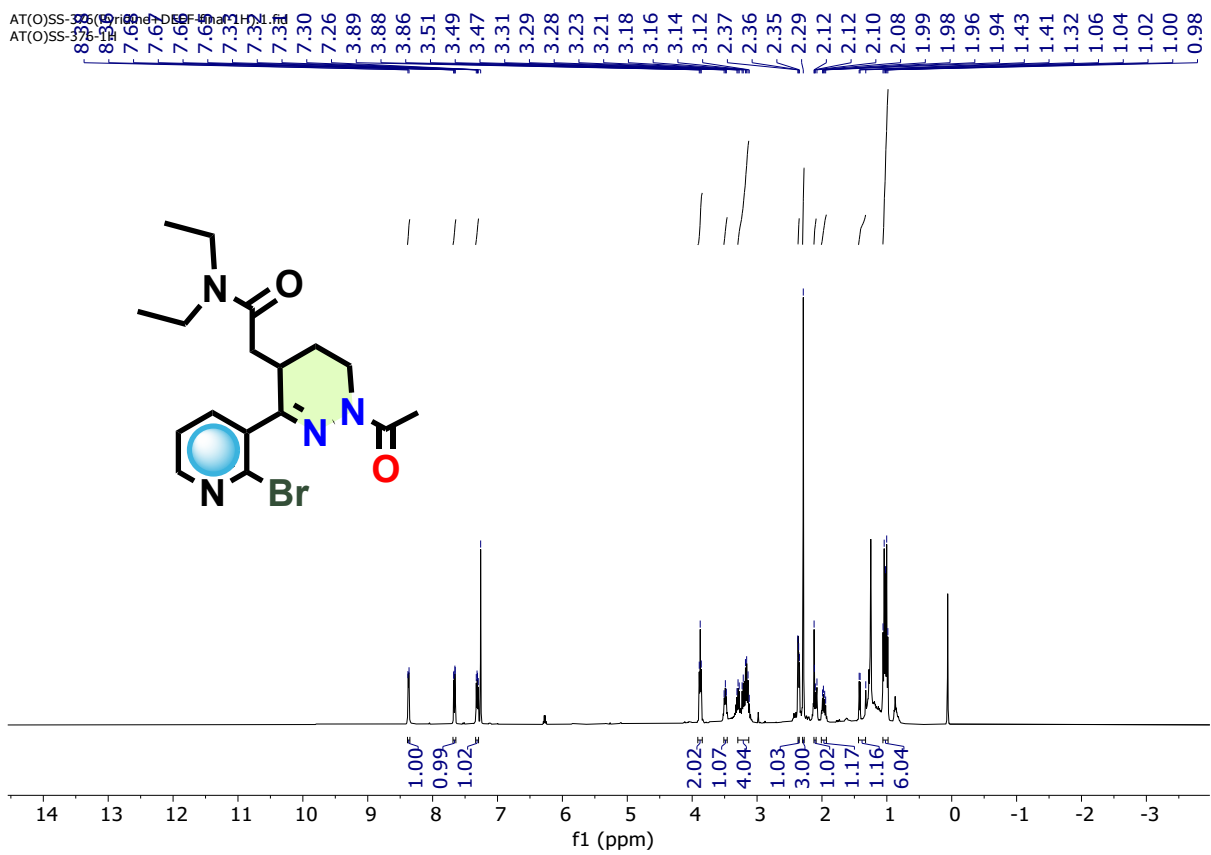

Figure S65.  $^1\text{H}$  (400 MHz) NMR of **2v** compound in  $\text{CDCl}_3$

AT(O)-SS-376(A).1.fid  
AT(O)-SS-376(A)-13C

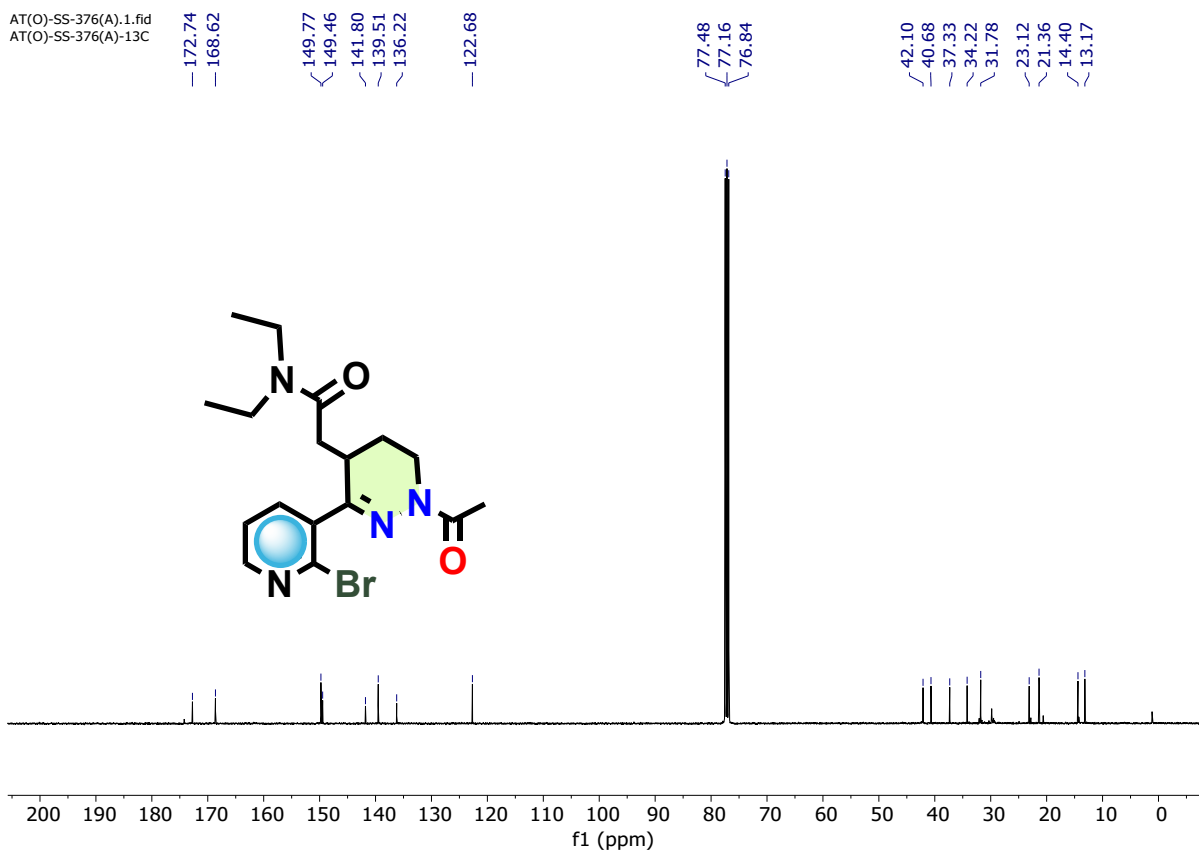

Figure S66.  $^{13}\text{C}$  (100 MHz) NMR of **2v** compound in  $\text{CDCl}_3$

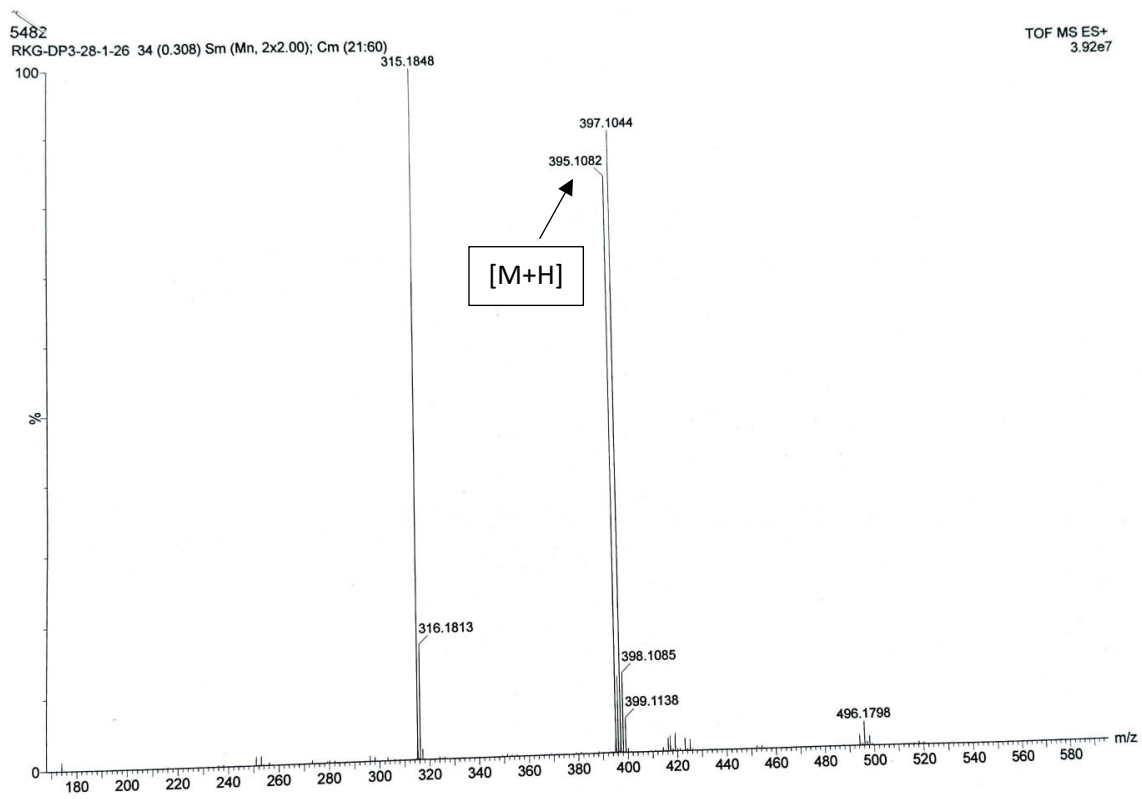

**Figure S67.** HRMS of compound **2v**.

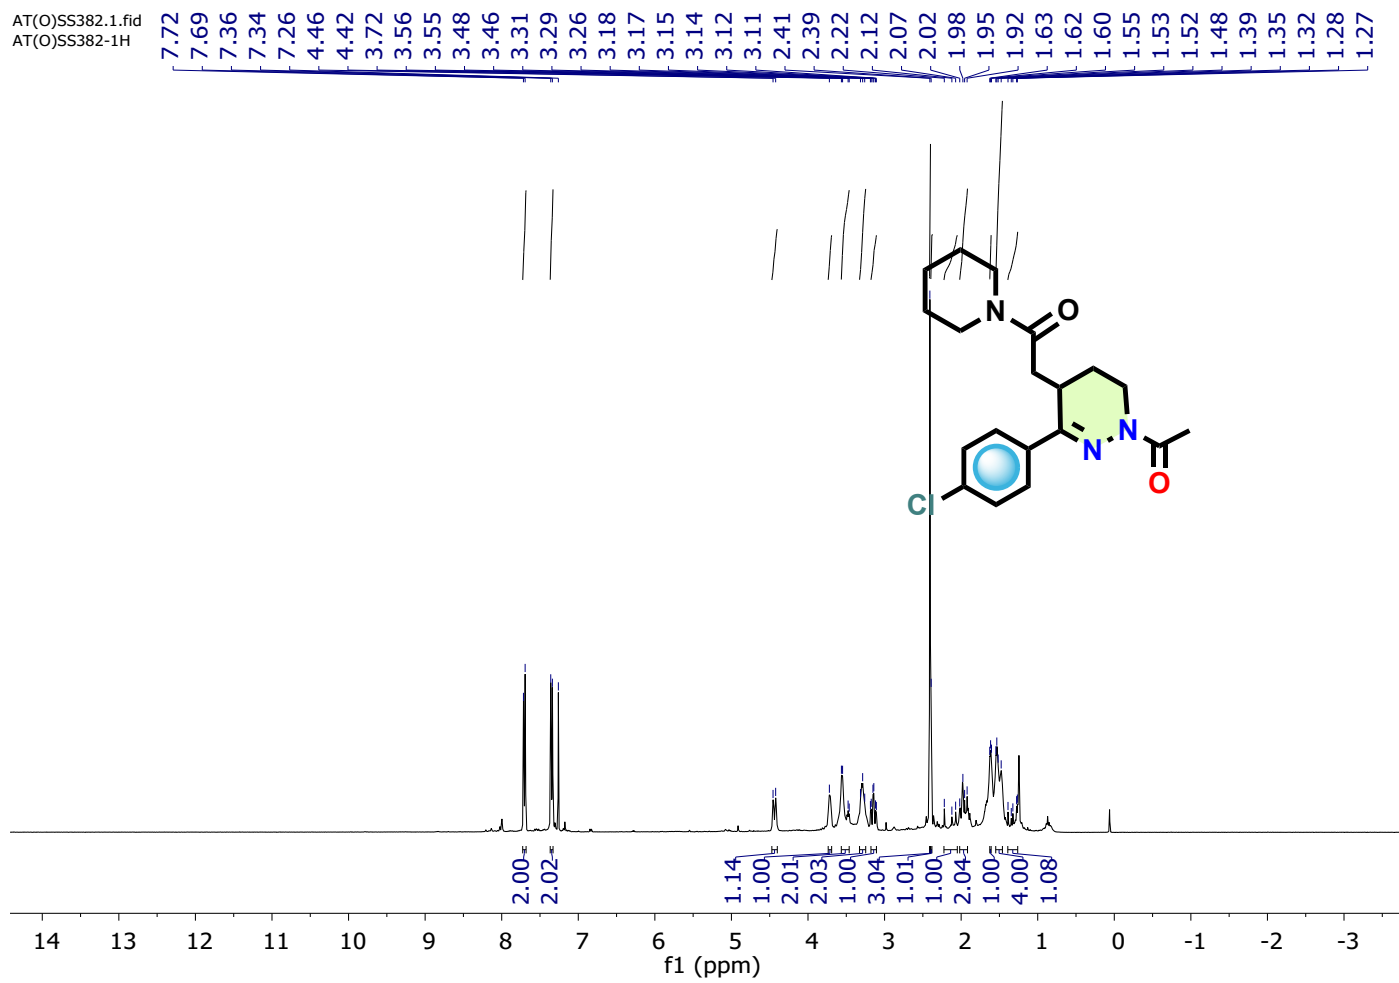

**Figure S68.**  $^1\text{H}$  (400 MHz) NMR of **2w** compound in  $\text{CDCl}_3$

AT(O)SS-382(A).1.fid  
AT(O)SS-382-13C

172.56  
167.97

148.19

135.35  
134.52  
128.97  
127.24

77.47  
77.16  
76.84

46.57  
43.22  
35.17  
34.81  
27.03  
26.59  
25.63  
24.49  
22.11  
21.49

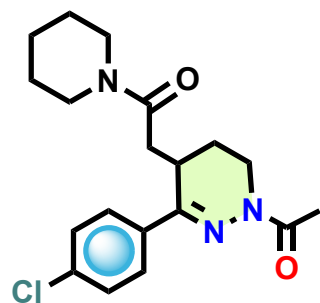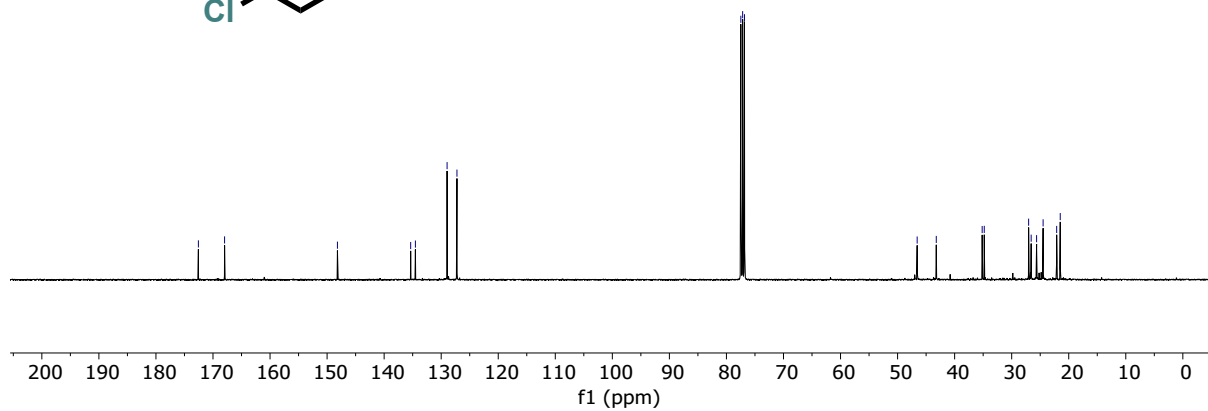

Figure S69. <sup>13</sup>C (100 MHz) NMR of 2w compound in CDCl<sub>3</sub>

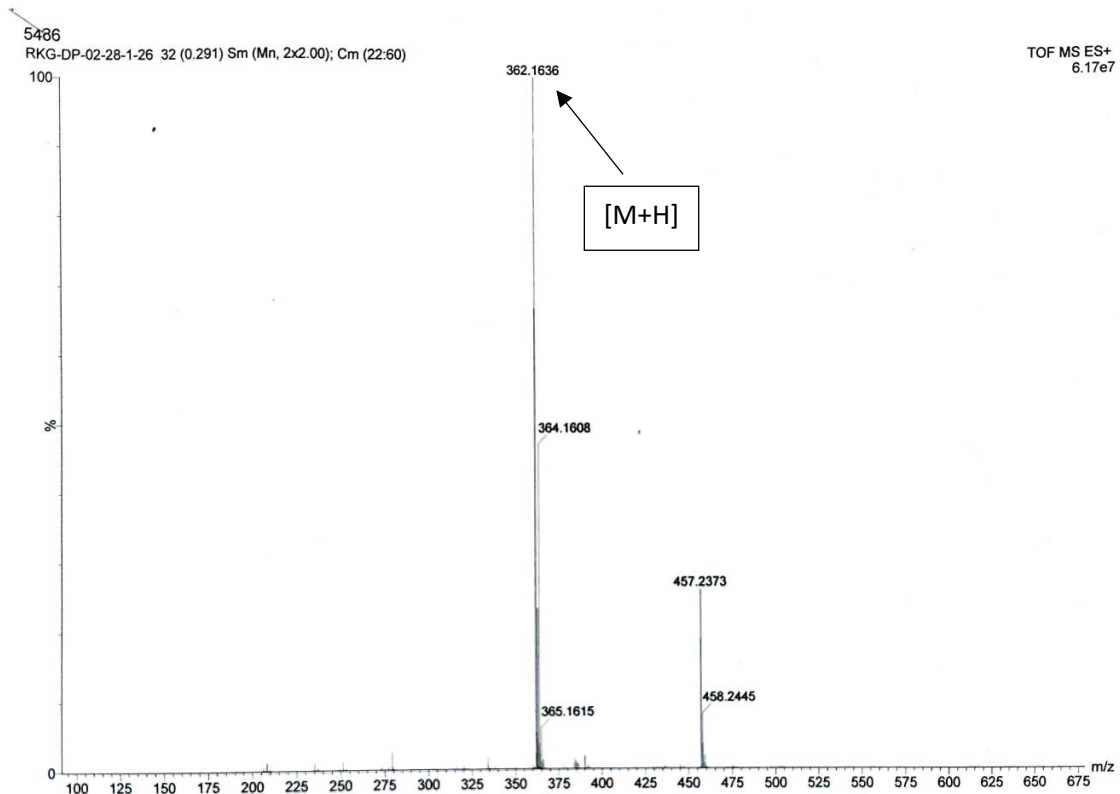

Figure S70. HRMS of compound 2w.

AT(O)SS383.1.fid  
AT(O)SS383-1H

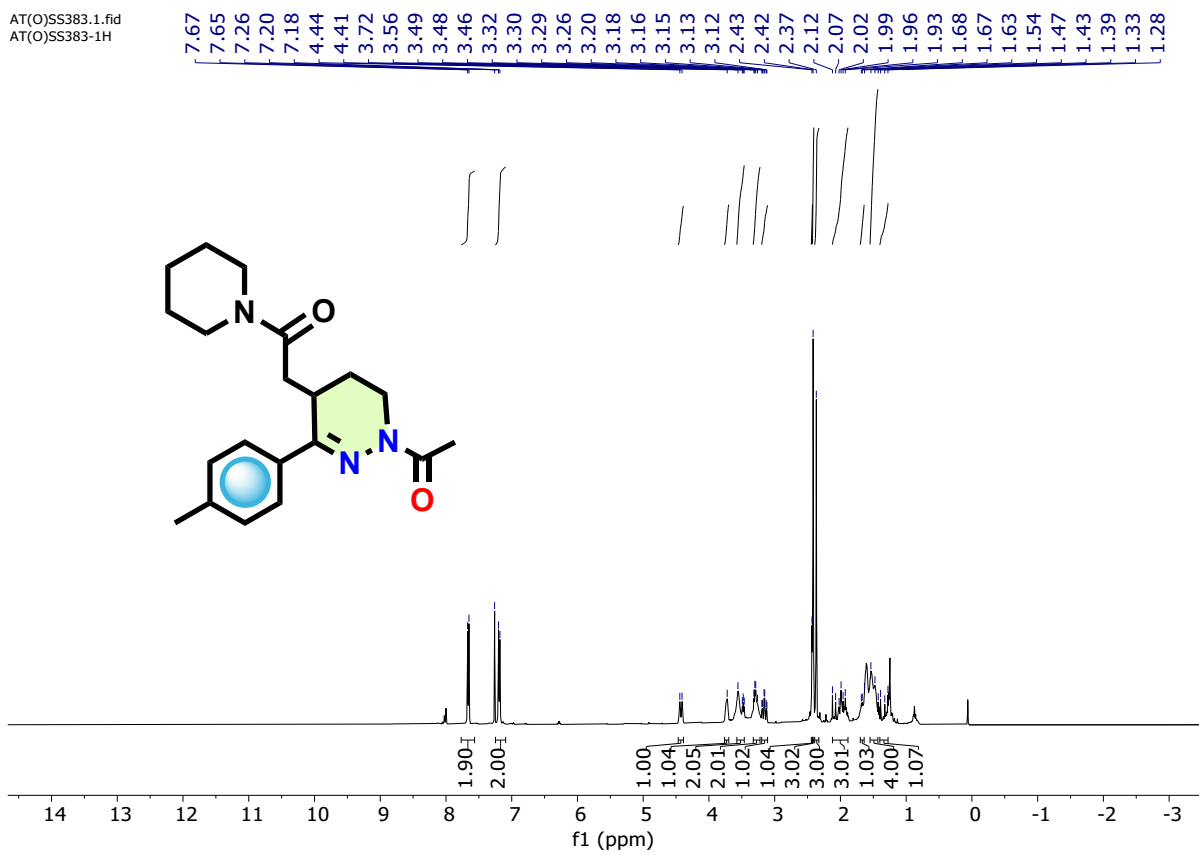

Figure S71. <sup>1</sup>H (400 MHz) NMR of **2x** compound in CDCl<sub>3</sub>

AT(O)SS-383A.1.fid  
AT(O)SS-383A-13C

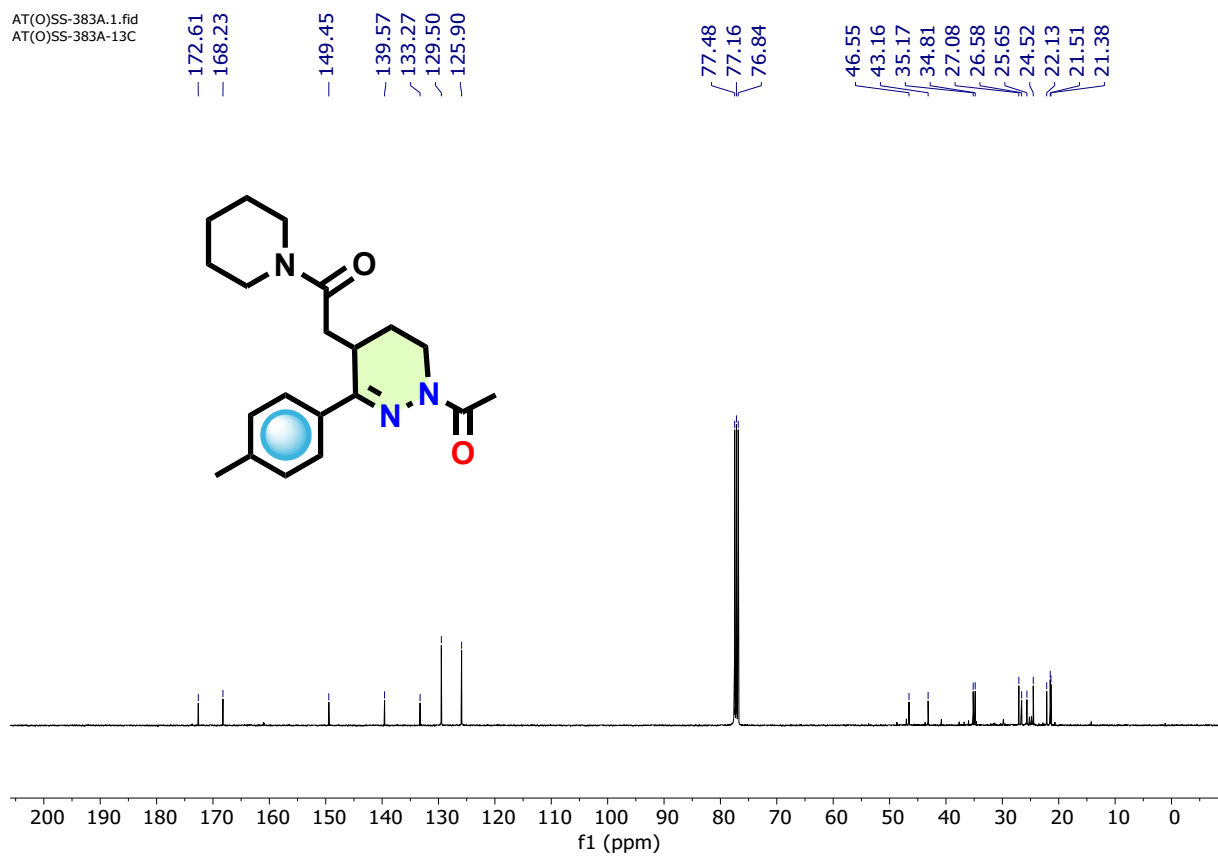

**Figure S72.**  $^{13}\text{C}$  (100 MHz) NMR of **2x** compound in  $\text{CDCl}_3$

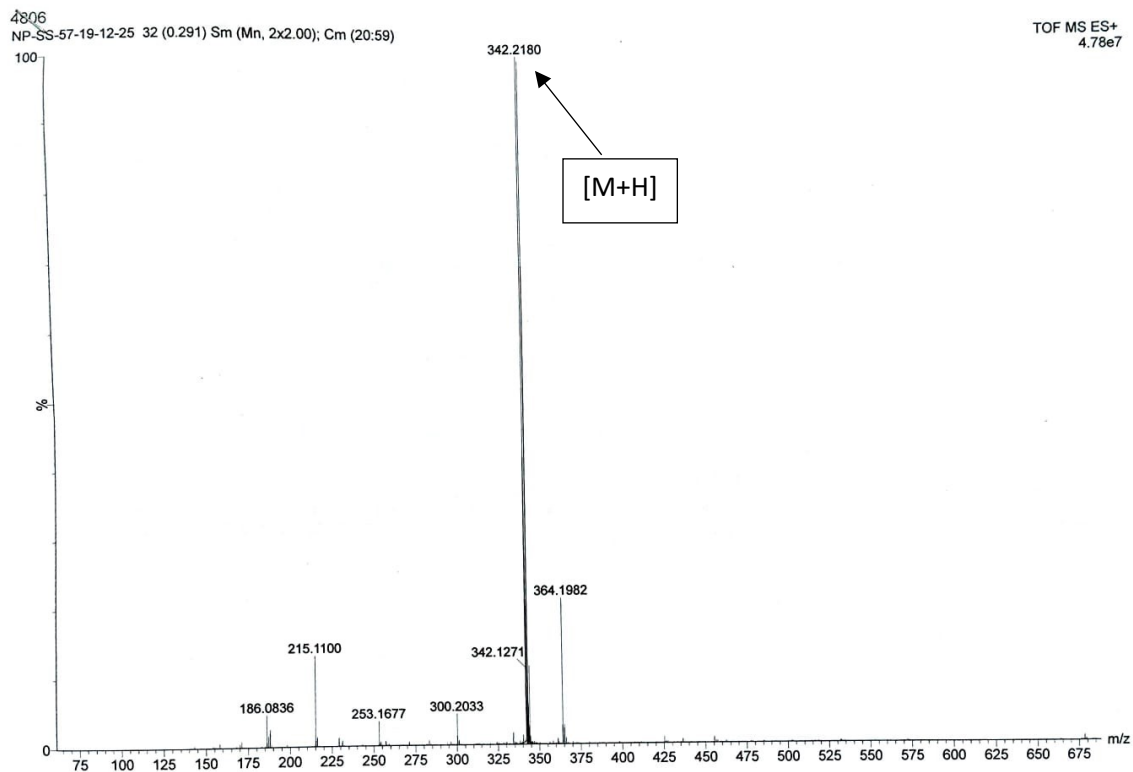

**Figure S73.** HRMS of compound **2x**.

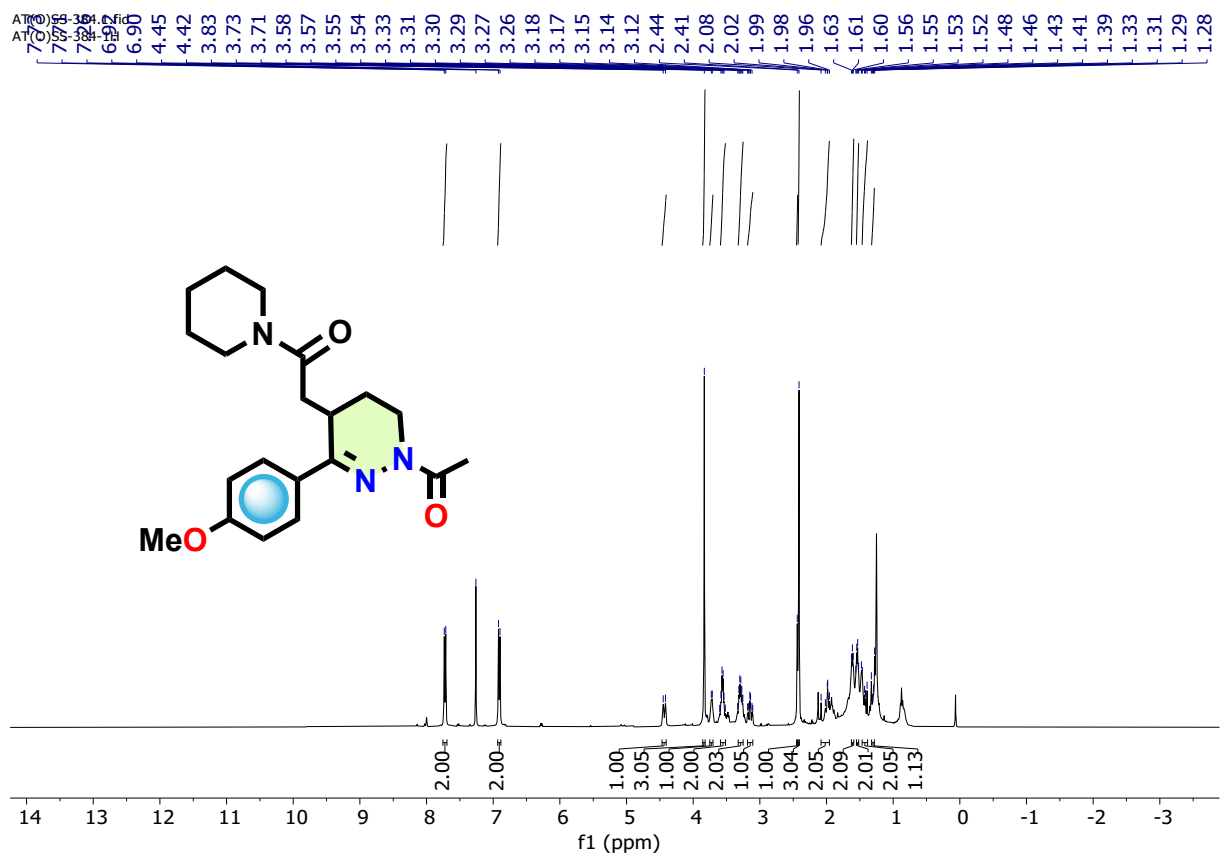

Figure S74. <sup>1</sup>H (400 MHz) NMR of **2y** compound in CDCl<sub>3</sub>

AT(O)SS-384A.1.fid  
AT(O)SS-384A-13C

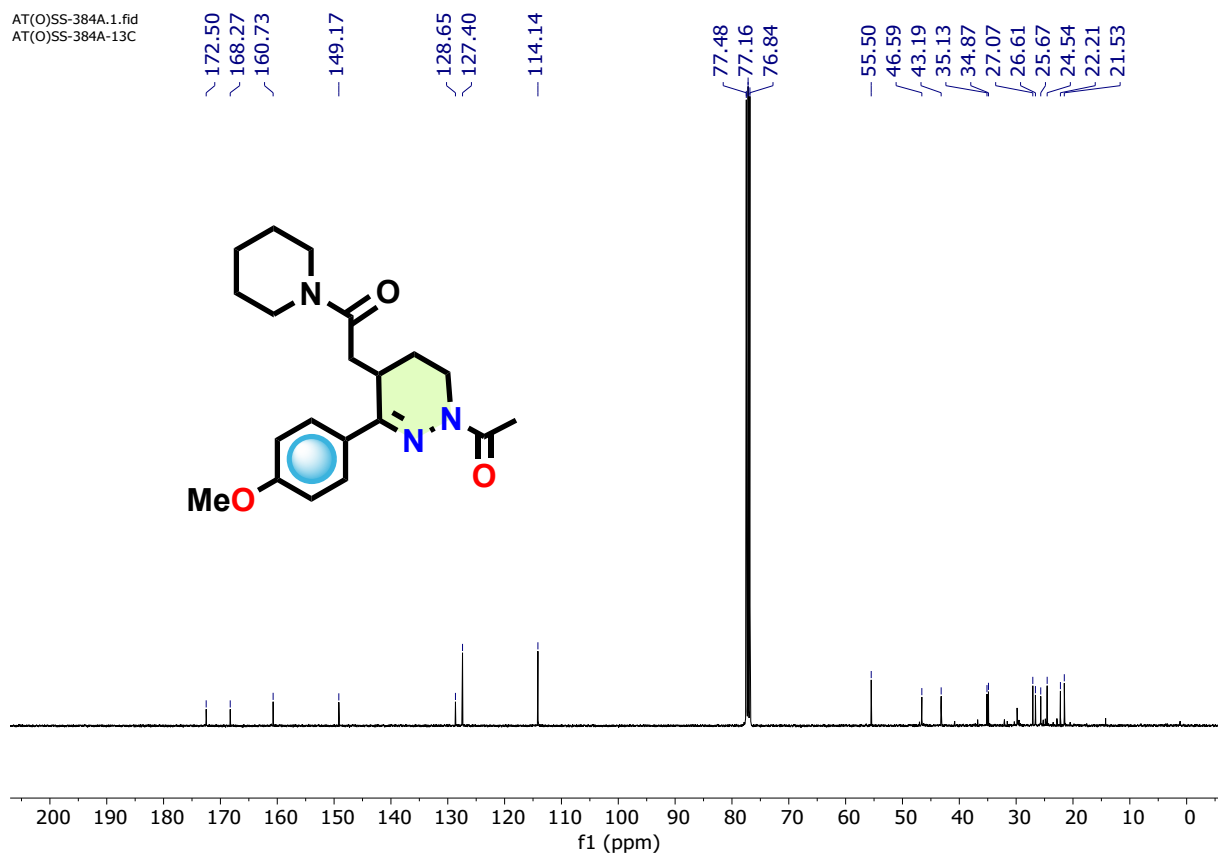

Figure S75. <sup>13</sup>C (100 MHz) NMR of **2y** compound in CDCl<sub>3</sub>

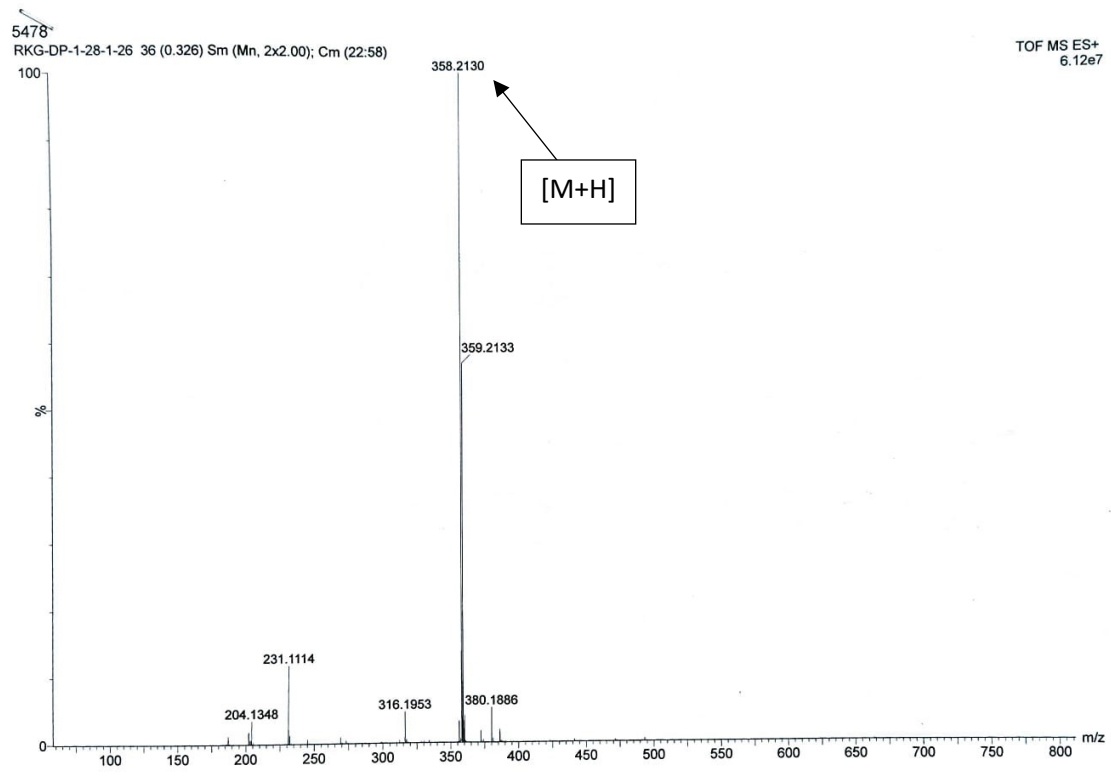

Figure S76. HRMS of compound 2y.

AT(O)-SS-407.1.fid  
AT(O)-SS-407-1H

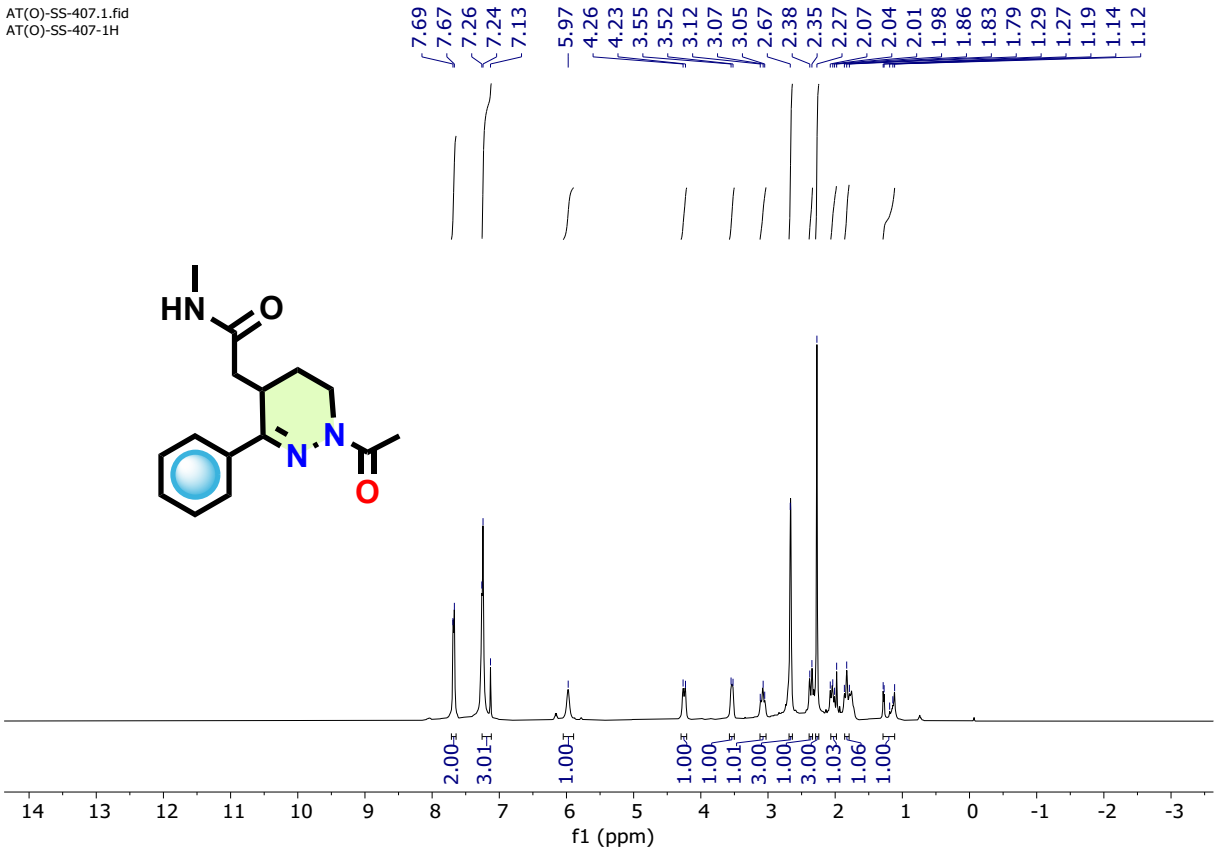

Figure S77. <sup>1</sup>H (400 MHz) NMR of **2z** compound in CDCl<sub>3</sub>

AT(O)SS-407A(Benzaldehyde-N-Methyl-13C)-P2.fid  
AT(O)SS-407A-13C

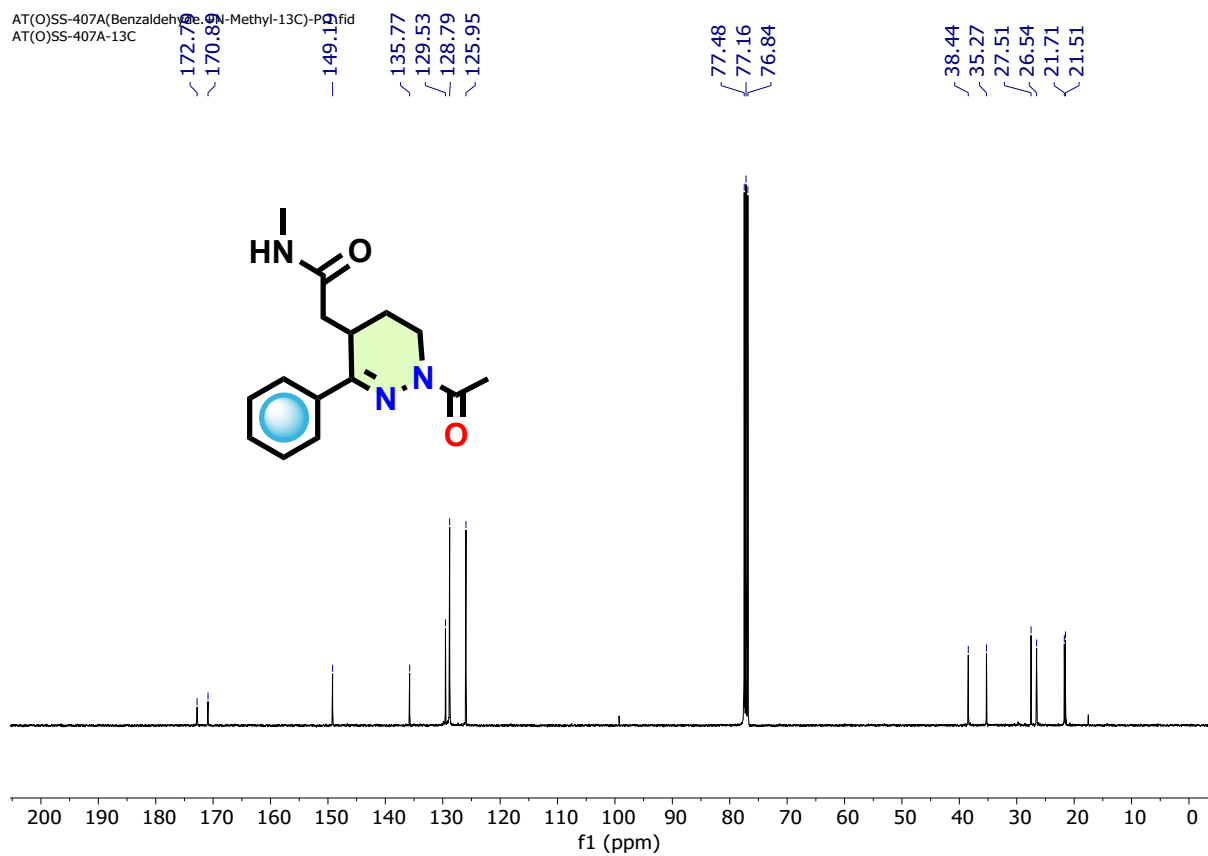

Figure S78. <sup>13</sup>C (100 MHz) NMR of 2z compound in CDCl<sub>3</sub>

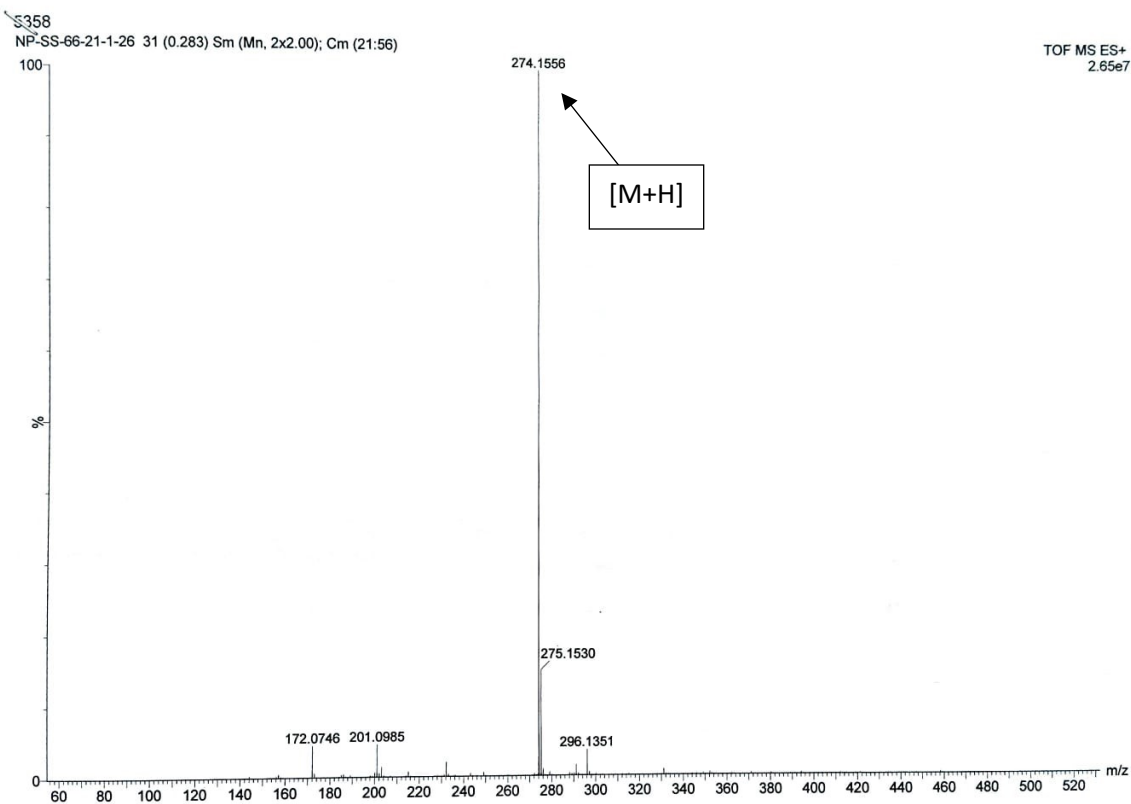

**Figure S79.** HRMS of compound **2z**.

AT(O)SS-386.1.fid  
AT(O)SS-386-1H

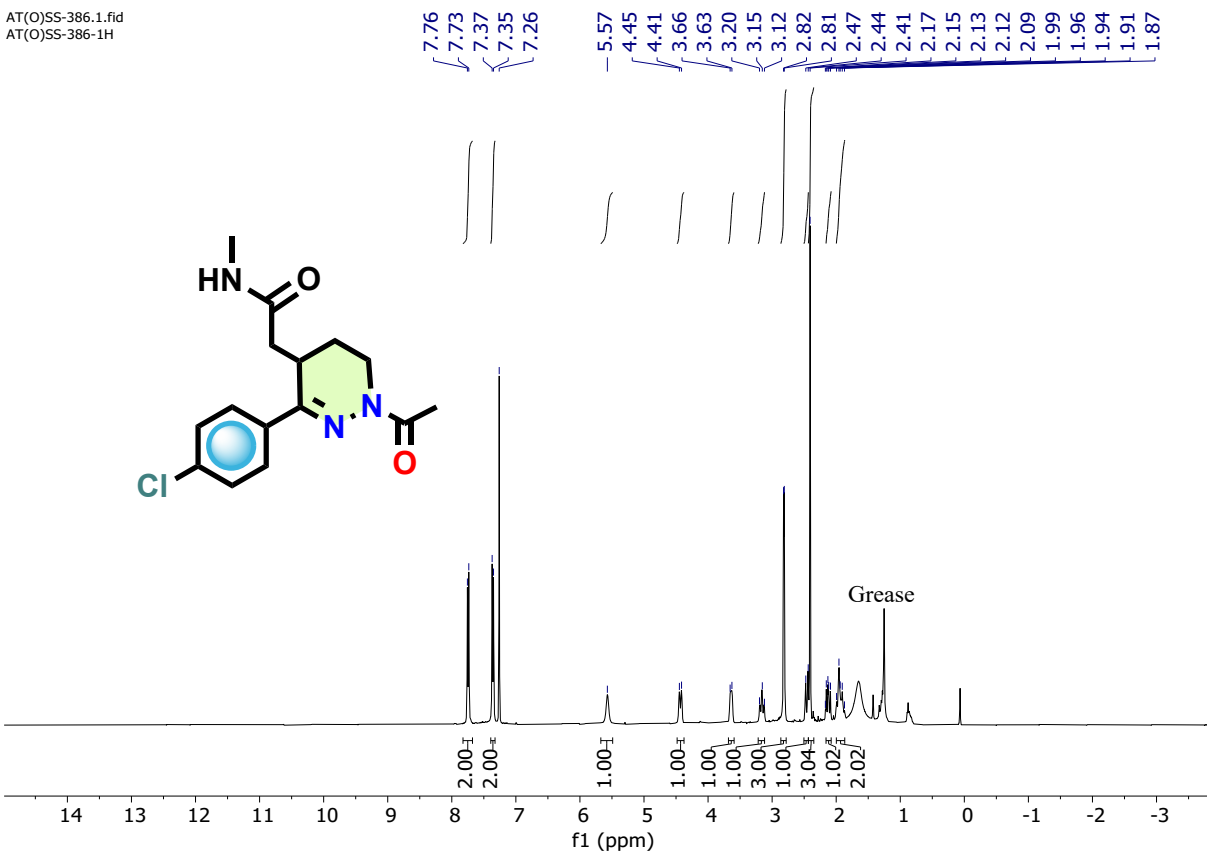

Figure S80.  $^1\text{H}$  (400 MHz) NMR of **2a** compound in  $\text{CDCl}_3$

AT(O)SS-386(A)-1.fid  
AT(O)SS-386(A)-13C

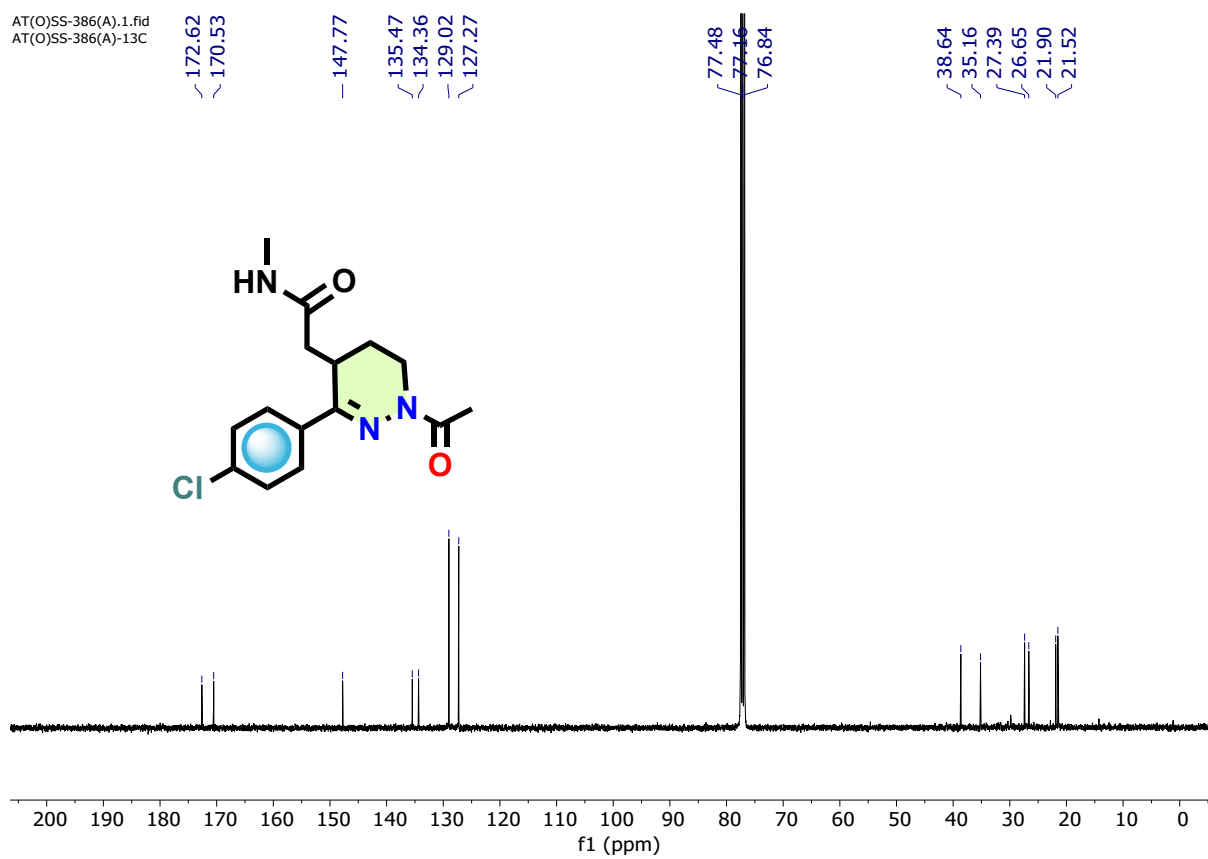

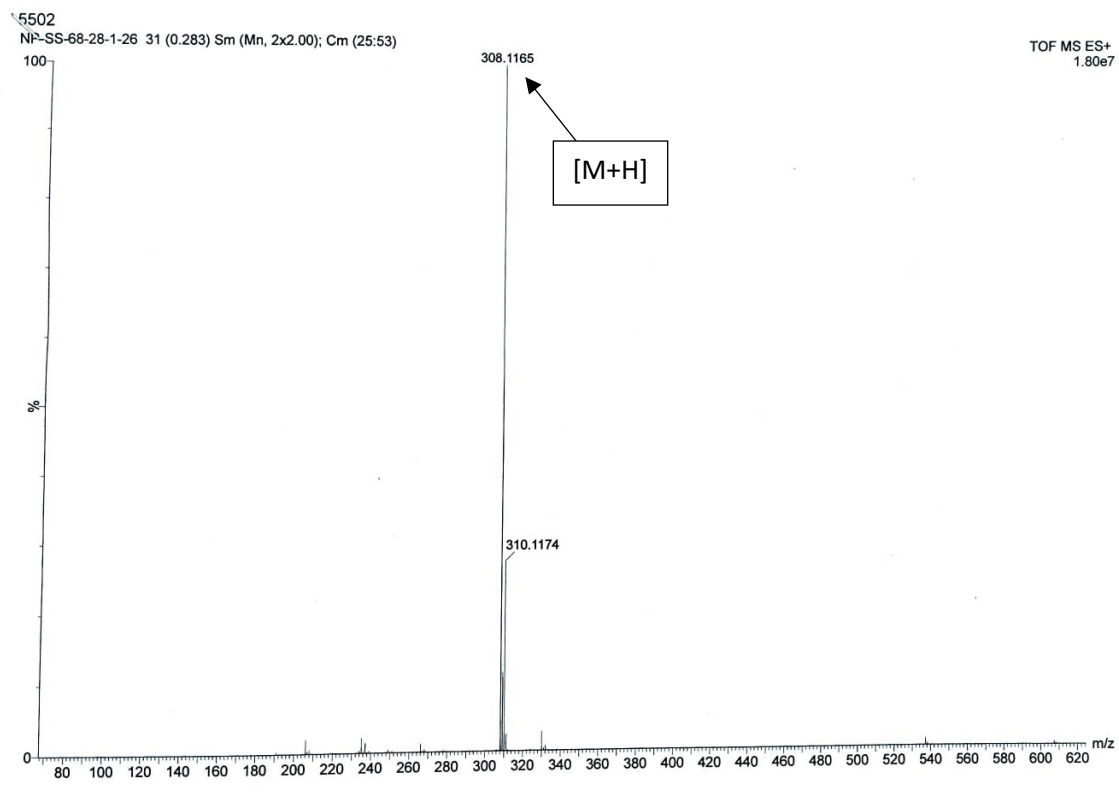

**Figure S82.** HRMS of compound **2za**.

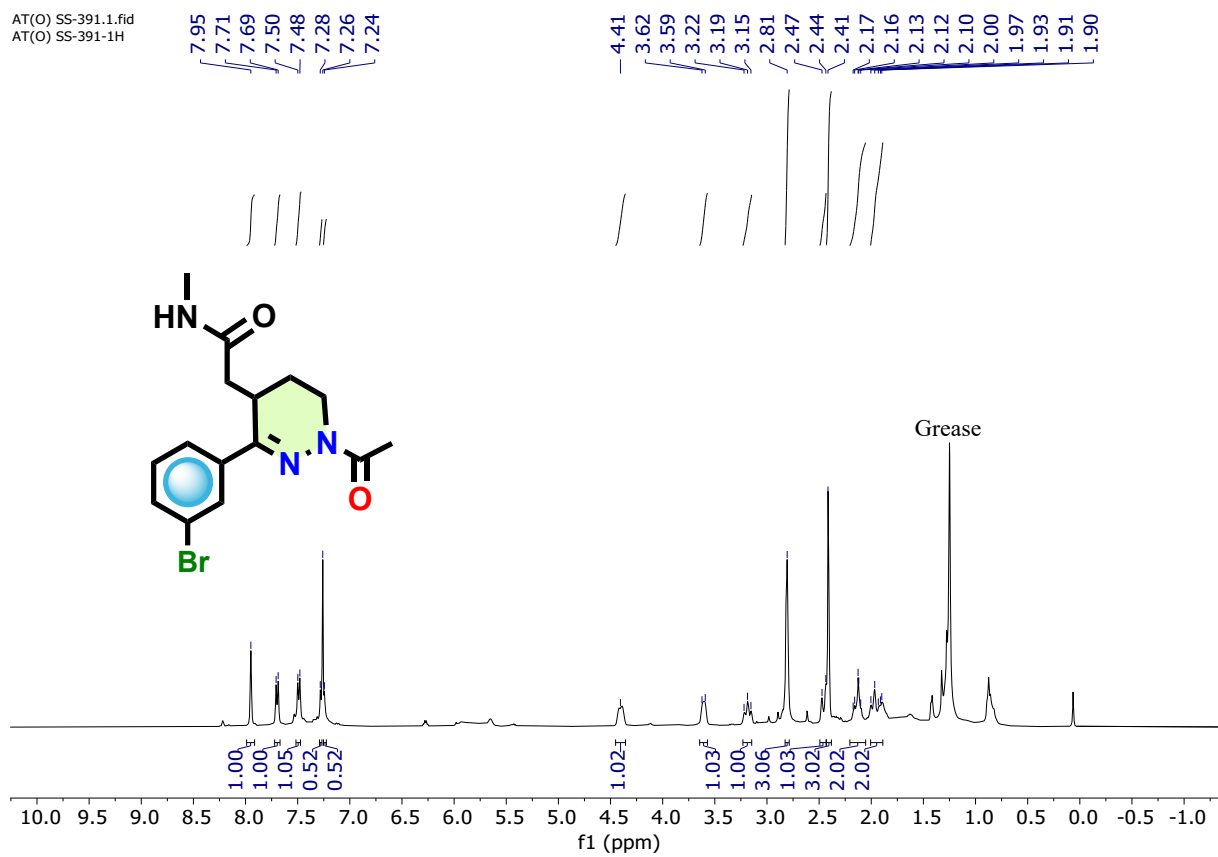

Figure S83. <sup>1</sup>H (400 MHz) NMR of **2b** compound in CDCl<sub>3</sub>

AT(O)-SS-391(A)(3-Br acetyl.+N-Methyl-13C).1.fid  
AT(O)-SS-391(A)- 13C

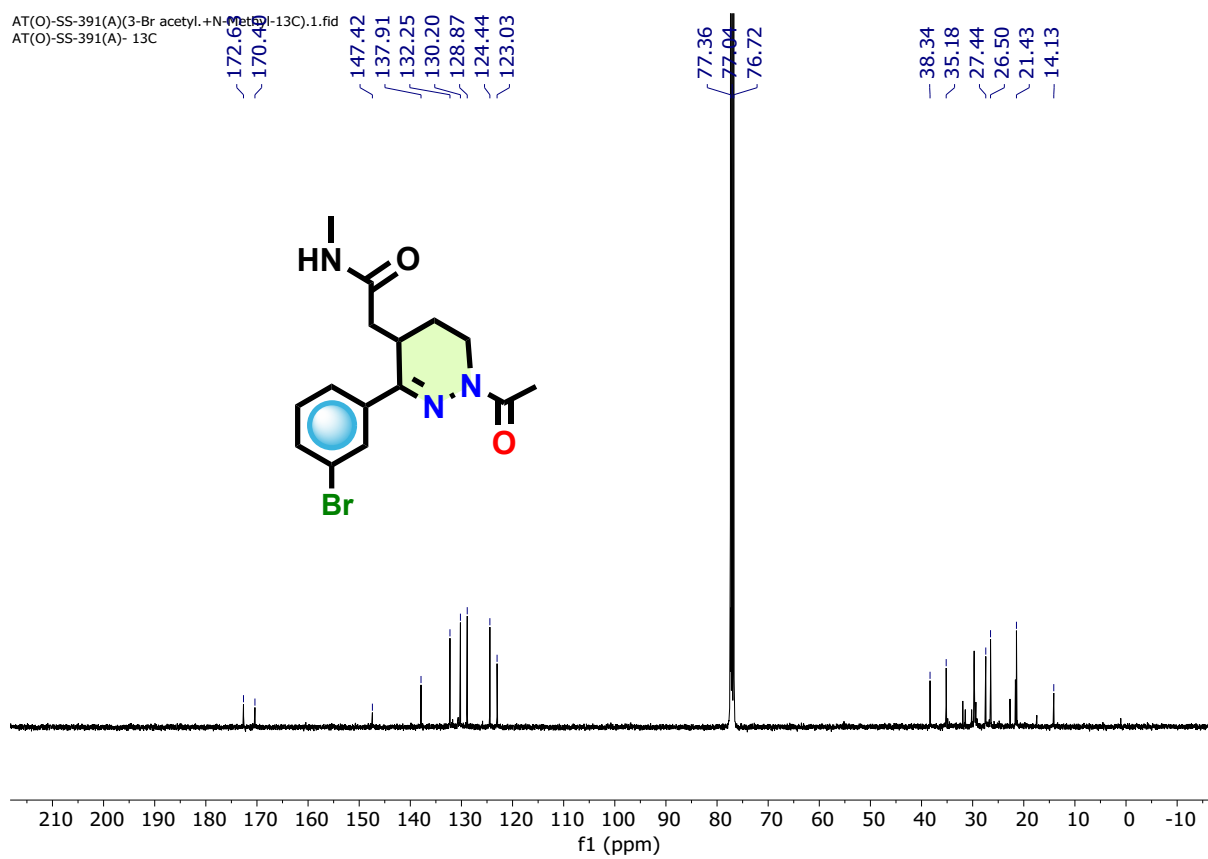

**Figure S84.** <sup>13</sup>C (100 MHz) NMR of **2zb** compound in CDCl<sub>3</sub>

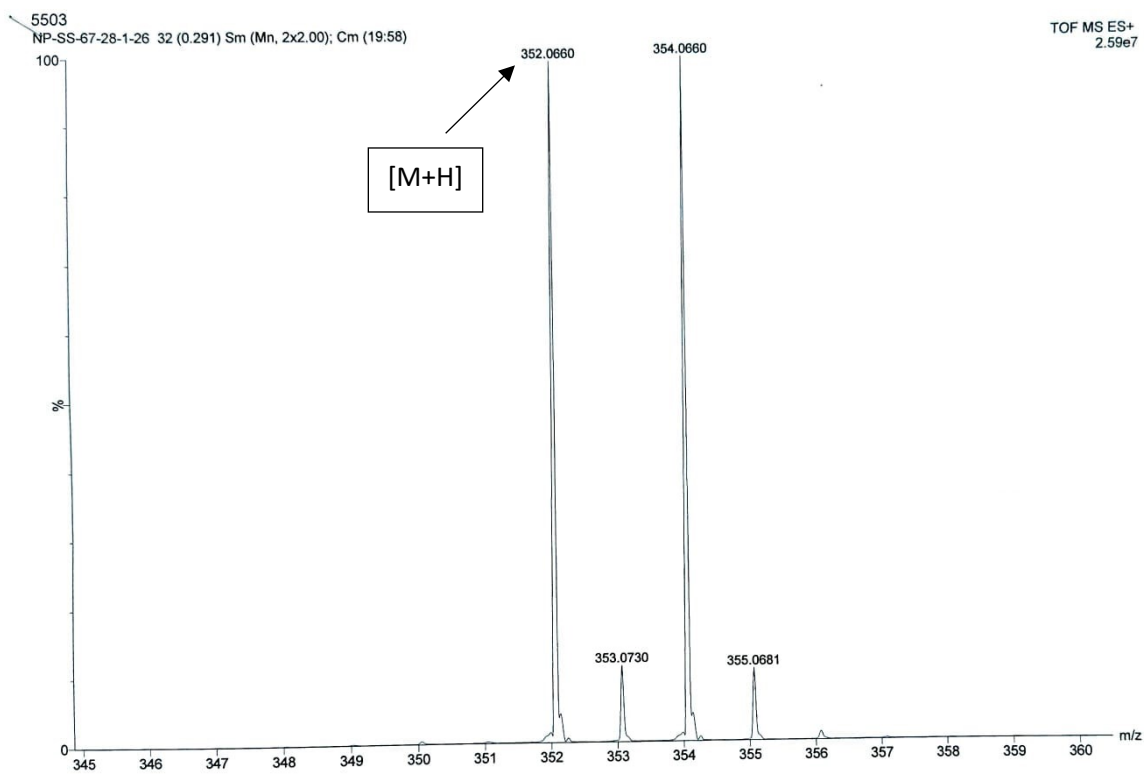

**Figure S85.** HRMS of compound **2zb**.

AT(O)-SS-409.1.fid  
AT(O)-SS-409-1H

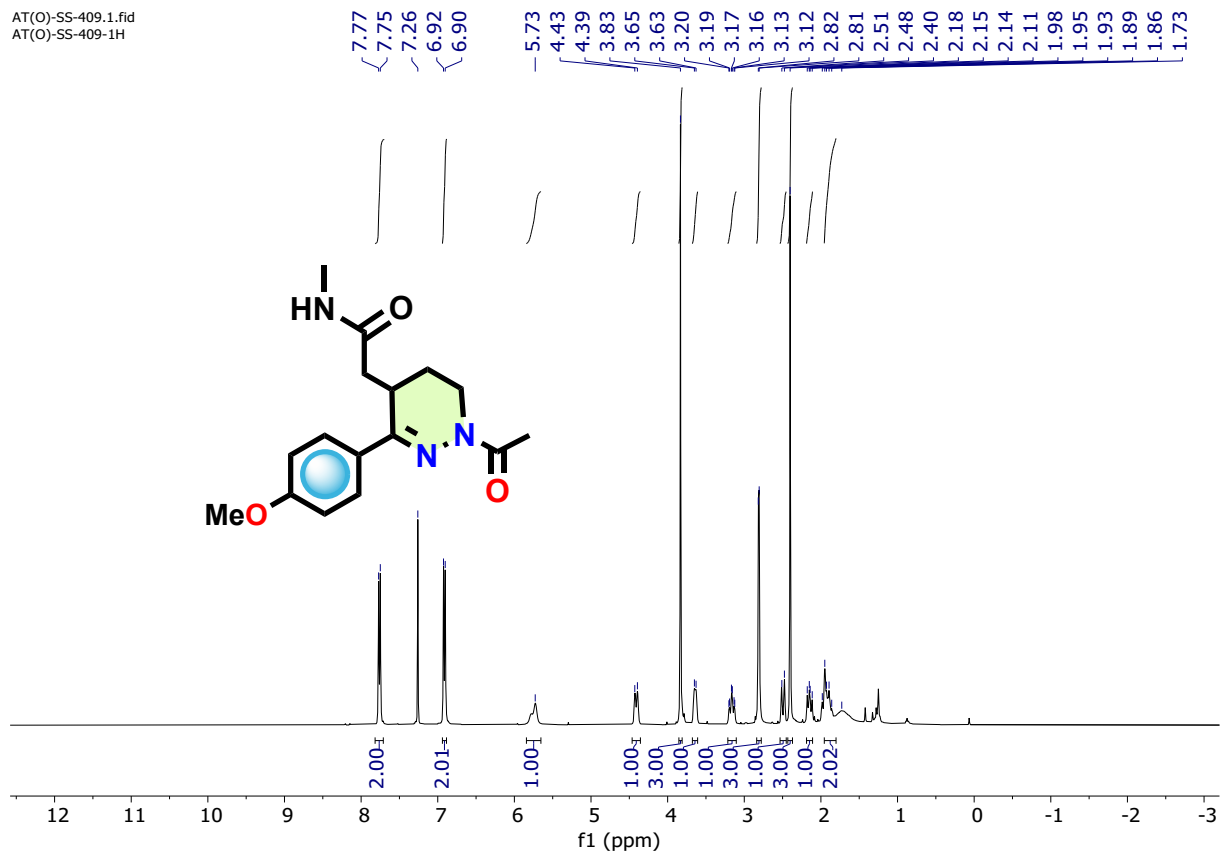

Figure S86. <sup>1</sup>H (400 MHz) NMR of **2zc** compound in CDCl<sub>3</sub>

AT(O)SS-409A.1.fid  
AT(O)SS-409A-13C

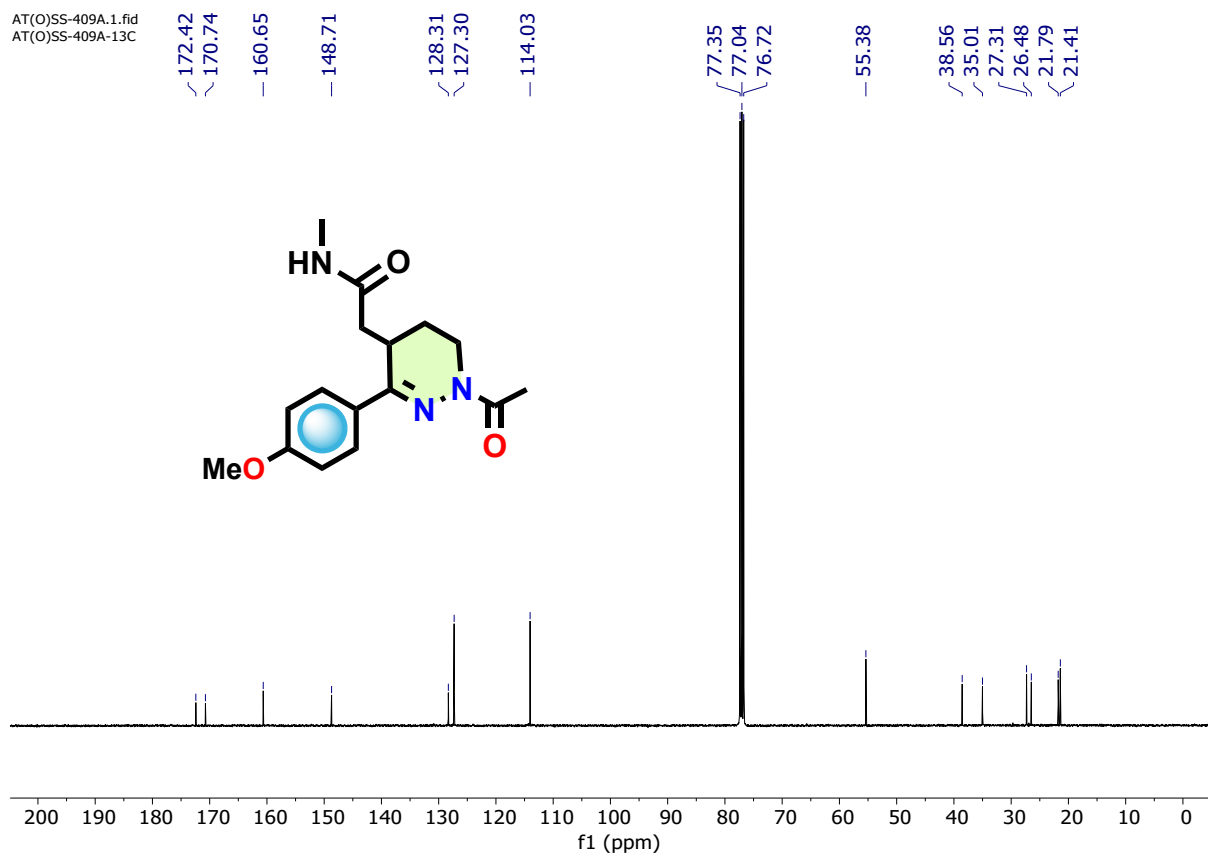

Figure S87.  $^{13}\text{C}$  (100 MHz) NMR of **2zc** compound in  $\text{CDCl}_3$

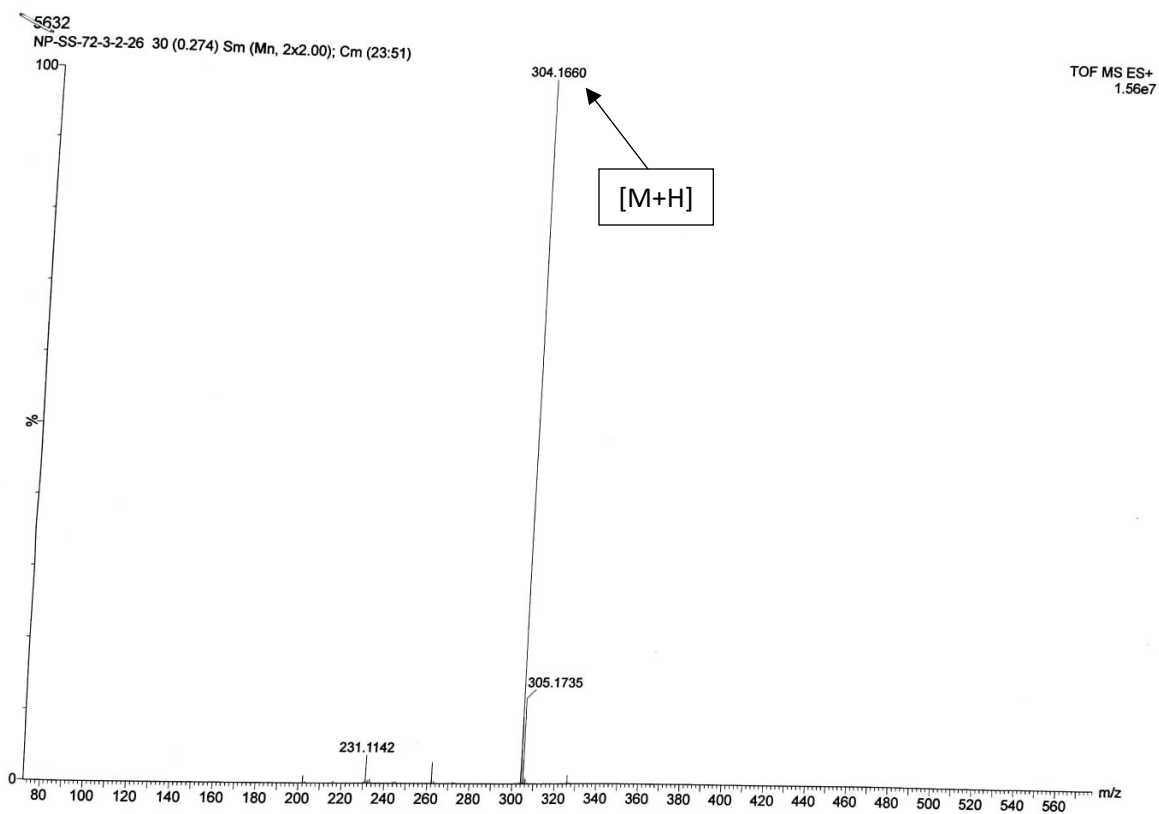

Figure S88. HRMS of **2zc** compound.

AT(O)-SS-390 (4-Me acetyl.+N-Methyl-1H).1.fid  
AT(O)-SS-390-1H

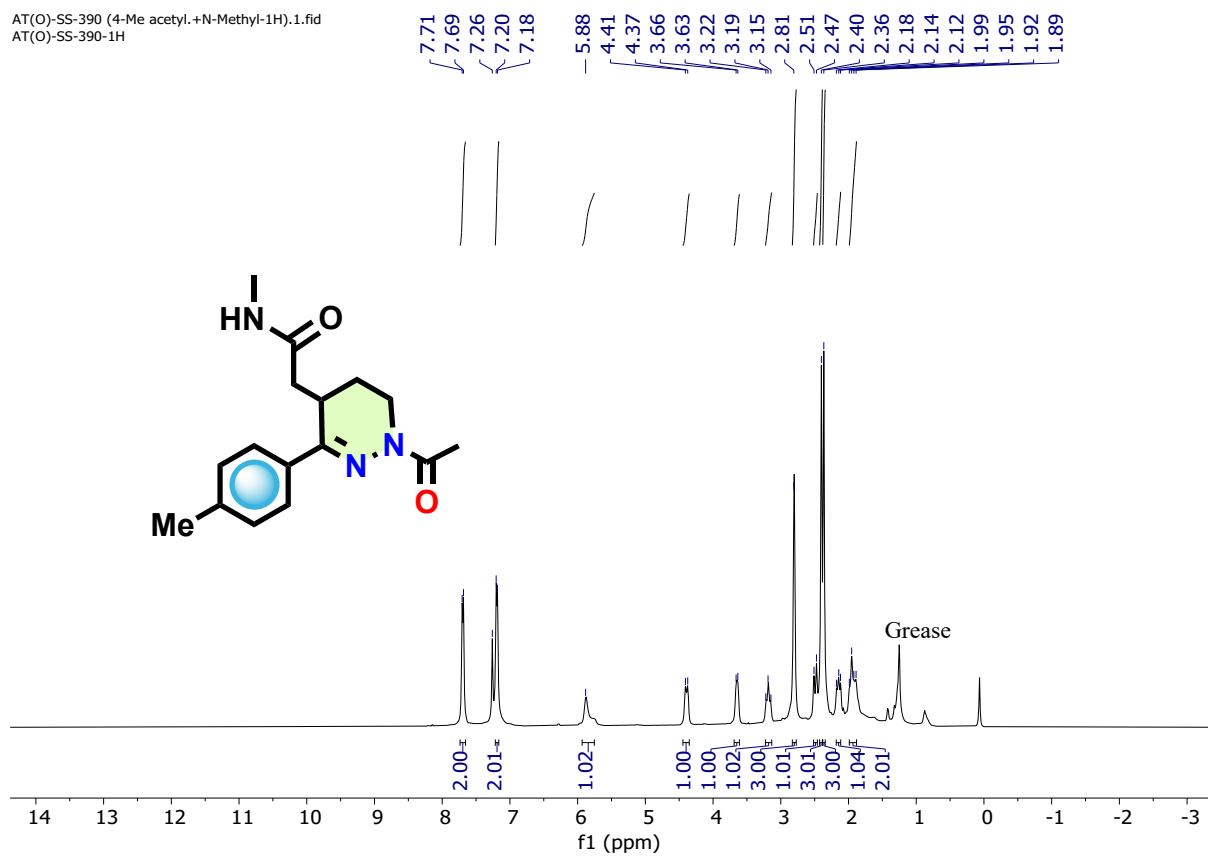

Figure S89.  $^1\text{H}$  (400 MHz) NMR of **2zd** compound in  $\text{CDCl}_3$

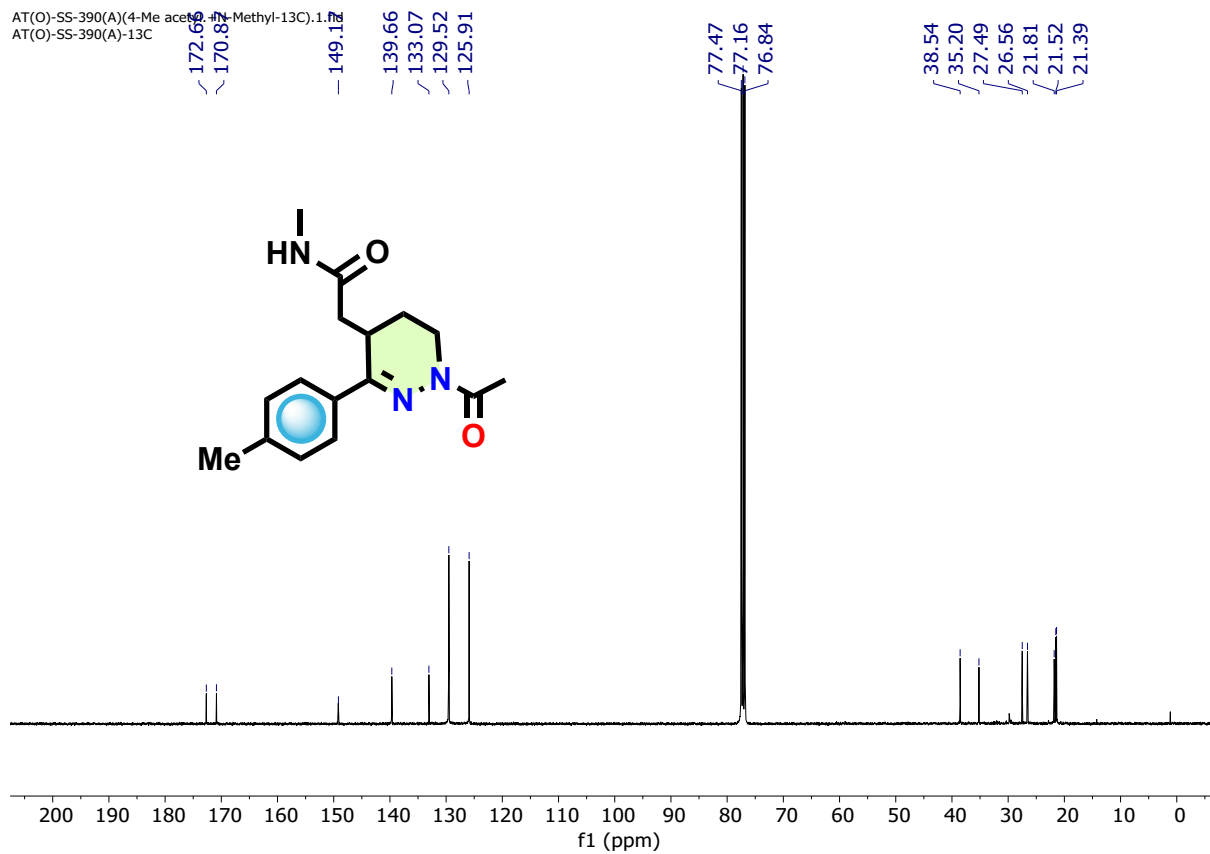

**Figure S90.**  $^{13}\text{C}$  (100 MHz) NMR of **2zd** compound in  $\text{CDCl}_3$

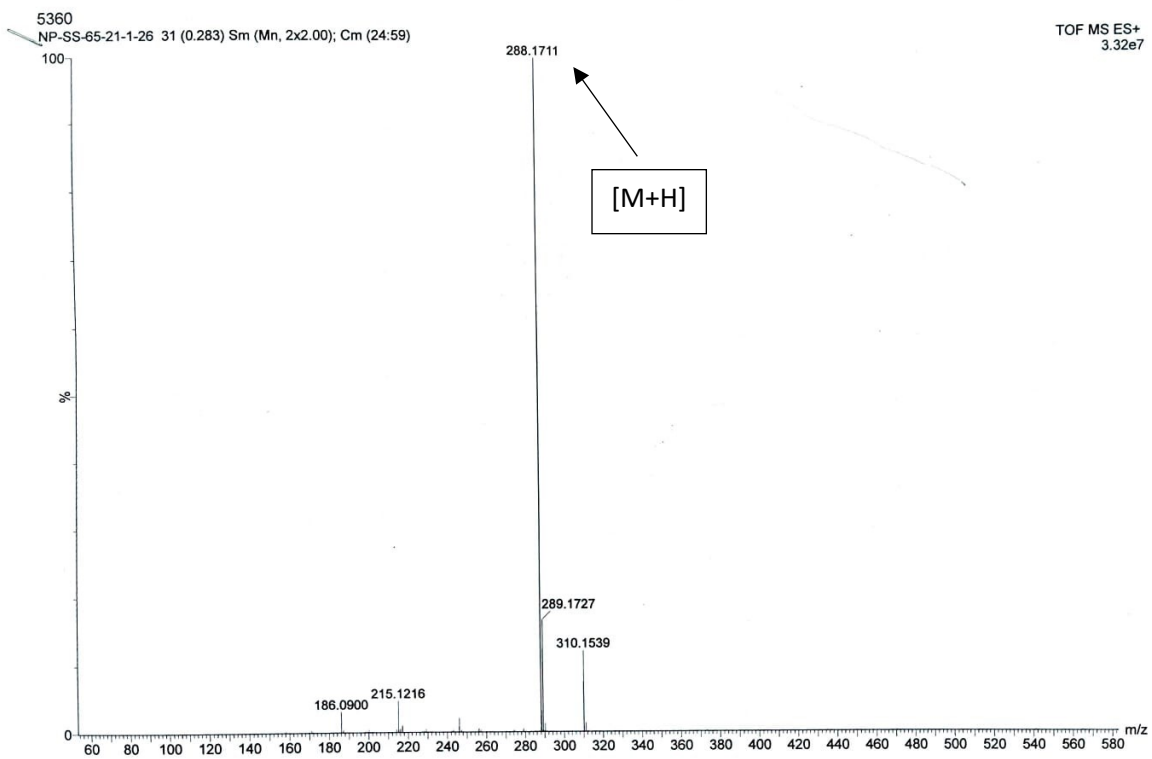

**Figure S91.** HRMS of compound **2zd**.

AT(O)-SS-411(A).1.fid  
AT(O)-SS-411(A)-1H

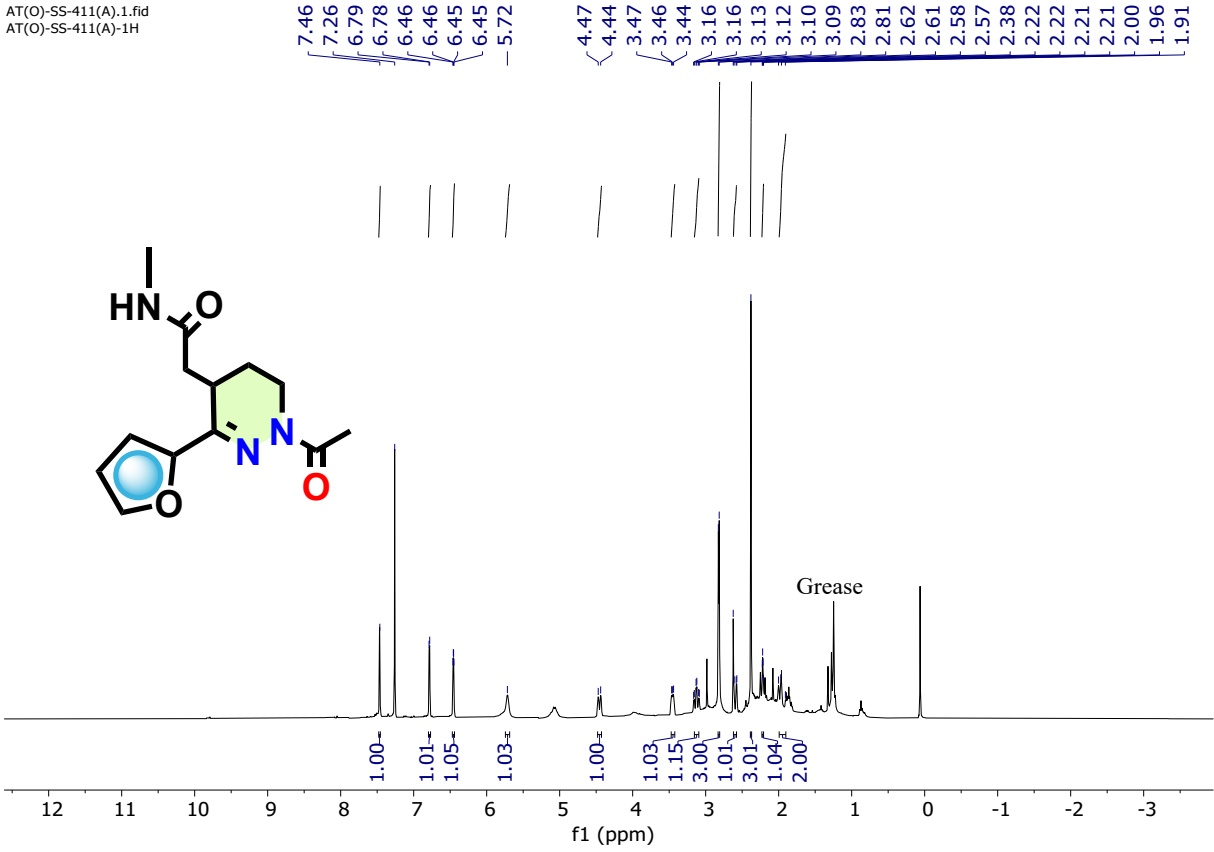

Figure S92. <sup>1</sup>H (400 MHz) NMR of **2ze** compound in CDCl<sub>3</sub>.

AT(O)-SS-411(A).2.fid  
AT(O)-SS-411(A)-13C

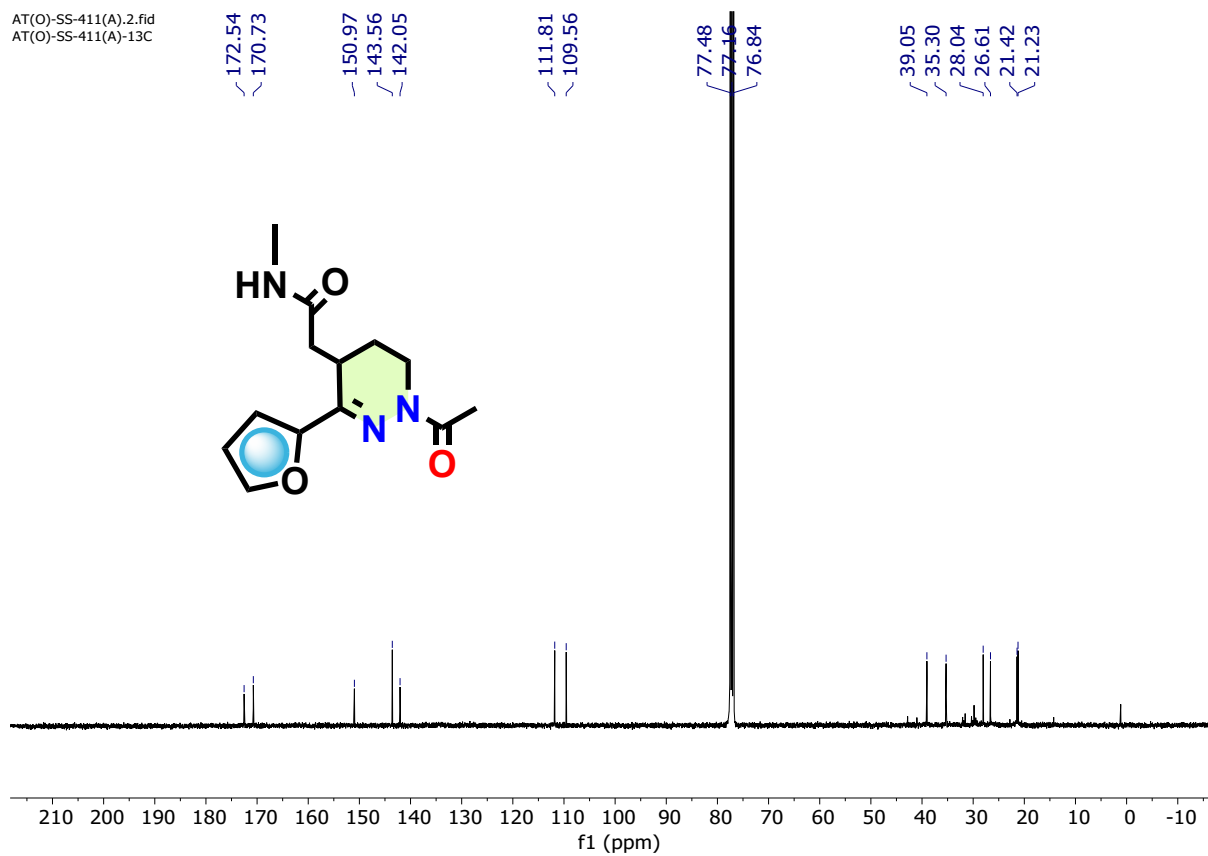

Figure S93.  $^{13}\text{C}$  (100 MHz) NMR of **2ze** compound in  $\text{CDCl}_3$

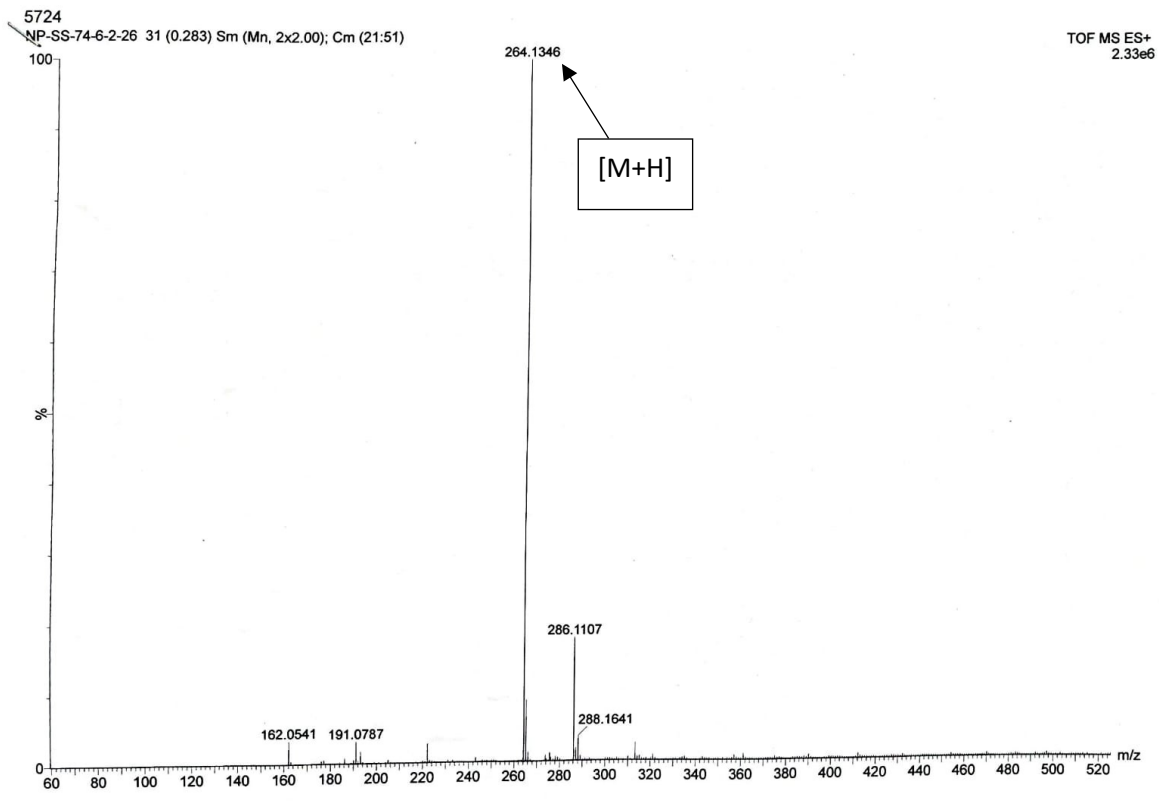

**Figure S94.** HRMS of compound **2ze**.

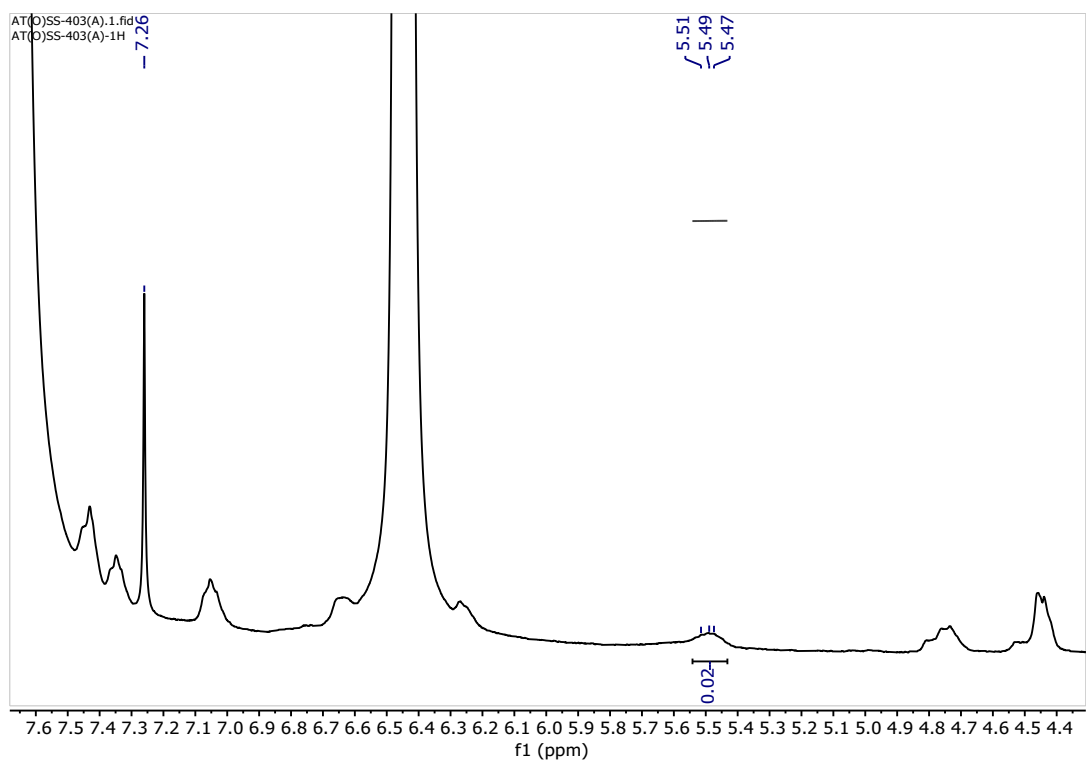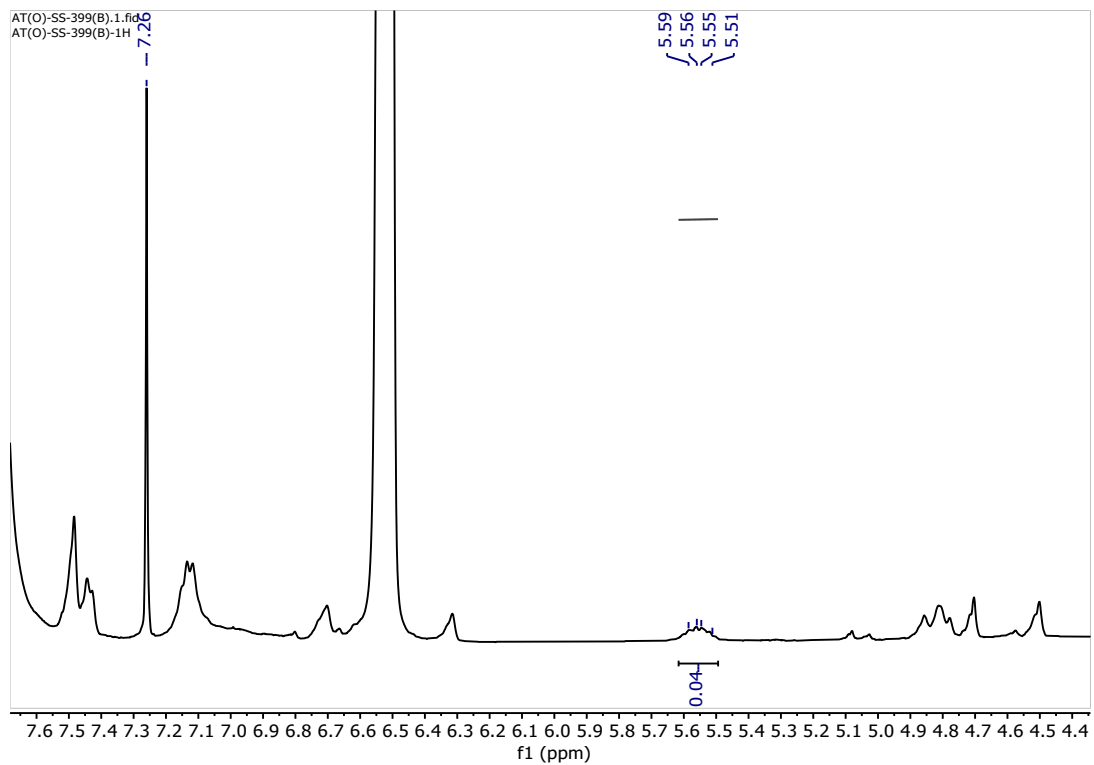

**Figure S95.**  $^1\text{H}$  NMR for Hammett analysis between **2b** and **2a**.

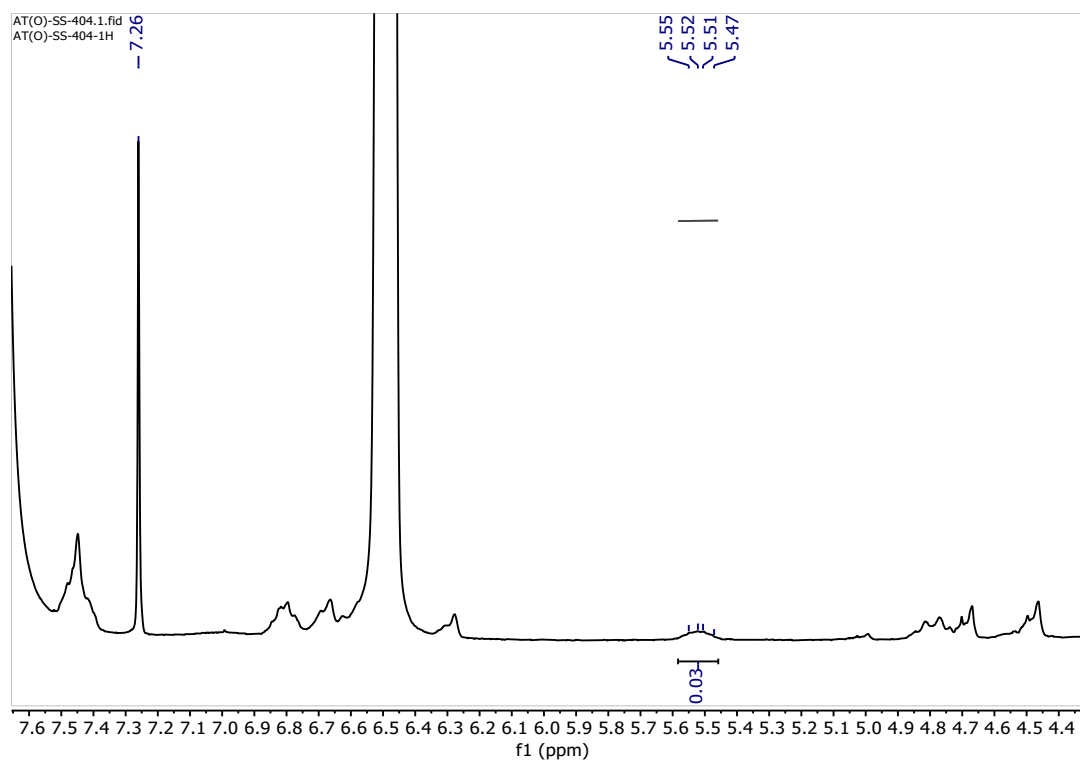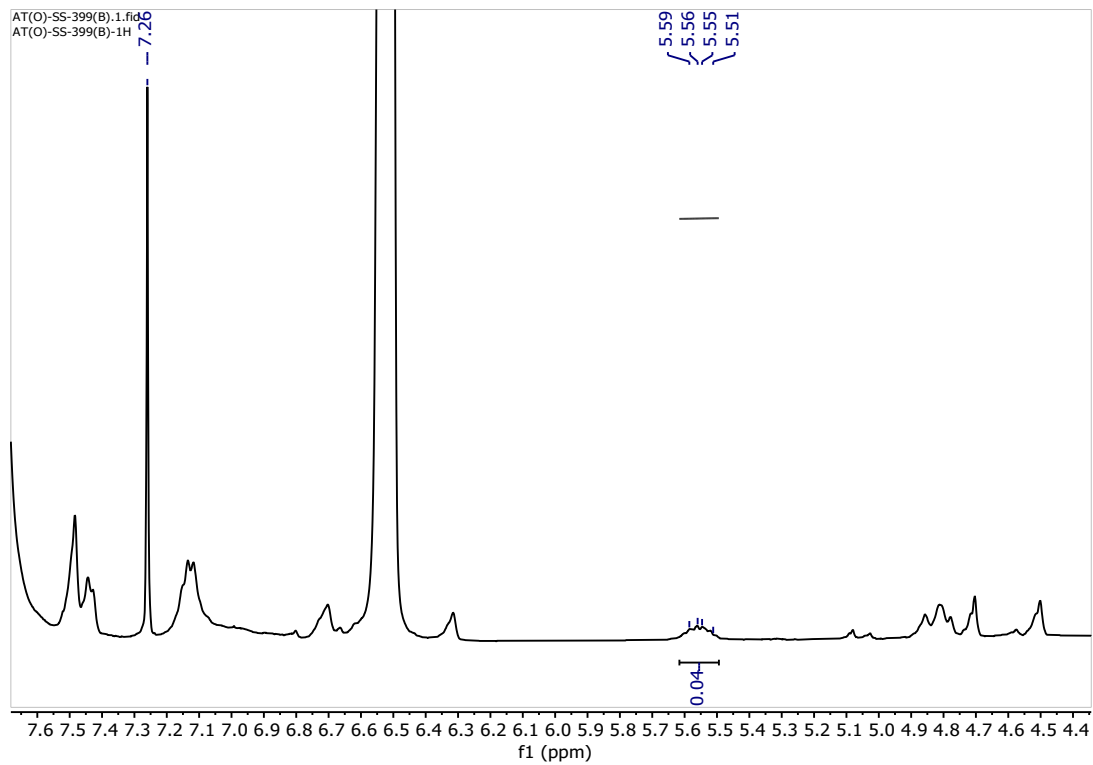

**Figure S96.**  $^1\text{H}$  NMR for Hammett analysis between **2c** and **2a**.

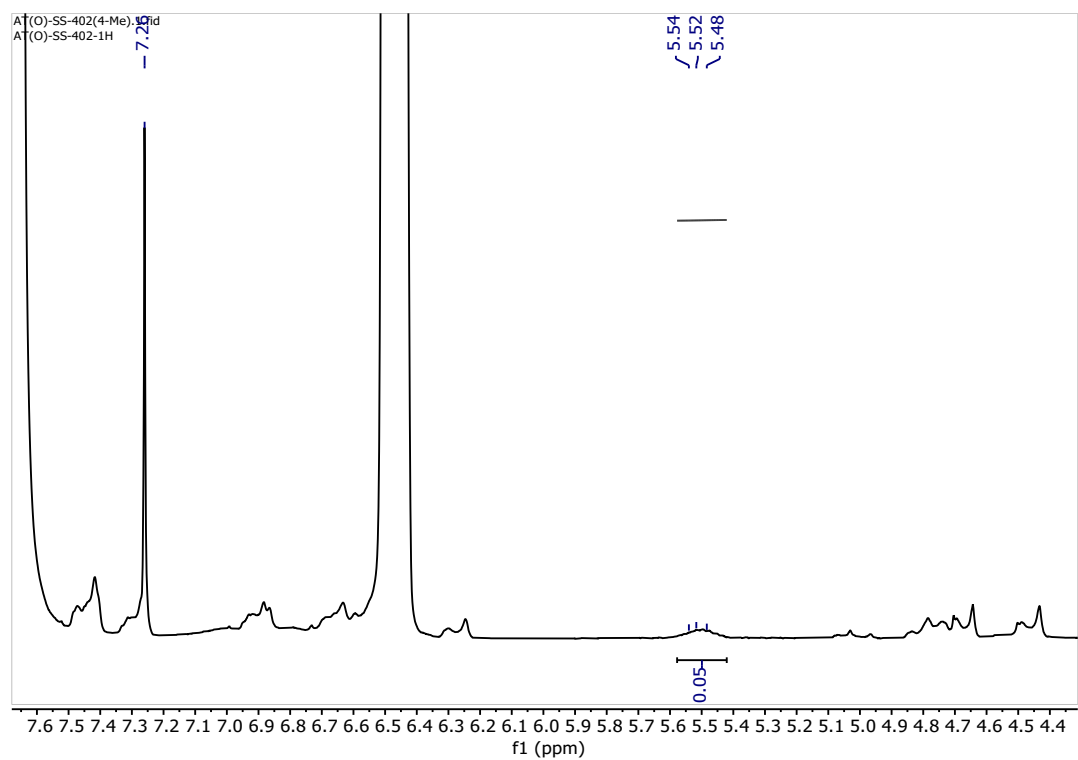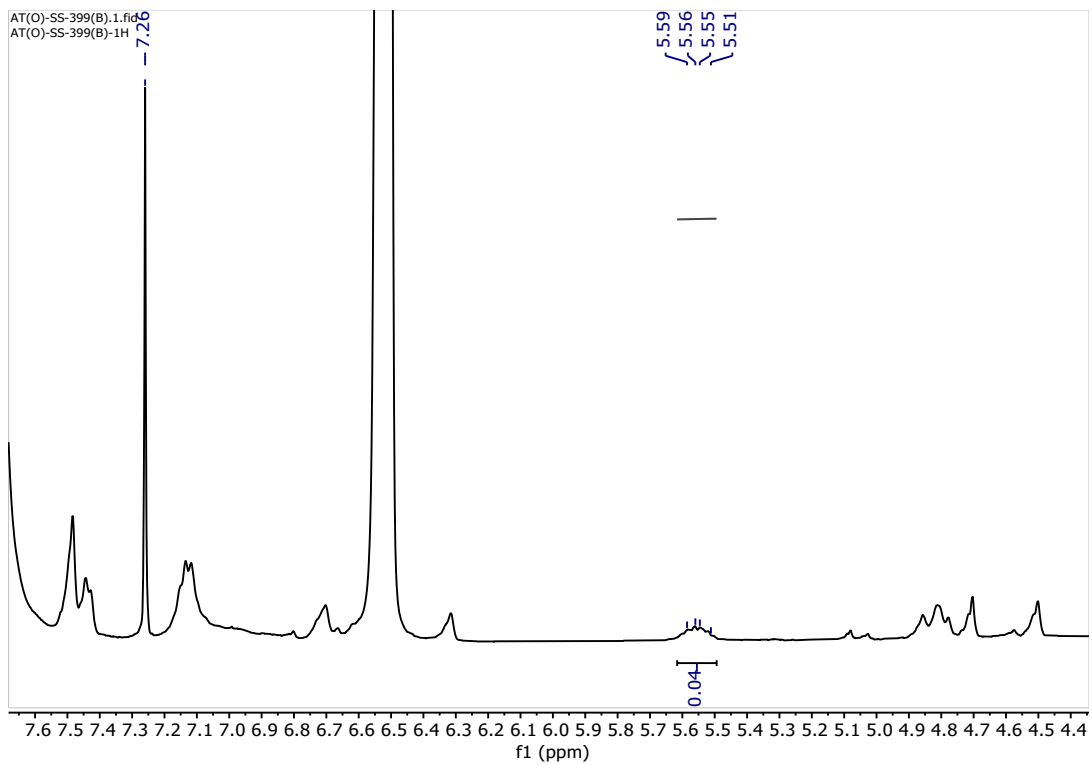

Figure S97. <sup>1</sup>H NMR for Hammett analysis between **2g** and **2a**.

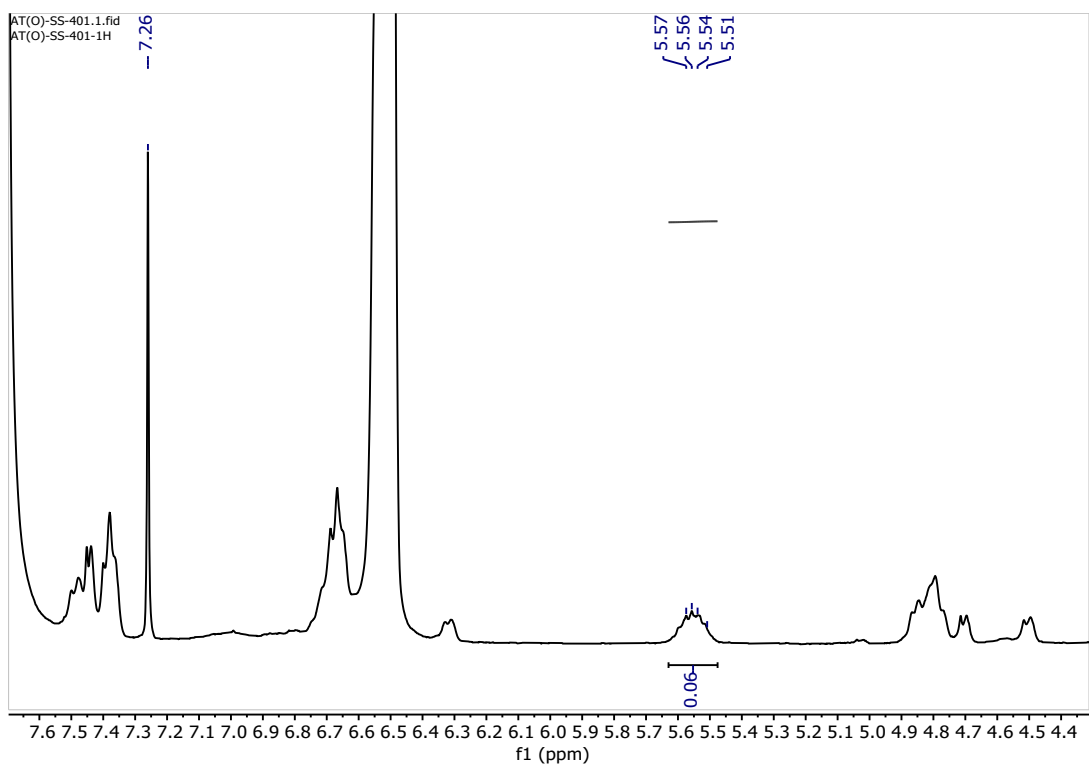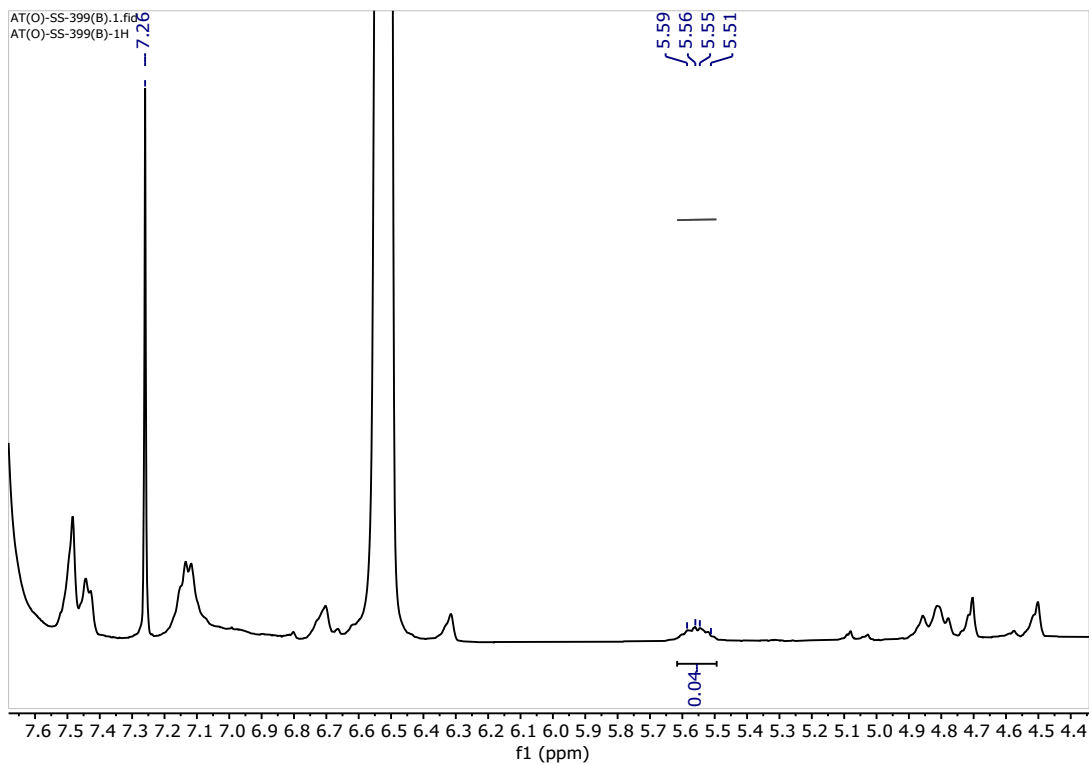

**Figure S98.**  $^1\text{H}$  NMR for Hammett analysis between **2h** and **2a**.

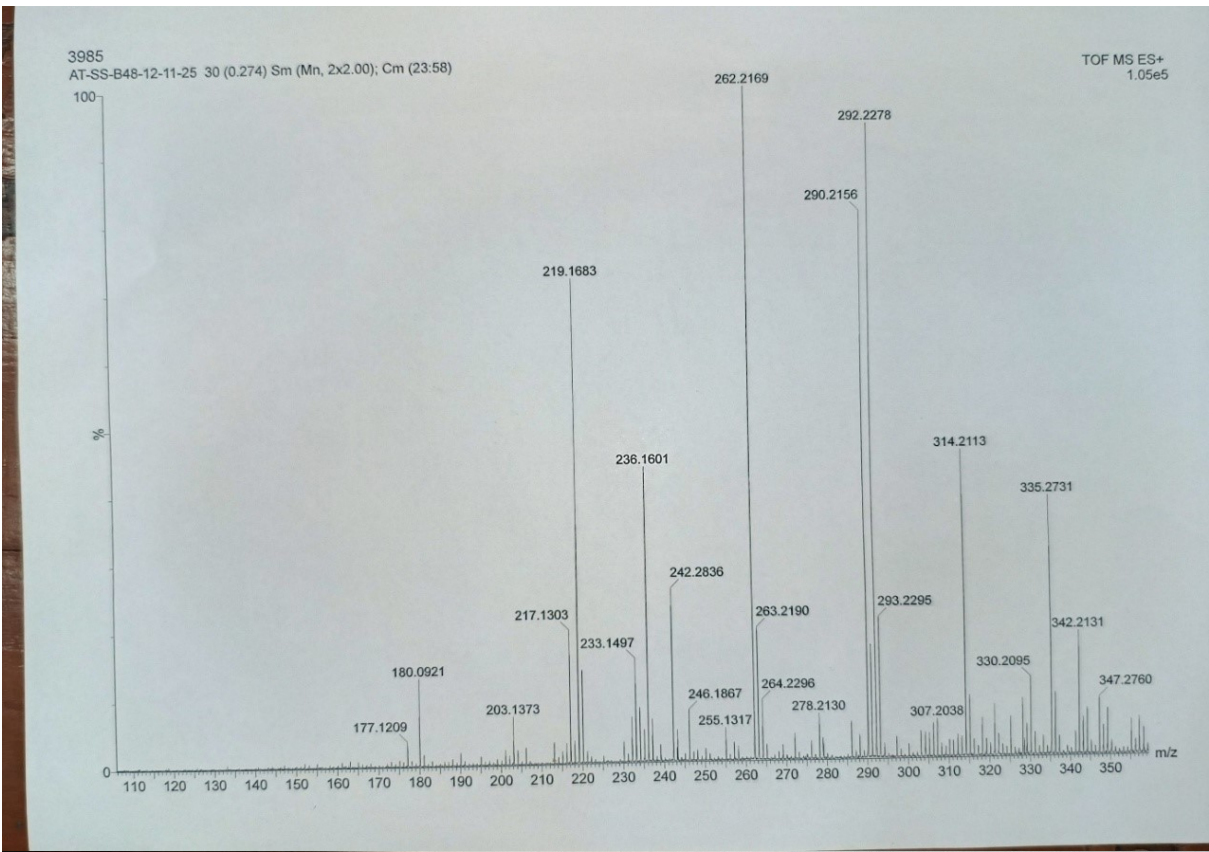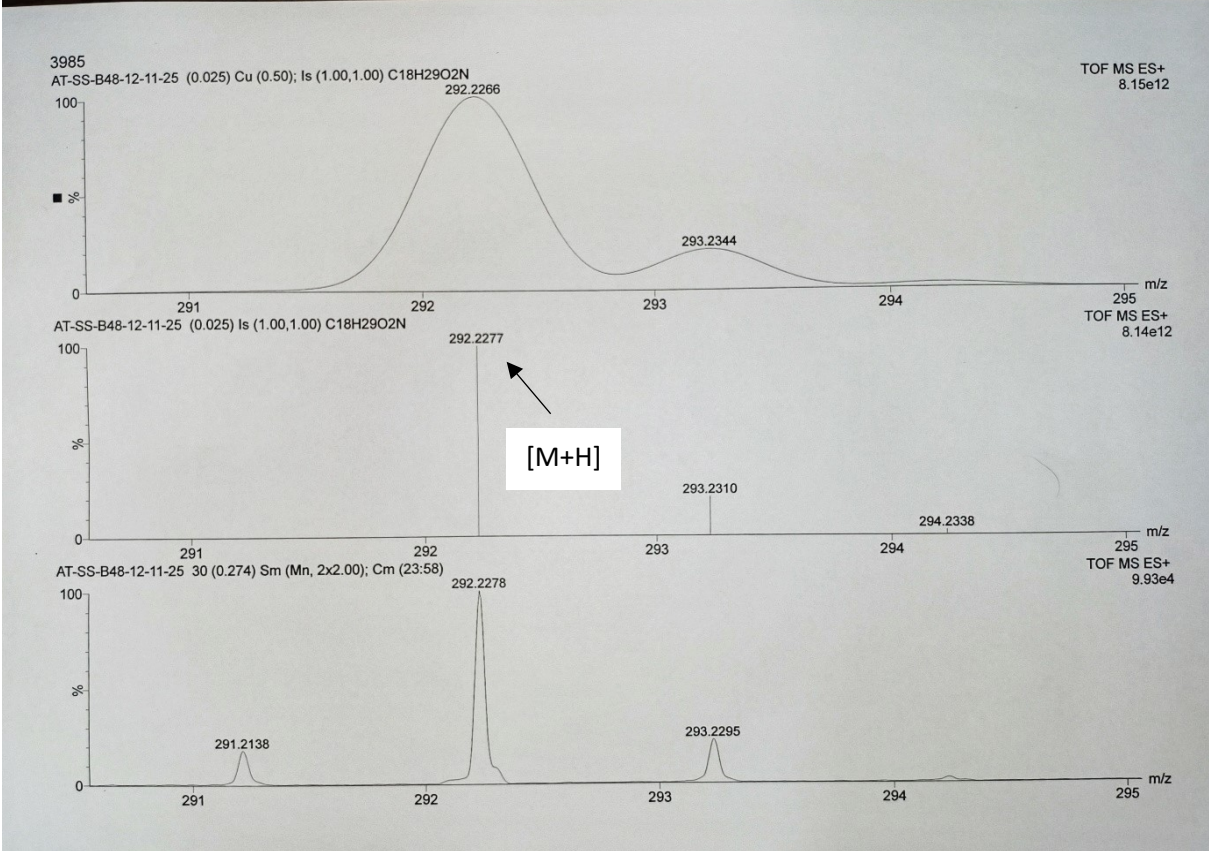

Figure S99. HRMS of BHT radical adduct 3

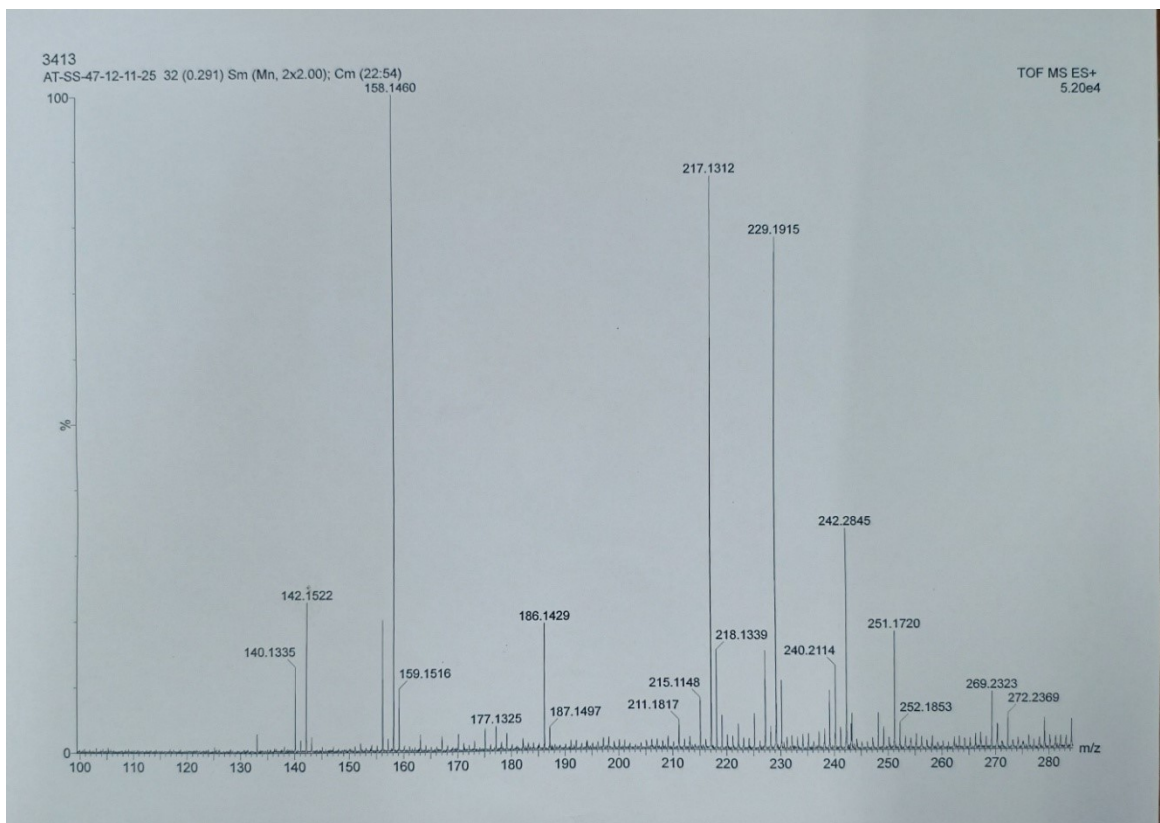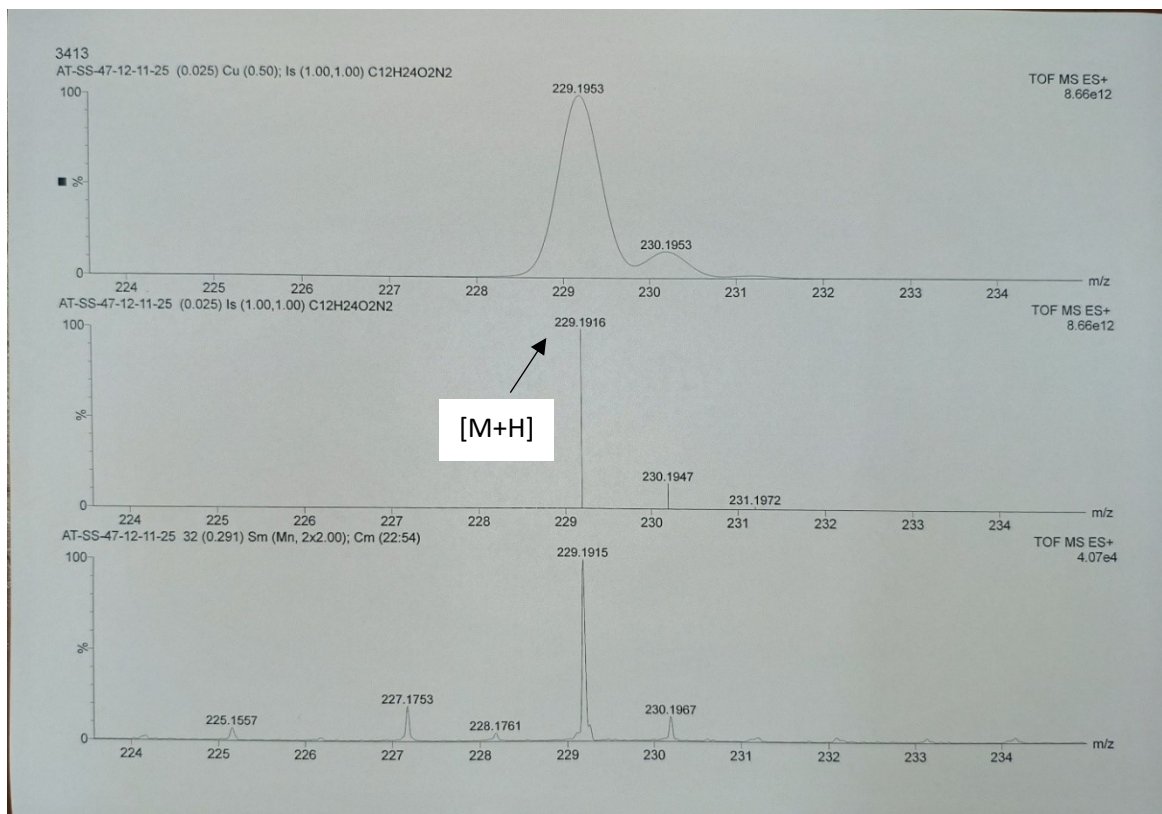

**Figure S100.** HRMS of TEMPO radical adduct 4
